# Supplementary material for: On the Analysis and Assessment of First‐Order Group Contribution Models for the Calculation of Normal Boiling Point and Critical Properties of Pure Compounds
Source: Hindawi journal article supplement (doi:10.1155/2022/5943833), 2022-01-01
Supplement: f1 [file 5943833.f1.docx]

**SUPPORTING INFORMATION**

This file contains tables and figures with different information related to the implementation and analysis of tested group contribution models. The frequency of each functional group in the molecules employed in the correlation stage can be found in an Excel file (Groups_correlation.xlsx), while the interested readers can also find the Excel file (Properties_calculation.xlsx) that can be utilized to calculate *Tb* and critical properties of pure compounds using the best GCMs reported in this paper. These files are available in the next link:

<https://drive.google.com/drive/folders/1fRIMODHy-vZJR0arCpYMUGdFw0SrvF_0?usp=sharing>

**Table S1.** Description of GCMs reported in the literature. Functionalities of these GCMs were used in this study.

| *Model* | *Description* | *Database characteristics* | *Remarks* |
| --- | --- | --- | --- |
| Joback and Reid [11] | First-order GCM for the estimation of and critical properties of pure compounds. | They defined 41 first-order functional groups constituted by oxygen, nitrogen, sulfur and halogen atoms, among others. The experimental database included 438, 409, 392 and 310 compounds for , , and estimation, respectively. | *AARD* = 3.6, 0.8, 5.2 and 2.3% in , , and estimation, respectively. |
| Nannoolal et al. [24] | First and second-order and interaction GCM for the estimation of of pure compounds. | They included 2850 compounds from hydrocarbons, alkanes, alkenes, alkynes, alcohols, aldehydes, ethers, carboxylic acids, phenols, sulfur, nitrogen, ketones, silicon, boron and halogenated compound families, among others, considering 212 groups. | The absolute average deviation values obtained ranged from 0 – 14.93 K for different families of chemicals. |
| where is the number of experimental data, and are experimental and calculated values of tested thermodynamic properties, respectively. | | | |

**Table S2.** Values of the group contributions for the calculation of normal boiling point of pure compounds.

|  |  |  | *Model* | | |
| --- | --- | --- | --- | --- | --- |
| *No.* | *Groups without rings* |  | *MTB1* | *MTB2* | *MTB3* |
| 1 | -CH3 |  | 14.4436 | 40.7058 | -277.6609 |
| 2 | -CH2- |  | 20.0261 | 128.6501 | 137.2887 |
| 3 | >CH- |  | 32.4658 | 207.2991 | 377.1845 |
| 4 | >C< |  | 39.6656 | 243.1028 | 732.5397 |
| 5 | =CH2 |  | 7.4460 | 13.6758 | -358.4738 |
| 6 | =CH- |  | 28.3783 | 143.8602 | 99.5360 |
| 7 | =C< |  | 24.2885 | 165.3749 | 329.2081 |
| 8 | =C= |  | 21.4930 | 119.9238 | 24.1931 |
| 9 | ≡C- |  | 40.0955 | 131.6573 | -4.7535 |
| 10 | ≡CH |  | -11.6195 | 21.5022 | -236.2609 |
|  | *Groups with rings* |  |  |  |  |
| 11 | -CH2- |  | 25.2043 | 105.7079 | -70.1001 |
| 12 | >CH- |  | 24.2379 | 170.3012 | 403.8585 |
| 13 | =CH- |  | 24.8786 | 119.1496 | -18.7521 |
| 14 | >C< |  | 38.9974 | 226.5905 | 688.8267 |
| 15 | =C< |  | 33.0090 | 185.5170 | 527.9949 |
|  | *Groups with oxygen* |  |  |  |  |
| 16 | -OH (alcohol) |  | 98.3339 | 290.1541 | 30.3313 |
| 17 | -OH (phenol) |  | 70.9126 | 232.8900 | -45.9755 |
| 18 | -O- (without rings) |  | 23.6341 | 108.6489 | -27.0910 |
| 19 | -O- (with rings) |  | 8.1156 | 32.1061 | -291.7398 |
| 20 | >C=O (without rings) |  | 70.8677 | 310.1540 | 89.3222 |
| 21 | >C=O (with rings) |  | 90.1529 | 404.8587 | 230.8048 |
| 22 | -CHO (aldehyde) |  | 95.6647 | 307.4823 | -33.9329 |
| 23 | -COOH (acid) |  | 119.3119 | 522.0265 | 94.2966 |
| 24 | -COO- (ester) |  | 77.5798 | 412.5643 | 82.6712 |
| 25 | =O (others) |  | -17.8341 | 0.9036 | -233.9399 |

**Table S2 (continuation).**

|  |  |  | *Model* | | |
| --- | --- | --- | --- | --- | --- |
| *No.* | *Groups with nitrogen* |  | *MTB1* | *MTB2* | *MTB3* |
| 26 | >NH (without rings) |  | 58.8473 | 232.6358 | 173.7571 |
| 27 | >NH (with rings) |  | 55.6408 | 205.0933 | 117.5370 |
| 28 | >N- (without rings) |  | 58.1951 | 256.7064 | 390.2472 |
| 29 | >N- (with rings) |  | 75.0727 | 294.3851 | 410.9504 |
| 30 | -N= (without rings) |  | 81.9084 | 234.4681 | 81.6454 |
| 31 | -N= (with rings) |  | 40.2198 | 129.0833 | -75.3319 |
| 32 | -NH2 (without rings) |  | 57.1883 | 153.5760 | -155.5166 |
| 33 | -NO2 |  | 133.3981 | 479.3125 | -4.2220 |
| 34 | -CN |  | 61.8658 | 216.7609 | -113.7215 |
|  | *Groups with halogen* |  |  |  |  |
| 35 | -F |  | -10.6417 | -47.1905 | -374.8894 |
| 36 | -Cl |  | 24.0844 | 78.7598 | -171.1449 |
| 37 | -Br |  | 36.6514 | 126.4874 | -140.8710 |
| 38 | -I |  | 71.4098 | 229.8802 | -79.2695 |
|  | *Groups with sulfur* |  |  |  |  |
| 39 | -S- (without rings) |  | 73.6157 | 255.3974 | 43.3525 |
| 40 | -S- (with rings) |  | 62.7713 | 181.5095 | -54.1021 |
| 41 | =S< |  | 239.7078 | 729.0393 | 469.3762 |
| 42 | ≥S≤ |  | - | - | - |
| 43 | -SH |  | 68.9183 | 192.8979 | -98.6531 |
|  | *Groups with silicon* |  |  |  |  |
| 44 | >Si< (without rings) |  | 32.0292 | 247.4921 | 284.6389 |
| 45 | >Si< (with rings) |  | 24.0811 | 239.8621 | 462.2867 |
| 46 | >SiH- |  | -8.8911 | 103.1188 | 415.3218 |
| 47 | -SiH3 |  | - | - | - |
|  | *Groups with metals* |  |  |  |  |
| 48 | -Fe- |  | 64.3822 | -204.1827 | -1840.0799 |
| 49 | >Ti< |  | - | - | - |
|  | *Groups with boron* |  |  |  |  |
| 50 | >B- |  | 15.4276 | 157.7583 | 477.7266 |

**Table S3.** Values of the GCM parameters for the calculation of normal boiling point of pure compounds.

| *Model* | *Parameters* | | |
| --- | --- | --- | --- |
| *MTB1* |  | | |
| 212.2391 | | |
| *MTB2* |  |  |  |
| 0.5374 | 0.6489 | 168.5236 |
| *MTB3* |  | | |
| 425.2620 | | |

**Table S4.** Values of the group contributions for the calculation of critical temperature of pure compounds.

|  |  |  | *Model* | | | |
| --- | --- | --- | --- | --- | --- | --- |
| *No.* | *Groups without rings* |  | *MTC1* | *MTC2* | *MTC3* | *MTC4* |
| 1 | -CH3 |  | 0.0053 | 0.0177 | 0.2538 | 0.0167 |
| 2 | -CH2- |  | 0.0115 | 0.0094 | 0.0702 | 0.0042 |
| 3 | >CH- |  | 0.0192 | 0.0046 | -0.0190 | -0.0056 |
| 4 | >C< |  | 0.0231 | -0.0052 | -0.3299 | -0.0181 |
| 5 | =CH2 |  | -0.0032 | 0.0110 | 0.2569 | 0.0125 |
| 6 | =CH- |  | 0.0136 | 0.0120 | 0.1437 | 0.0062 |
| 7 | =C< |  | 0.0155 | 0.0010 | -0.0189 | -0.0089 |
| 8 | =C= |  | -0.0144 | -0.0131 | 0.2354 | -0.0149 |
| 9 | ≡C- |  | -0.0057 | -0.0053 | 0.2111 | -0.0111 |
| 10 | ≡CH |  | -0.0039 | 0.0099 | 0.2322 | 0.0152 |
|  | *Groups with rings* |  |  |  |  |  |
| 11 | -CH2- |  | 0.0031 | 0.0074 | 0.2120 | 0.0015 |
| 12 | >CH- |  | 0.0169 | 0.0067 | 0.0366 | -0.0041 |
| 13 | =CH- |  | 0.0037 | 0.0079 | 0.2098 | 0.0022 |
| 14 | >C< |  | 0.0145 | -0.0076 | -0.2441 | -0.0197 |
| 15 | =C< |  | 0.0108 | 0.0018 | 0.0054 | -0.0079 |
|  | *Groups with oxygen* |  |  |  |  |  |
| 16 | -OH (alcohol) |  | 0.0144 | 0.0262 | 0.2293 | 0.0234 |
| 17 | -OH (phenol) |  | 0.0052 | 0.0150 | 0.2722 | 0.0124 |
| 18 | -O- (without rings) |  | 0.0097 | 0.0087 | 0.1806 | 0.0026 |
| 19 | -O- (with rings) |  | -0.0006 | 0.0081 | 0.2660 | 0.0006 |
| 20 | >C=O (without rings) |  | 0.0213 | 0.0190 | 0.1520 | 0.0079 |
| 21 | >C=O (with rings) |  | 0.0148 | 0.0184 | 0.1728 | 0.0065 |
| 22 | -CHO (aldehyde) |  | 0.0043 | 0.0165 | 0.2109 | 0.0126 |
| 23 | -COOH (acid) |  | 0.0372 | 0.0431 | 0.1415 | 0.0287 |
| 24 | -COO- (ester) |  | 0.0320 | 0.0262 | 0.1196 | 0.0104 |
| 25 | =O (others) |  | -0.0145 | 0.0004 | 0.2661 | 0.0045 |

**Table S4 (continuation).**

|  |  |  | *Model* | | | |
| --- | --- | --- | --- | --- | --- | --- |
| *No.* | *Groups with nitrogen* |  | *MTC1* | *MTC2* | *MTC3* | *MTC4* |
| 26 | >NH (without rings) |  | 0.0169 | 0.0152 | 0.1008 | 0.0111 |
| 27 | >NH (with rings) |  | 0.0023 | 0.0074 | 0.2050 | 0.0017 |
| 28 | >N- (without rings) |  | 0.0099 | -0.0053 | 0.0881 | -0.0158 |
| 29 | >N- (with rings) |  | 0.0238 | 0.0120 | -0.0027 | -0.0014 |
| 30 | -N= (without rings) |  | 0.0389 | 0.0348 | 0.0822 | 0.0246 |
| 31 | -N= (with rings) |  | -0.0083 | -0.0030 | 0.2659 | -0.0078 |
| 32 | -NH2 (without rings) |  | -0.0028 | 0.0111 | 0.3005 | 0.0106 |
| 33 | -NO2 |  | 0.0086 | 0.0210 | 0.2153 | 0.0114 |
| 34 | -CN |  | 0.0165 | 0.0273 | 0.2050 | 0.0208 |
|  | *Groups with halogen* |  |  |  |  |  |
| 35 | -F |  | 0.0003 | 0.0126 | 0.2614 | 0.0124 |
| 36 | -Cl |  | -0.0045 | 0.0090 | 0.2627 | 0.0088 |
| 37 | -Br |  | -0.0082 | 0.0062 | 0.2431 | 0.0062 |
| 38 | -I |  | -0.0110 | 0.0036 | 0.2303 | 0.0036 |
|  | *Groups with sulfur* |  |  |  |  |  |
| 39 | -S- (without rings) |  | 0.0001 | 0.0006 | 0.2093 | -0.0033 |
| 40 | -S- (with rings) |  | -0.0152 | -0.0019 | 0.2637 | -0.0072 |
| 41 | =S< |  | - | - | - | - |
| 42 | ≥S≤ |  | 0.9774 | -0.0713 | 0.2759 | -0.0862 |
| 43 | -SH |  | -0.0171 | -0.0008 | 0.2649 | 0.0037 |
|  | *Groups with silicon* |  |  |  |  |  |
| 44 | >Si< (without rings) |  | 0.0333 | 0.0019 | -0.0531 | -0.0136 |
| 45 | >Si< (with rings) |  | 0.0327 | -0.0005 | -0.1693 | -0.0143 |
| 46 | >SiH- |  | 0.7226 | 0.0093 | -0.3095 | -0.0018 |
| 47 | -SiH3 |  | 0.9783 | 0.0194 | 0.1894 | 0.0239 |
|  | *Groups with metals* |  |  |  |  |  |
| 48 | -Fe- |  | -0.0631 | 0.0465 | -3.0707 | 0.0776 |
| 49 | >Ti< |  | 0.2688 | 0.2039 | -3.8570 | 0.1155 |
|  | *Groups with boron* |  |  |  |  |  |
| 50 | >B- |  | 0.0194 | 0.0024 | -0.2397 | -0.0067 |

**Table S5.** Values of the GCMs parameters for the calculation of critical temperature of pure compounds.

| *Model* | *Parameters* | | | | |
| --- | --- | --- | --- | --- | --- |
| *MTC1* |  | | | | |
| 0.6208 | | | | |
| *MTC2* |  | |  | | |
| 0.5897 | | 1.1994 | | |
| *MTC3* |  | |  | | |
| 0.8209 | | -0.6633 | | |
| *MTC4* |  |  | |  |  |
| 0.0210 | 0.5502 | | 0.0554 | 1.3836 |

**Table S6.** Values of the group contributions for the calculation of critical pressure of pure compounds.

|  |  |  | *Models* | | | |
| --- | --- | --- | --- | --- | --- | --- |
| *No.* | *Groups without rings* |  | *MPC1* | *MPC2* | *MPC3* | *MPC4* |
| 1 | -CH3 |  | 0.2788 | 0.0087 | 0.2784 | 0.3038 |
| 2 | -CH2- |  | 0.2314 | 0.0036 | 0.2312 | 0.2315 |
| 3 | >CH- |  | 0.1556 | -0.0027 | 0.1556 | 0.1306 |
| 4 | >C< |  | 0.1023 | -0.0047 | 0.1024 | 0.0520 |
| 5 | =CH2 |  | 0.2568 | 0.0082 | 0.2564 | 0.2821 |
| 6 | =CH- |  | 0.1879 | 0.0011 | 0.1877 | 0.1878 |
| 7 | =C< |  | 0.1260 | -0.0032 | 0.1259 | 0.1014 |
| 8 | =C= |  | 0.0895 | -0.0096 | 0.0893 | 0.0896 |
| 9 | ≡C- |  | 0.1229 | -0.0035 | 0.1227 | 0.1231 |
| 10 | ≡CH |  | 0.2039 | 0.0015 | 0.2035 | 0.2290 |
|  | *Groups with rings* |  |  |  |  |  |
| 11 | -CH2- |  | 0.2014 | 0.0020 | 0.2012 | 0.2023 |
| 12 | >CH- |  | 0.1477 | -0.0016 | 0.1475 | 0.1149 |
| 13 | =CH- |  | 0.1734 | 0.0003 | 0.1732 | 0.1739 |
| 14 | >C< |  | 0.0660 | -0.0067 | 0.0660 | 0.0159 |
| 15 | =C< |  | 0.0930 | -0.0041 | 0.0929 | 0.0683 |
|  | *Groups with oxygen* |  |  |  |  |  |
| 16 | -OH (alcohol) |  | 0.0922 | -0.0078 | 0.0919 | 0.1174 |
| 17 | -OH (phenol) |  | 0.1057 | -0.0118 | 0.1053 | 0.1307 |
| 18 | -O- (without rings) |  | 0.1484 | -0.0036 | 0.1482 | 0.1484 |
| 19 | -O- (with rings) |  | 0.1544 | -0.0066 | 0.1541 | 0.1550 |
| 20 | >C=O (without rings) |  | 0.2838 | -0.0046 | 0.2834 | 0.2839 |
| 21 | >C=O (with rings) |  | 0.2837 | -0.0051 | 0.2832 | 0.2845 |
| 22 | -CHO (aldehyde) |  | 0.2213 | -0.0114 | 0.2208 | 0.2457 |
| 23 | -COOH (acid) |  | 0.4097 | -0.0099 | 0.4090 | 0.4349 |
| 24 | -COO- (ester) |  | 0.4780 | -0.0059 | 0.4774 | 0.4781 |
| 25 | =O (others) |  | 0.2143 | -0.0045 | 0.2140 | 0.2393 |
|  | *Groups with nitrogen* |  |  |  |  |  |
| 26 | >NH (without rings) |  | 0.1434 | -0.0044 | 0.1432 | 0.1436 |
| 27 | >NH (with rings) |  | 0.0969 | -0.0109 | 0.0966 | 0.0964 |

**Table S6 (continuation).**

|  |  |  | *Models* | | | |
| --- | --- | --- | --- | --- | --- | --- |
| *No.* | *Groups with nitrogen* |  | *MPC1* | *MPC2* | *MPC3* | *MPC4* |
| 28 | >N- (without rings) |  | 0.1671 | 0.0032 | 0.1670 | 0.1419 |
| 29 | >N- (with rings) |  | 0.1318 | -0.0006 | 0.1317 | 0.1077 |
| 30 | -N= (without rings) |  | 0.1859 | 0.0041 | 0.1857 | 0.1862 |
| 31 | -N= (with rings) |  | 0.0878 | -0.0111 | 0.0875 | 0.0881 |
| 32 | -NH2 (without rings) |  | 0.1122 | -0.0074 | 0.1119 | 0.1375 |
| 33 | -NO2 |  | 0.4816 | -0.0098 | 0.4808 | 0.5069 |
| 34 | -CN |  | 0.3706 | 0.0030 | 0.3700 | 0.3958 |
|  | *Groups with halogen* |  |  |  |  |  |
| 35 | -F |  | 0.2639 | 0.0041 | 0.2636 | 0.2891 |
| 36 | -Cl |  | 0.3694 | 0.0029 | 0.3691 | 0.3946 |
| 37 | -Br |  | 0.6593 | 0.0019 | 0.6589 | 0.6844 |
| 38 | -I |  | 0.9175 | 0.0011 | 0.9172 | 0.9427 |
|  | *Groups with sulfur* |  |  |  |  |  |
| 39 | -S- (without rings) |  | 0.2627 | -0.0063 | 0.2625 | 0.2630 |
| 40 | -S- (with rings) |  | 0.2465 | -0.0094 | 0.2461 | 0.2474 |
| 41 | =S< |  | - | - | - | - |
| 42 | ≥S≤ |  | -0.0453 | -0.0226 | -0.0449 | -0.1457 |
| 43 | -SH |  | 0.2950 | -0.0075 | 0.2946 | 0.3203 |
|  | *Groups with silicon* |  |  |  |  |  |
| 44 | >Si< (without rings) |  | 0.4136 | 0.0000 | 0.4137 | 0.3636 |
| 45 | >Si< (with rings) |  | 0.3983 | 0.0066 | 0.3984 | 0.3482 |
| 46 | >SiH- |  | 0.5586 | 0.0286 | 0.5586 | 0.5340 |
| 47 | -SiH3 |  | 0.6037 | 0.0239 | 0.6034 | 0.6289 |
|  | *Groups with metals* |  |  |  |  |  |
| 48 | -Fe- |  | 0.7919 | 0.0301 | 0.7909 | 1.0680 |
| 49 | >Ti< |  | 1.1475 | 0.0380 | 1.1476 | 1.0975 |
|  | *Groups with boron* |  |  |  |  |  |
| 50 | >B- |  | 0.1981 | 0.0025 | 0.1981 | 0.1732 |

**Table S7.** Values of the GCMs parameters for the calculation of critical pressure of pure compounds.

| *Model* | *Parameters* | | | |
| --- | --- | --- | --- | --- |
| *MPC1* |  | | | |
| 0.2436 | | | |
| *MPC2* |  | |  | |
| -0.1142 | | 0.0053 | |
| *MPC3* |  | |  | |
| -0.2439 | | 0.0002 | |
| *MPC4* |  |  | |  |
| -0.1932 | 1.00E-14 | | -0.0477 |

**Table S8.** Values of the group contributions for the calculation of critical volume of pure compounds.

|  |  |  | *Model* | | | |
| --- | --- | --- | --- | --- | --- | --- |
| *No.* | *Groups without rings* |  | *MVC1* | *MVC2* | *MVC3* | *MVC4* |
| 1 | -CH3 |  | 74.8364 | 1078.5076 | 69.0403 | 44.1707 |
| 2 | -CH2- |  | 57.8768 | 1593.9905 | 52.0903 | 29.0128 |
| 3 | >CH- |  | 33.3186 | 1830.3802 | 27.5409 | 6.2646 |
| 4 | >C< |  | 19.0264 | 2754.6035 | 13.2566 | -6.2155 |
| 5 | =CH2 |  | 67.0567 | 1076.3560 | 61.2621 | 38.2139 |
| 6 | =CH- |  | 42.4982 | 1337.9083 | 36.7020 | 15.4499 |
| 7 | =C< |  | 25.4439 | 1794.5220 | 19.6661 | 0.2187 |
| 8 | =C= |  | 35.2514 | 1212.9854 | 29.4956 | 10.0544 |
| 9 | ≡C- |  | 34.0372 | 1206.2726 | 28.2409 | 8.8094 |
| 10 | ≡CH |  | 56.6224 | 1063.8342 | 50.8285 | 29.5982 |
|  | *Groups with rings* |  |  |  |  |  |
| 11 | -CH2- |  | 53.3682 | 1177.0709 | 47.5772 | 24.6463 |
| 12 | >CH- |  | 26.9200 | 2269.2859 | 21.1365 | -0.5126 |
| 13 | =CH- |  | 43.5446 | 1244.7527 | 37.7537 | 16.5107 |
| 14 | >C< |  | 18.6156 | 2619.8689 | 12.8419 | -6.6096 |
| 15 | =C< |  | 26.5136 | 1969.3339 | 20.7321 | 1.2873 |
|  | *Groups with oxygen* |  |  |  |  |  |
| 16 | -OH (alcohol) |  | 35.2949 | 935.6671 | 29.4993 | 1.0657 |
| 17 | -OH (phenol) |  | 3.0992 | 428.1683 | -2.6997 | -31.1586 |
| 18 | -O- (without rings) |  | 17.1248 | 1183.0799 | 11.3352 | -15.3040 |
| 19 | -O- (with rings) |  | 33.3868 | 926.7238 | 27.5947 | 0.8615 |
| 20 | >C=O (without rings) |  | 46.3033 | 1285.8812 | 34.7284 | -11.3481 |
| 21 | >C=O (with rings) |  | 59.2072 | 1379.5815 | 47.6420 | 1.3343 |
| 22 | -CHO (aldehyde) |  | 83.6522 | 1191.2542 | 71.9850 | 24.1461 |
| 23 | -COOH (acid) |  | 90.6442 | 1160.3178 | 73.2867 | -1.2283 |
| 24 | -COO- (ester) |  | 84.5795 | 1311.9515 | 67.2203 | -5.5031 |
| 25 | =O (others) |  | 43.7313 | 1027.1014 | 37.8957 | 11.3060 |

**Table S8 (continuation).**

|  |  |  | *Model* | | | |
| --- | --- | --- | --- | --- | --- | --- |
| *No.* | *Groups with nitrogen* |  | *MVC1* | *MVC2* | *MVC3* | *MVC4* |
| 26 | >NH (without rings) |  | 65.2151 | 1382.6249 | 59.4268 | 34.5656 |
| 27 | >NH (with rings) |  | 29.5898 | 1378.4334 | 23.8064 | -1.4232 |
| 28 | >N- (without rings) |  | 20.5492 | 1584.3711 | 14.8609 | -8.2530 |
| 29 | >N- (with rings) |  | 22.1798 | 1369.2438 | 16.3652 | -6.7498 |
| 30 | -N= (without rings) |  | 33.0066 | 1281.2095 | 27.2296 | 4.1560 |
| 31 | -N= (with rings) |  | 27.6720 | 1028.6534 | 21.8876 | -1.1562 |
| 32 | -NH2 (without rings) |  | 57.7618 | 953.0803 | 51.9672 | 25.3077 |
| 33 | -NO2 |  | 106.1293 | 1132.2018 | 88.7529 | 12.4644 |
| 34 | -CN |  | 96.1058 | 1112.9532 | 84.5297 | 42.0839 |
|  | *Groups with halogen* |  |  |  |  |  |
| 35 | -F |  | 31.3571 | 907.9716 | 25.5616 | -6.4776 |
| 36 | -Cl |  | 65.6818 | 1074.8852 | 59.8858 | -1.8816 |
| 37 | -Br |  | 86.8871 | 1137.3729 | 81.1000 | -60.9939 |
| 38 | -I |  | 107.0674 | 1207.7480 | 101.2677 | -125.7370 |
|  | *Groups with sulfur* |  |  |  |  |  |
| 39 | -S- (without rings) |  | 57.1483 | 1225.6326 | 51.3580 | -4.3124 |
| 40 | -S- (with rings) |  | 51.7671 | 1063.5694 | 46.0038 | -9.6602 |
| 41 | =S< |  | 20.6409 | 1314.0361 | 14.9220 | -40.8216 |
| 42 | ≥S≤ |  | 15.1640 | 2219.8686 | 9.4137 | -46.3186 |
| 43 | -SH |  | 80.9718 | 1103.7048 | 75.1703 | 17.6752 |
|  | *Groups with silicon* |  |  |  |  |  |
| 44 | >Si< (without rings) |  | 88.7961 | 2456.9867 | 83.0329 | 34.4921 |
| 45 | >Si< (with rings) |  | 62.3766 | 3664.7756 | 56.5970 | 8.1898 |
| 46 | >SiH- |  | - | - | - | - |
| 47 | -SiH3 |  | 128.9638 | 1487.1545 | 123.1879 | 69.2669 |

**Table S9.** Values of the GCMs parameters for the calculation of critical volume of pure compounds.

| *Model* | *Parameters* | | | |
| --- | --- | --- | --- | --- |
| *MVC1* |  | | | |
| -1.0442 | | | |
| *MVC2* |  | | | |
| -951.6481 | | | |
| *MVC3* |  | |  | |
| -1.0275 | | 5.7870 | |
| *MVC4* |  |  | |  |
| -1.0824 | 3.5189 | | 1.8069 |

**Figure S1.** General sketch of the problem under study. a) Flowchart of the steps of this study. b) Flowchart of the procedure to estimate the thermodynamic properties using GCMs and ANN and their evaluation.

| a) | b) |
| --- | --- |
|  |  |

**Figure S2.** Illustration of the approach used to correct the calculations of first-order GCMs with ANN.


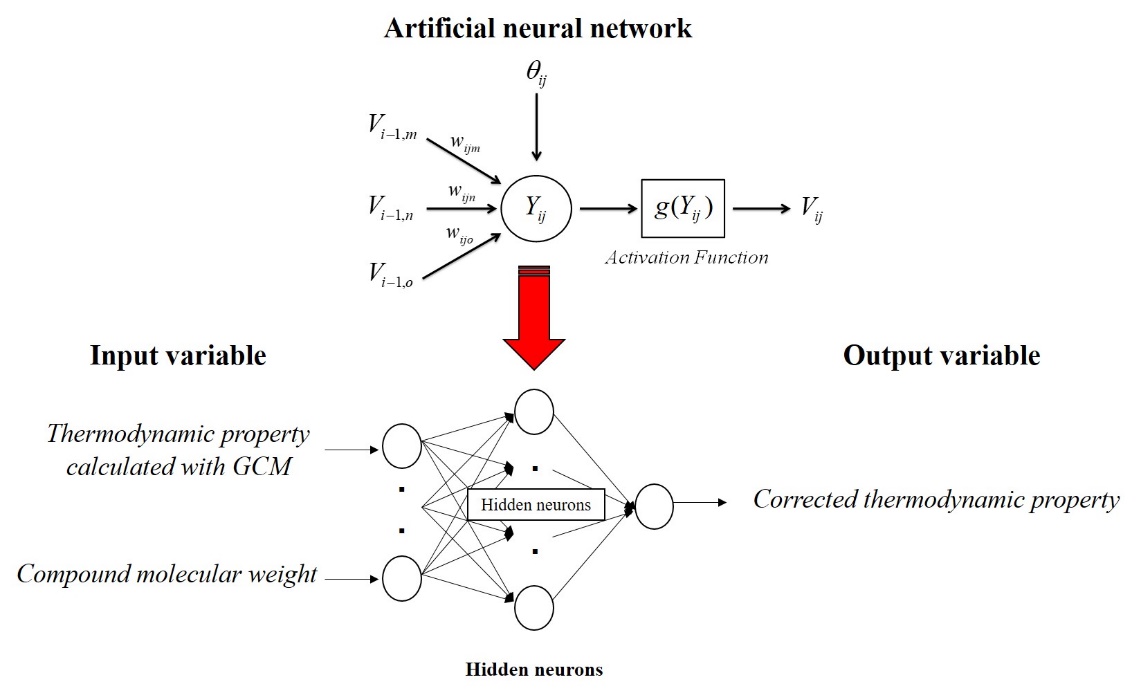


**Figure S3.** *ARD* for the calculation of normal boiling point with *MTB2* model. The diameter of symbol “O” is directly associated with *ARD* magnitude.

| *Experimental normal boiling point Tb, K* | *a) Alkane* | *b) Alkene* | *c) Alkyne* |
| --- | --- | --- | --- |
| *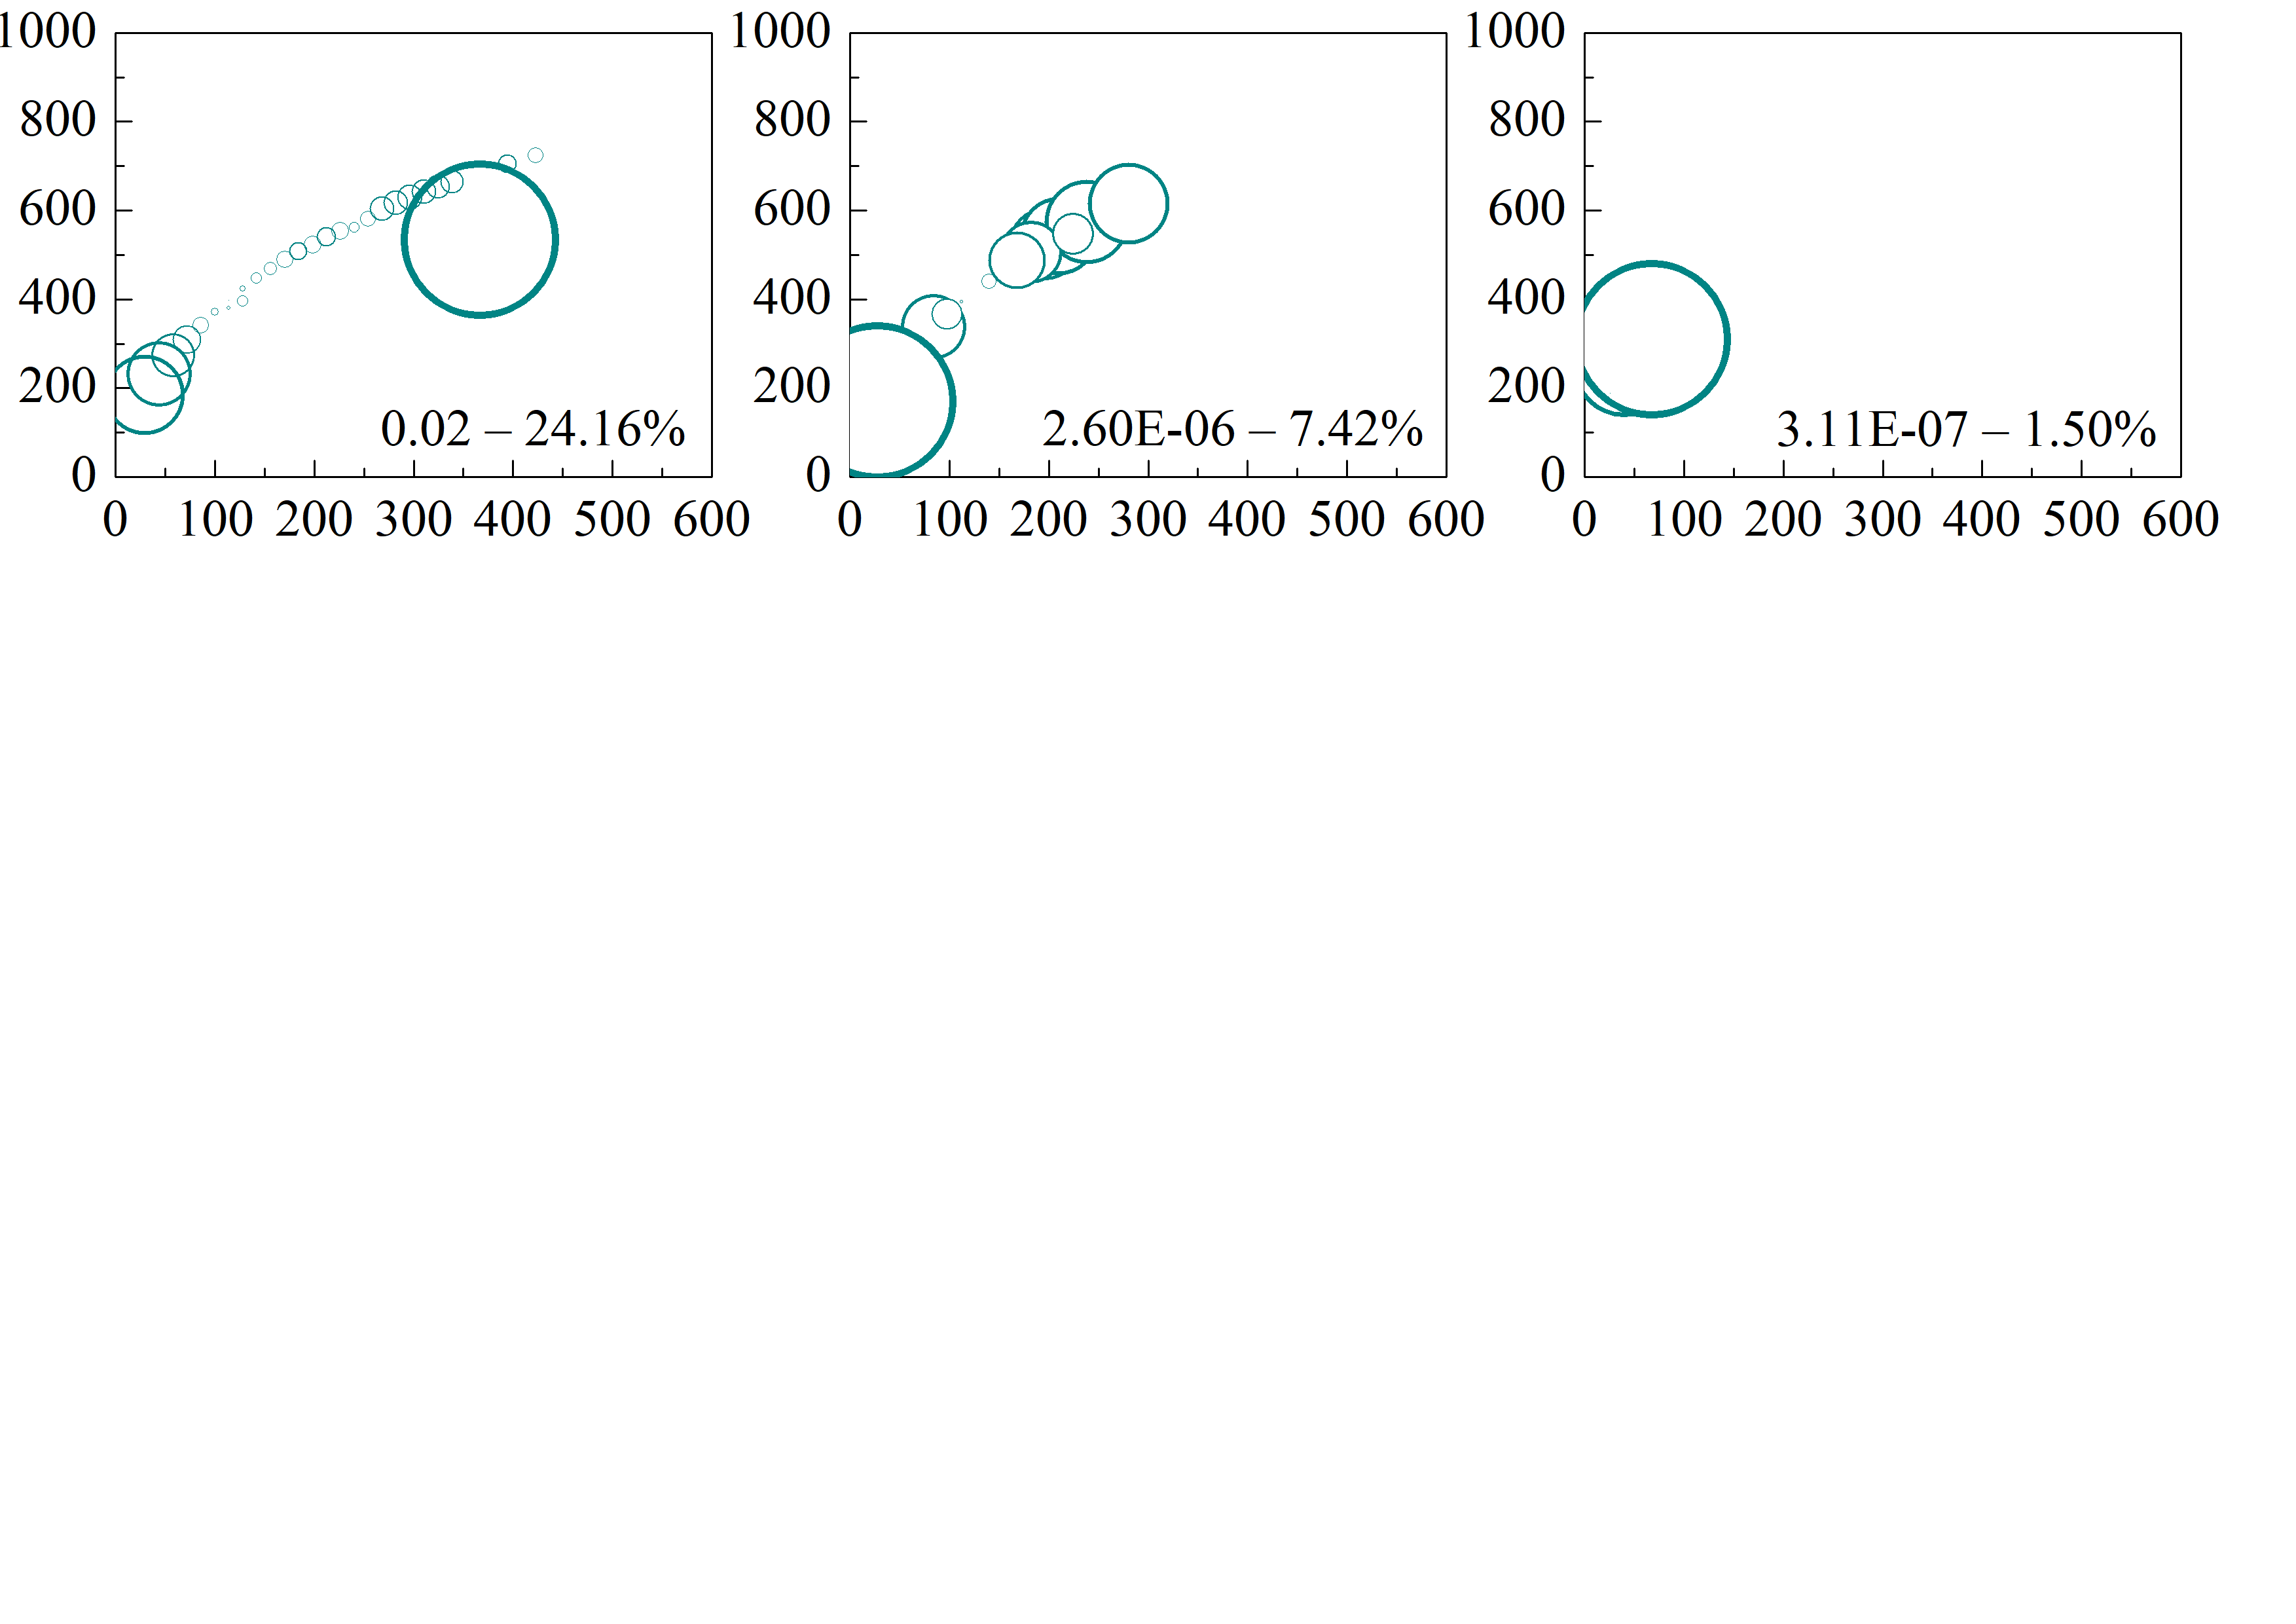* | | | |
| *d) Cyclic hydrocarbon* | *e) Aromatic hydrocarbon* | *f) Alcohol* |
| *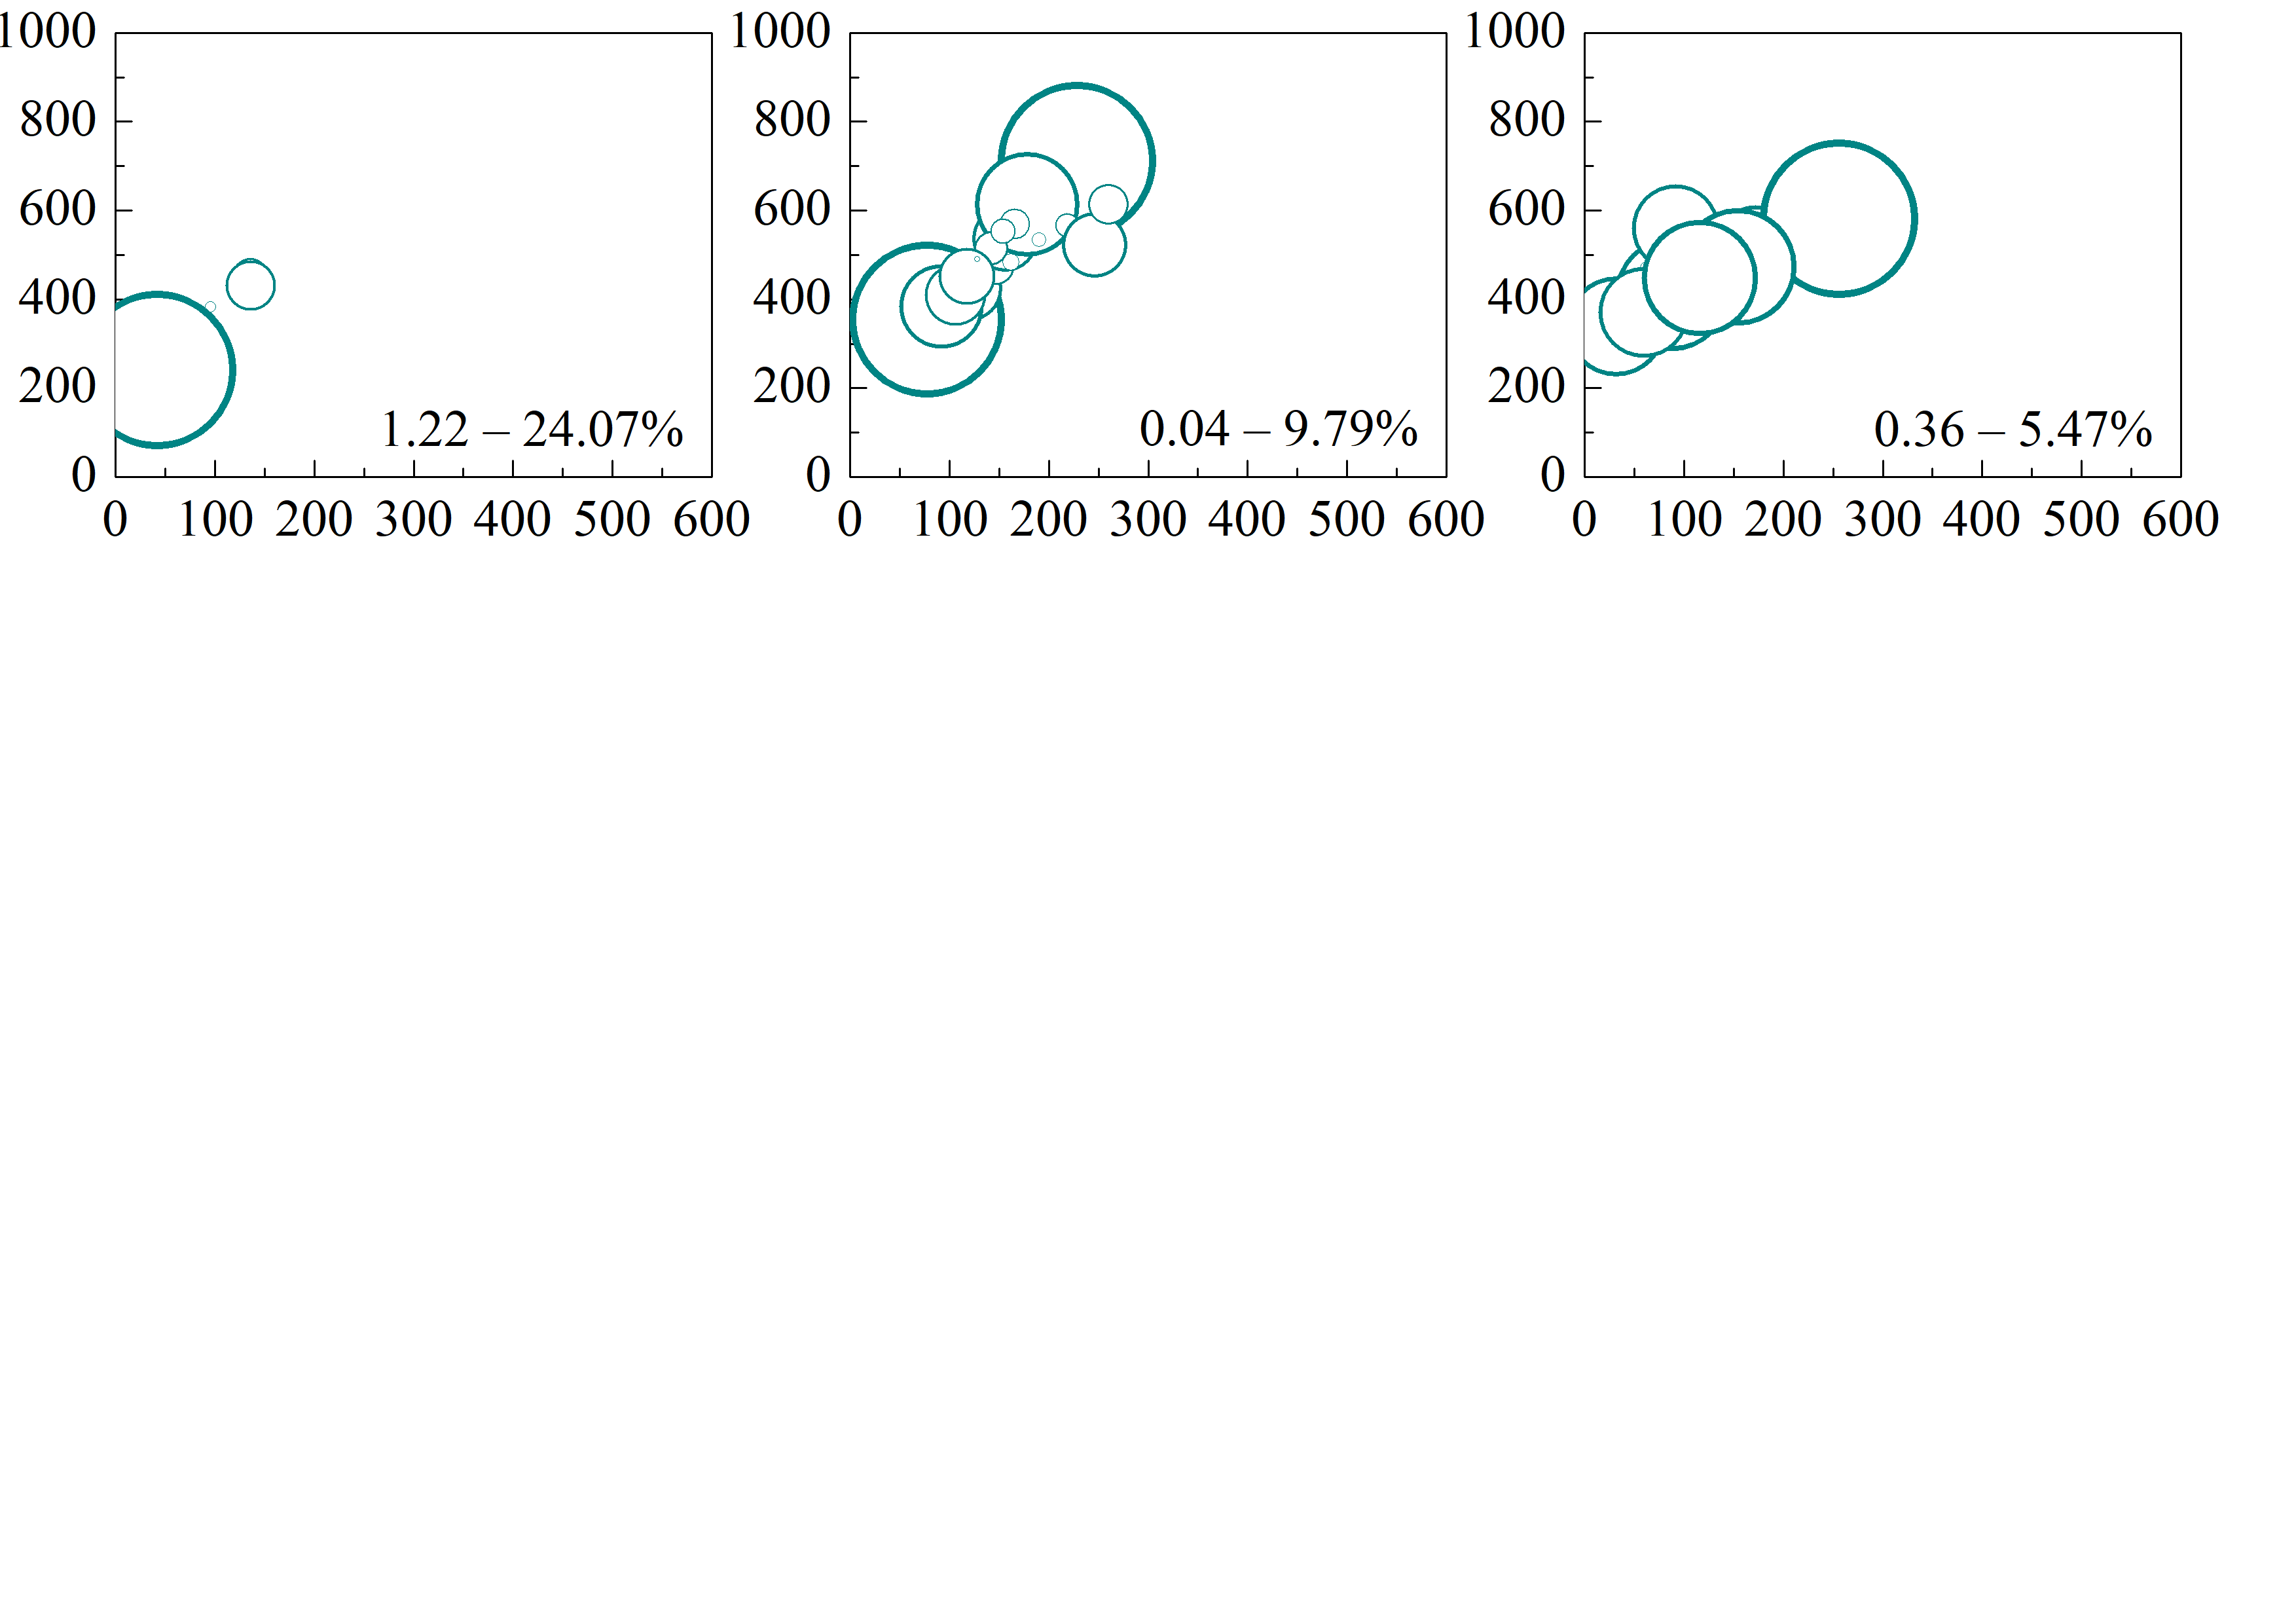* | | | | |
| *g) Phenol* | *h) Carboxylic acid* | *i) Aldehyde* |
| *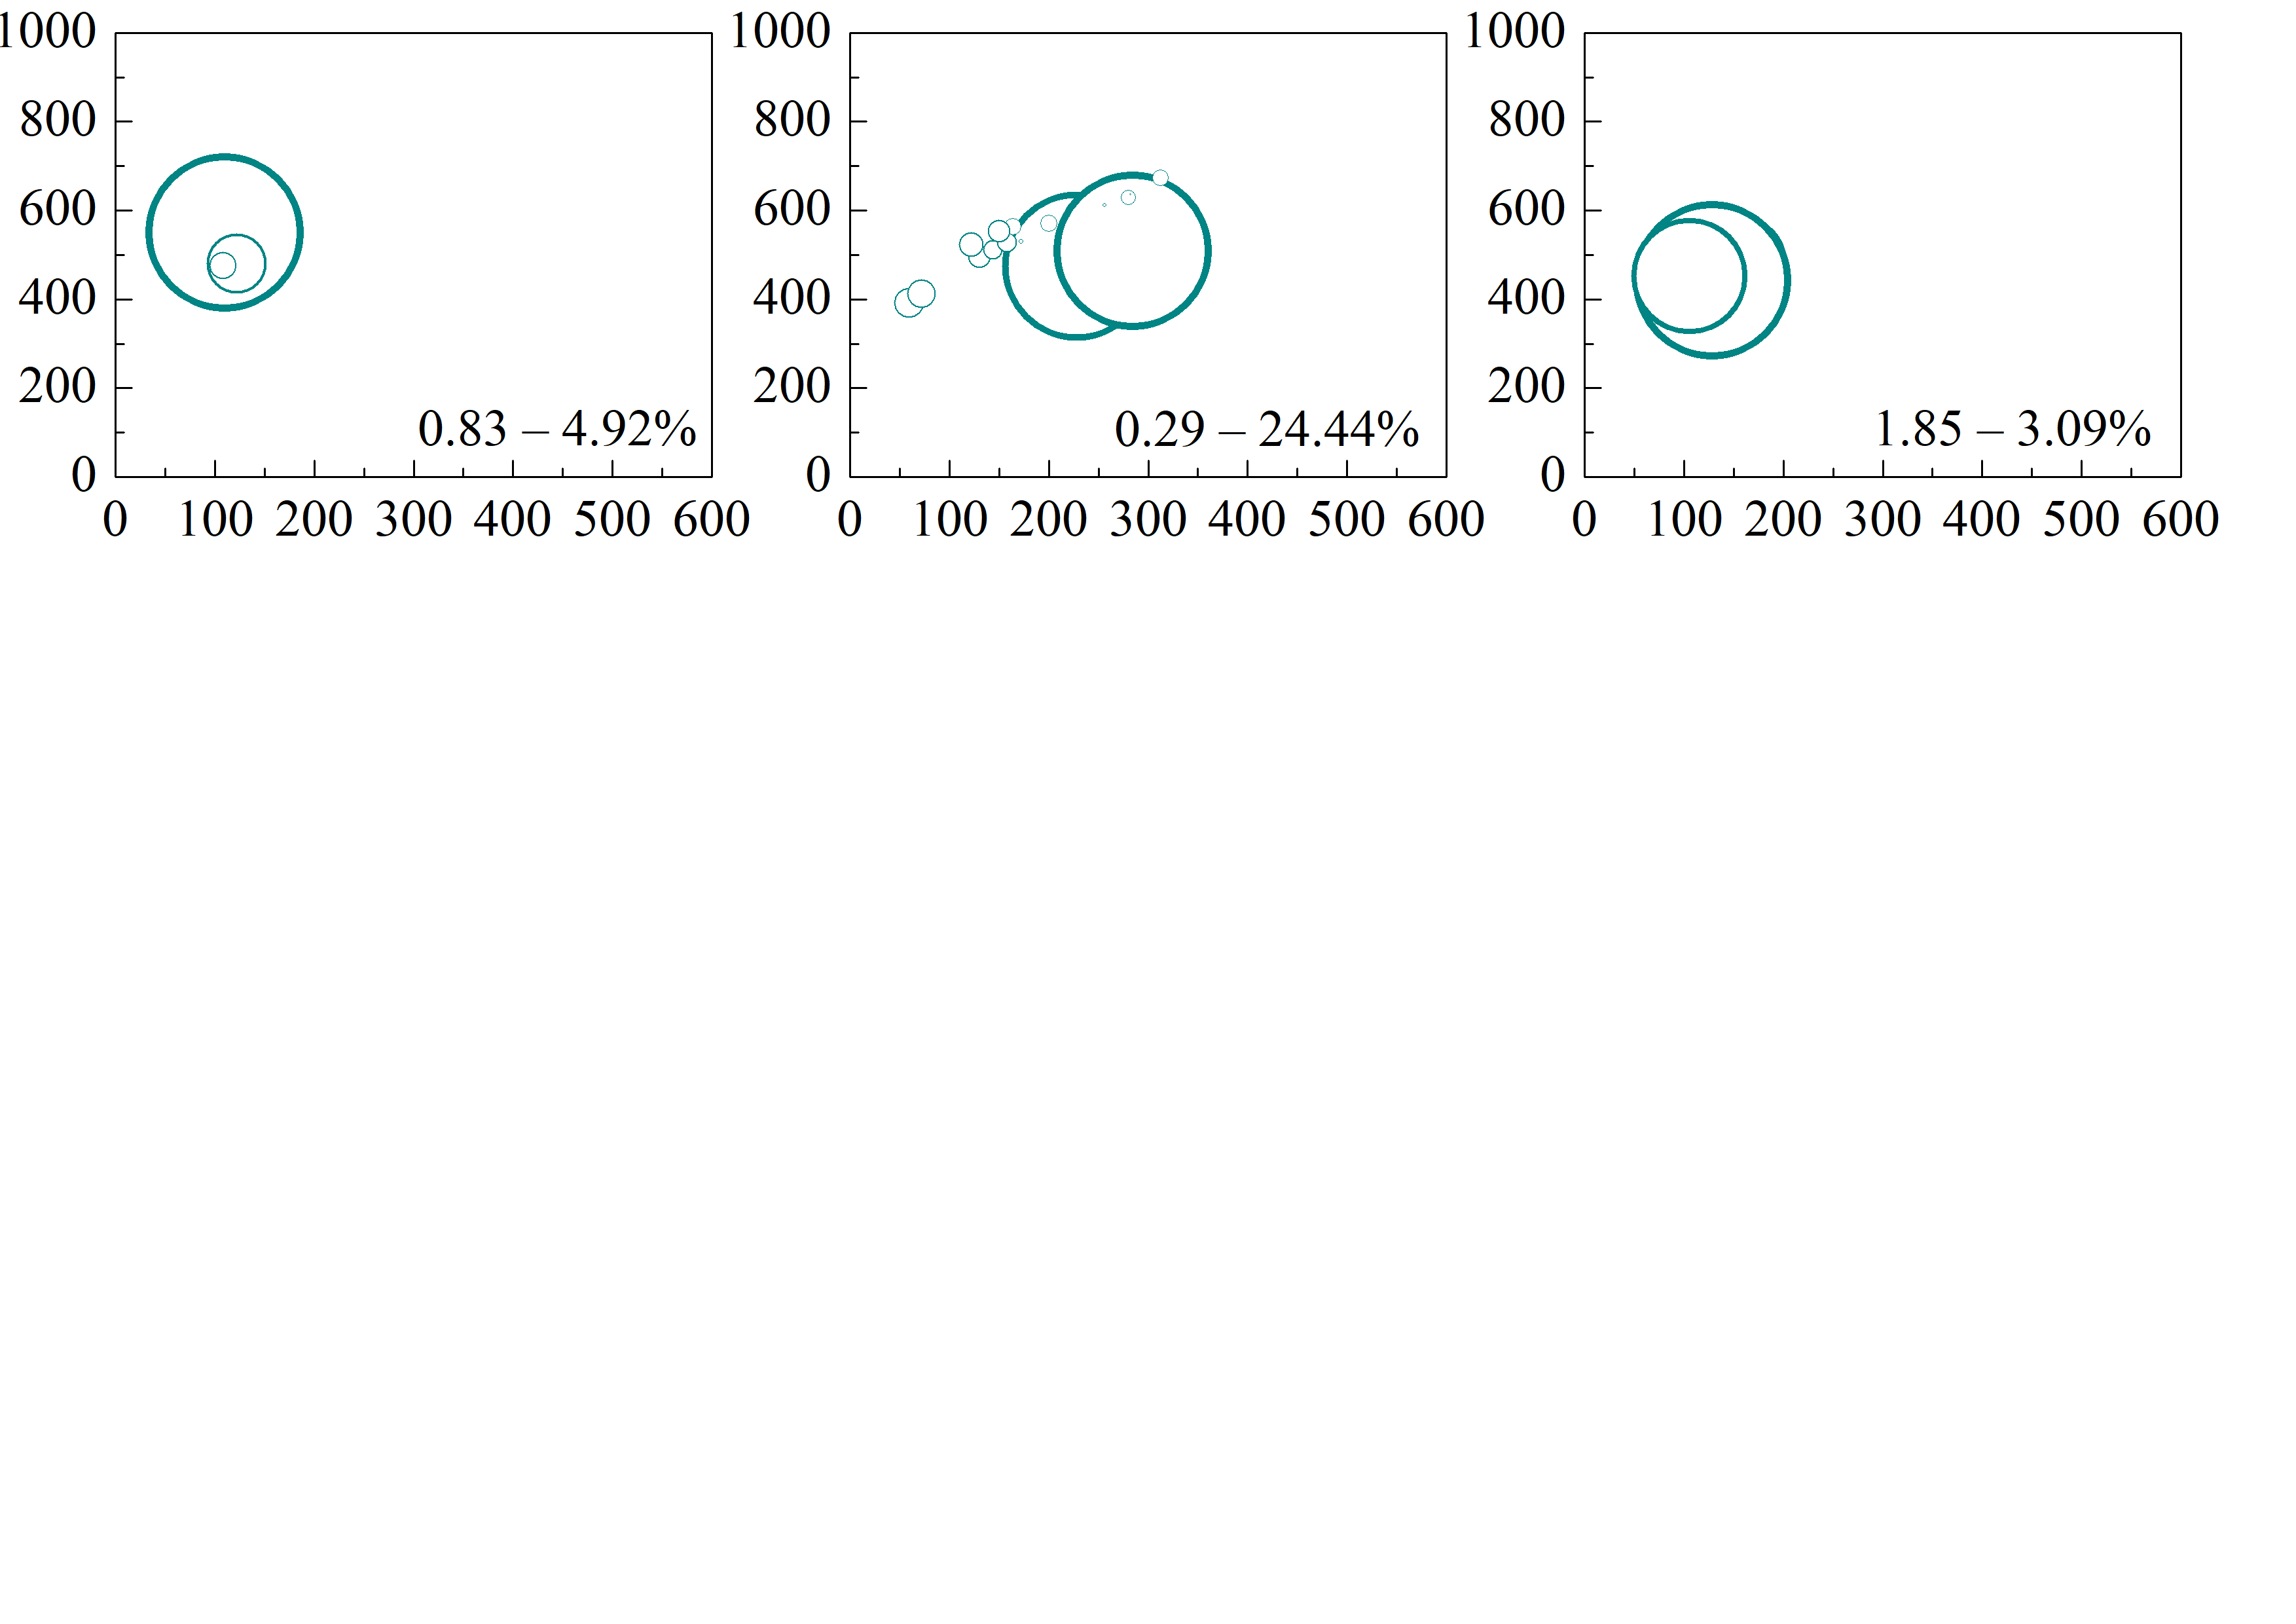* | | | | |
| *j) Ketone* | *k) Ether* | *l) Ester* |
| *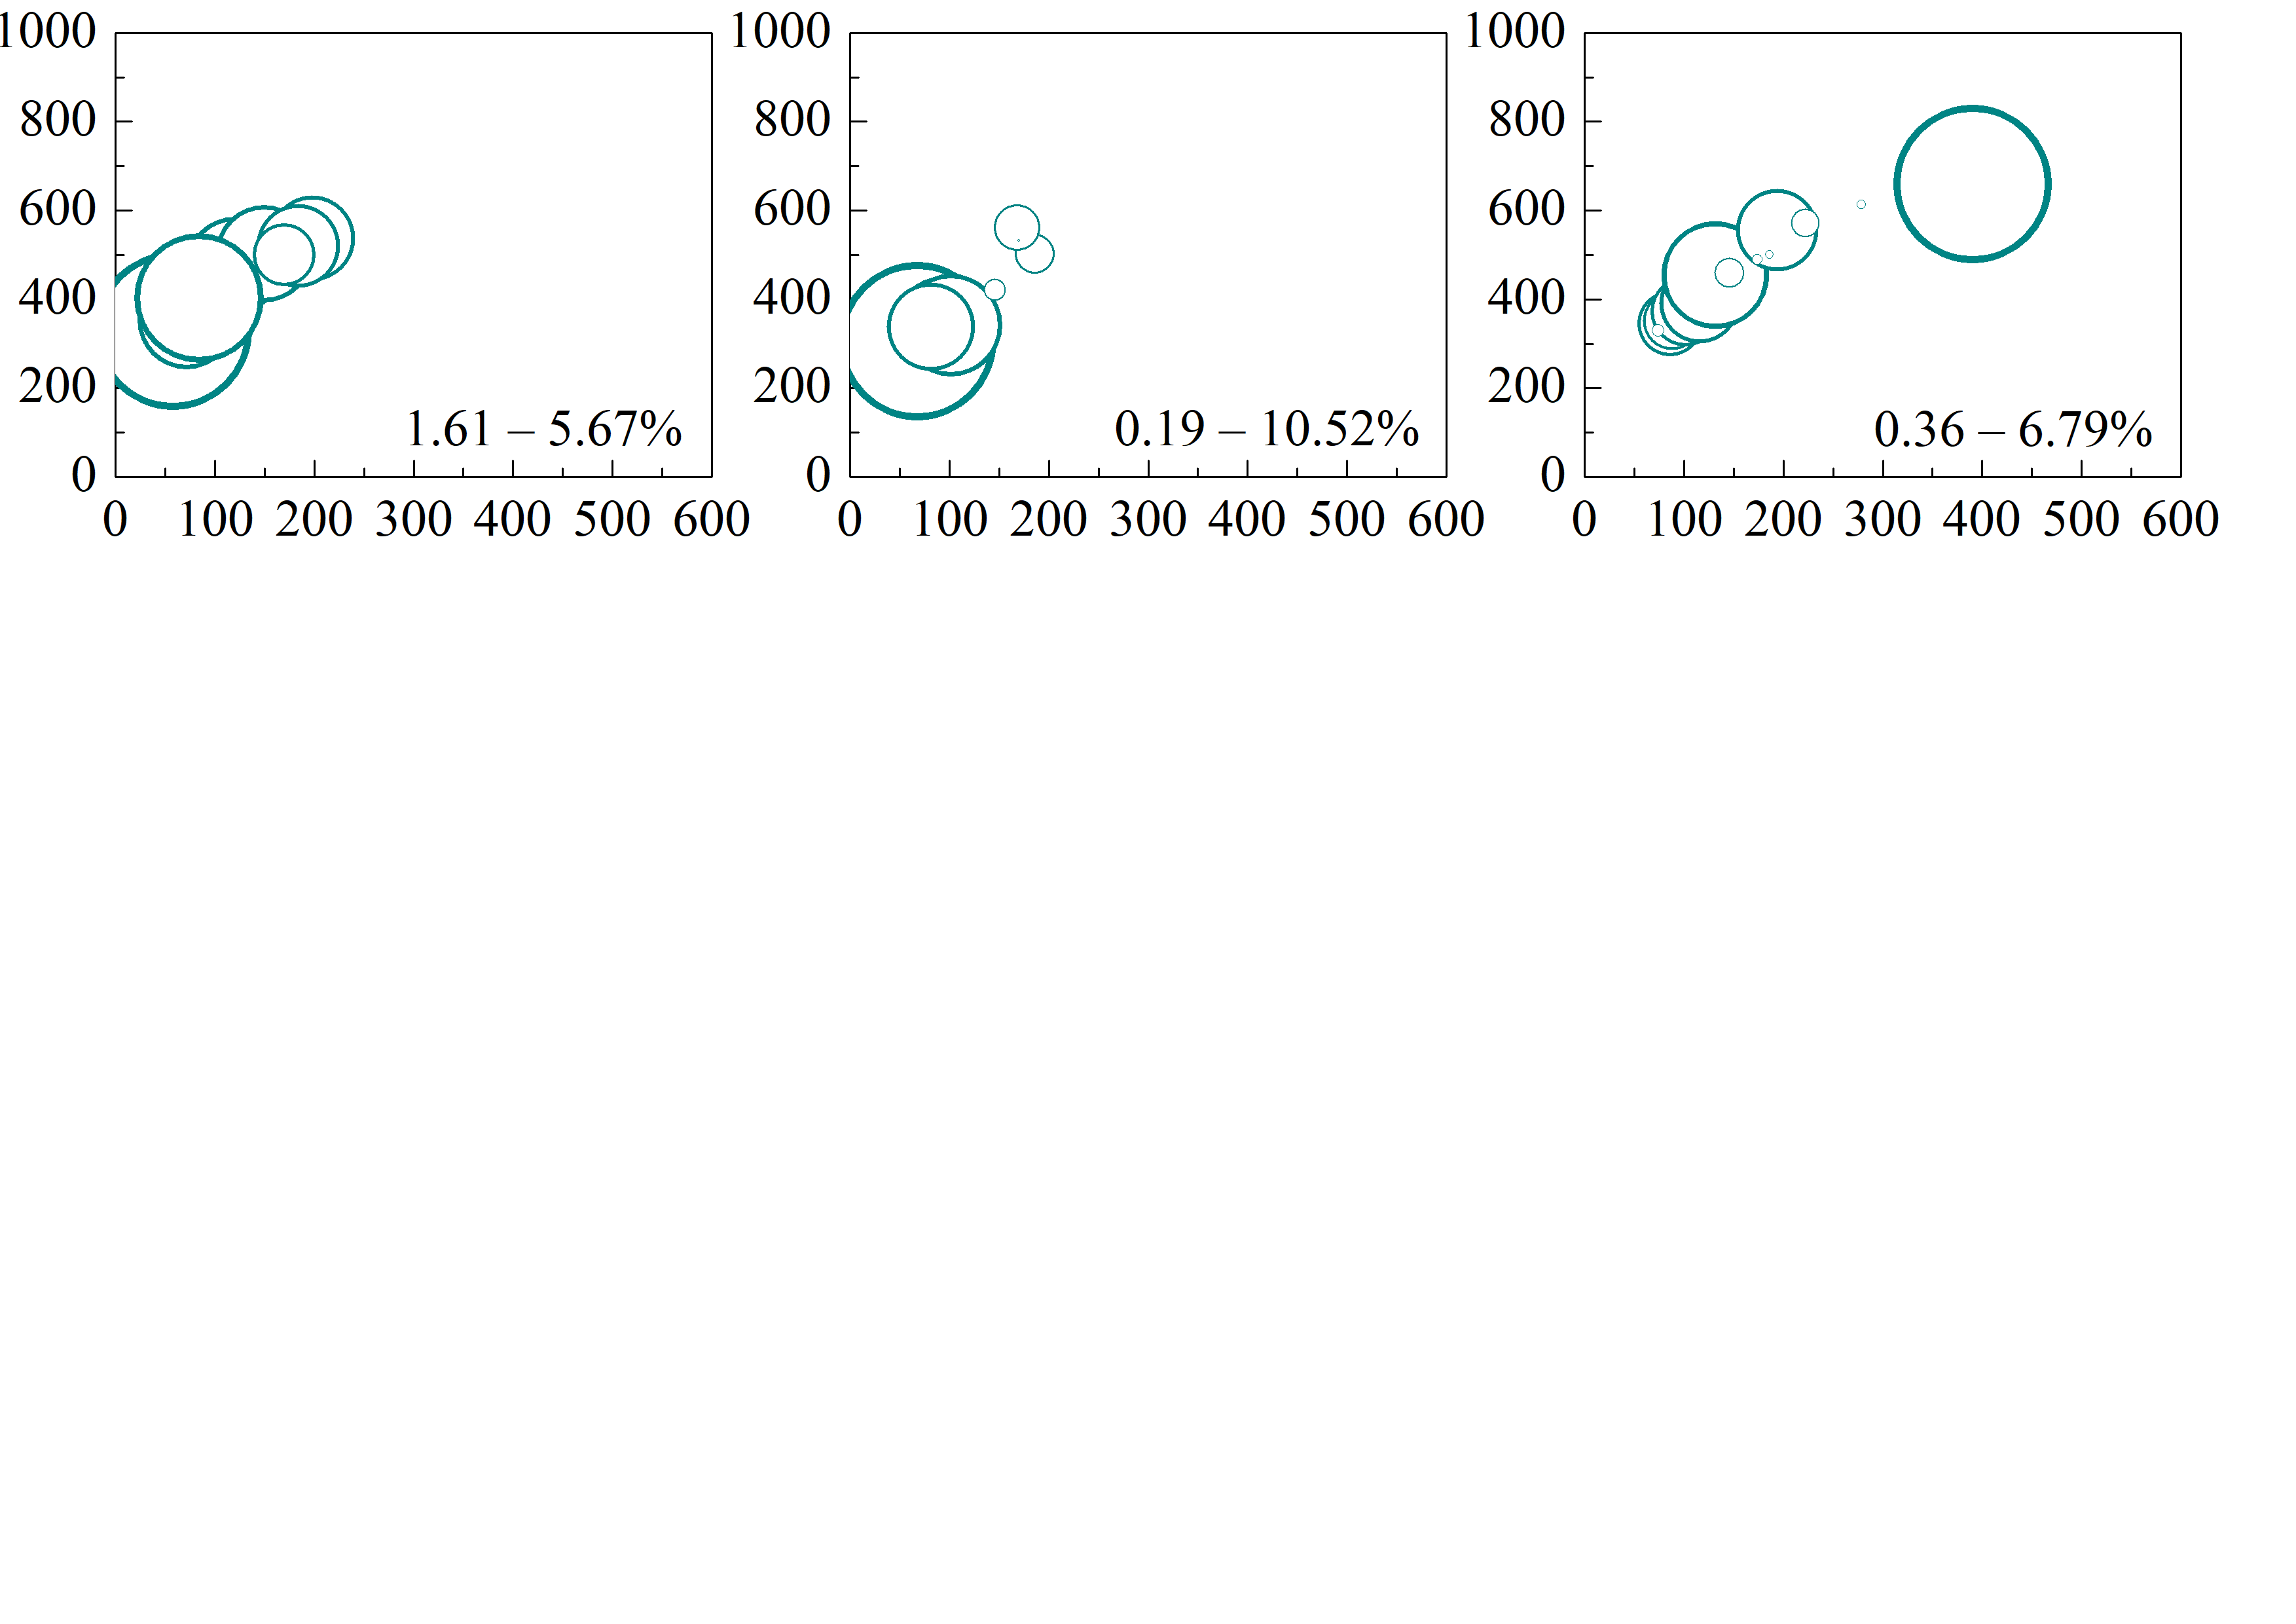* | | | | |
|  | *Molecular weight, g/mol* | | | | |

*ARD* values are shown as a function of *MM* and *Tb* for different families where the magnitude of *ARD* is indicated by the size of the symbol “O”. Compounds with the highest deviations: hexacosane; ethene; 3-methyl-1-butyne; cyclopropane; triphenylene; 1-heptadecanol; 1,3-benzenediol; stearic acid; octanal; acetone; furan; dioctyl-1,2-benzenedicarboxylate.

**Figure S3 (continuation).**

| *Experimental normal boiling point Tb, K* | *a) Nitrogen* | *b) Multifunctional oxygen* | *c) Chlorine* |
| --- | --- | --- | --- |
| *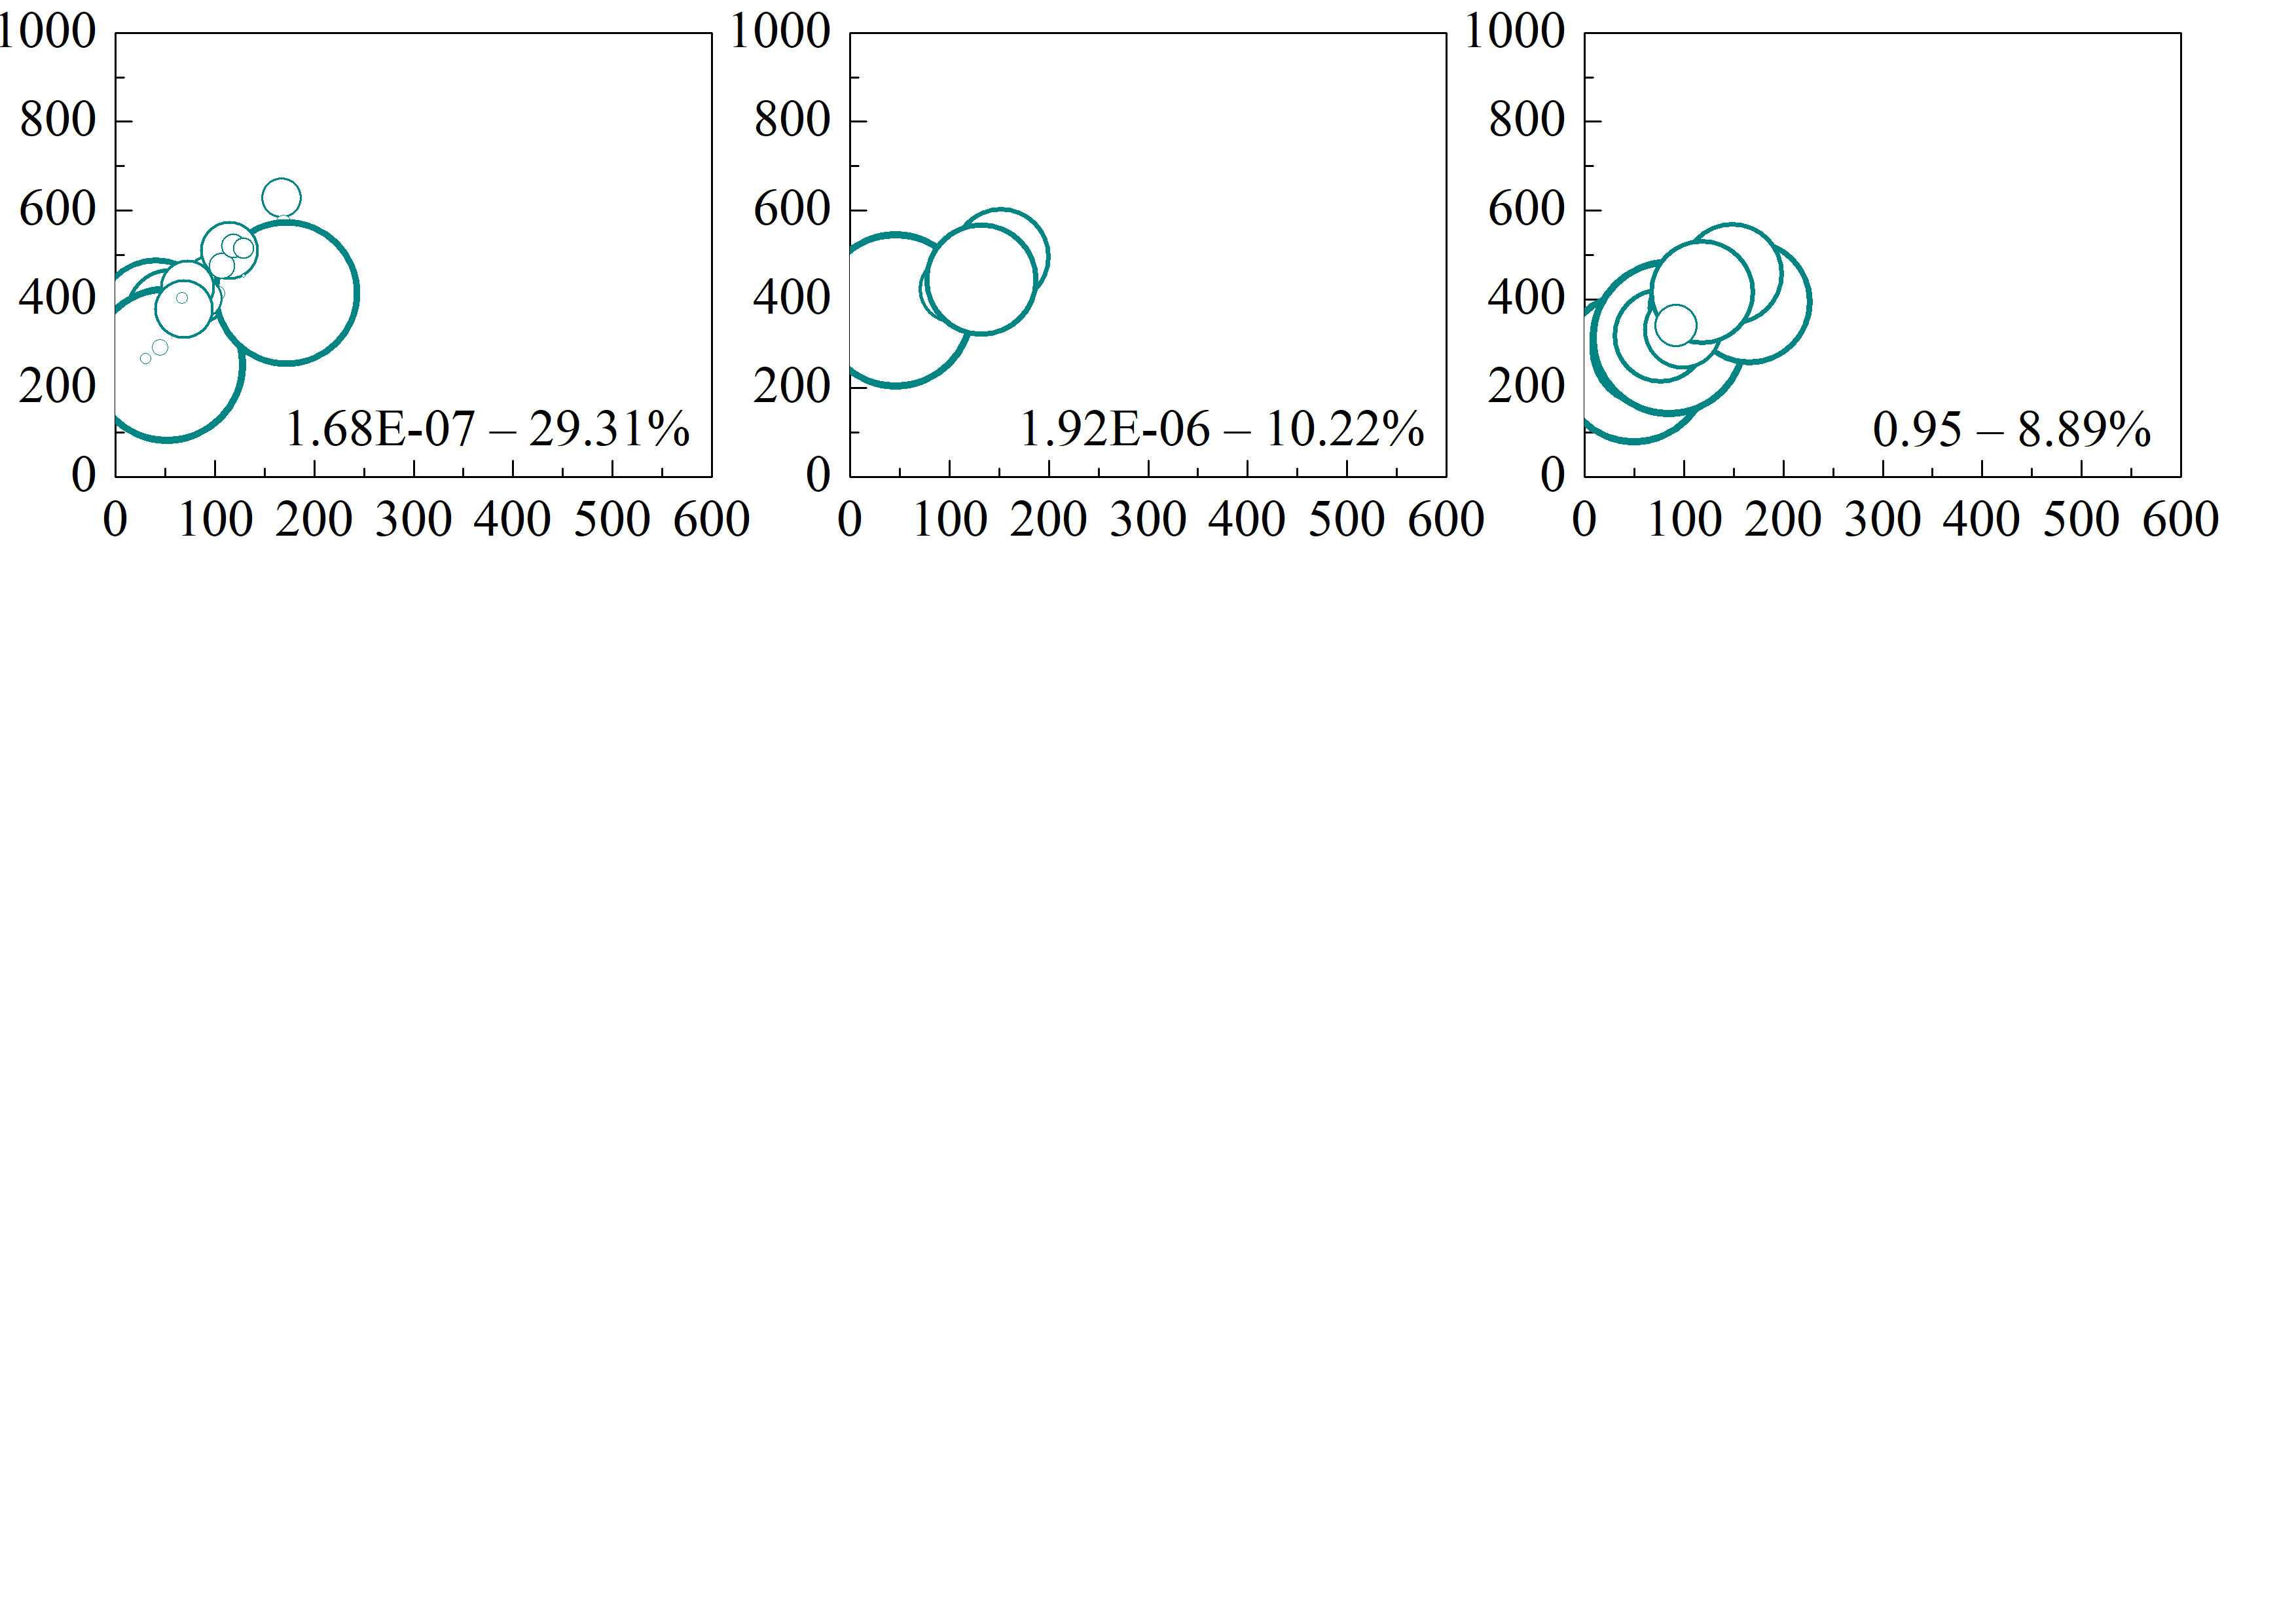* | | | |
| *d) Fluorine* | *e) Bromine* | *f) Iodine* |
| *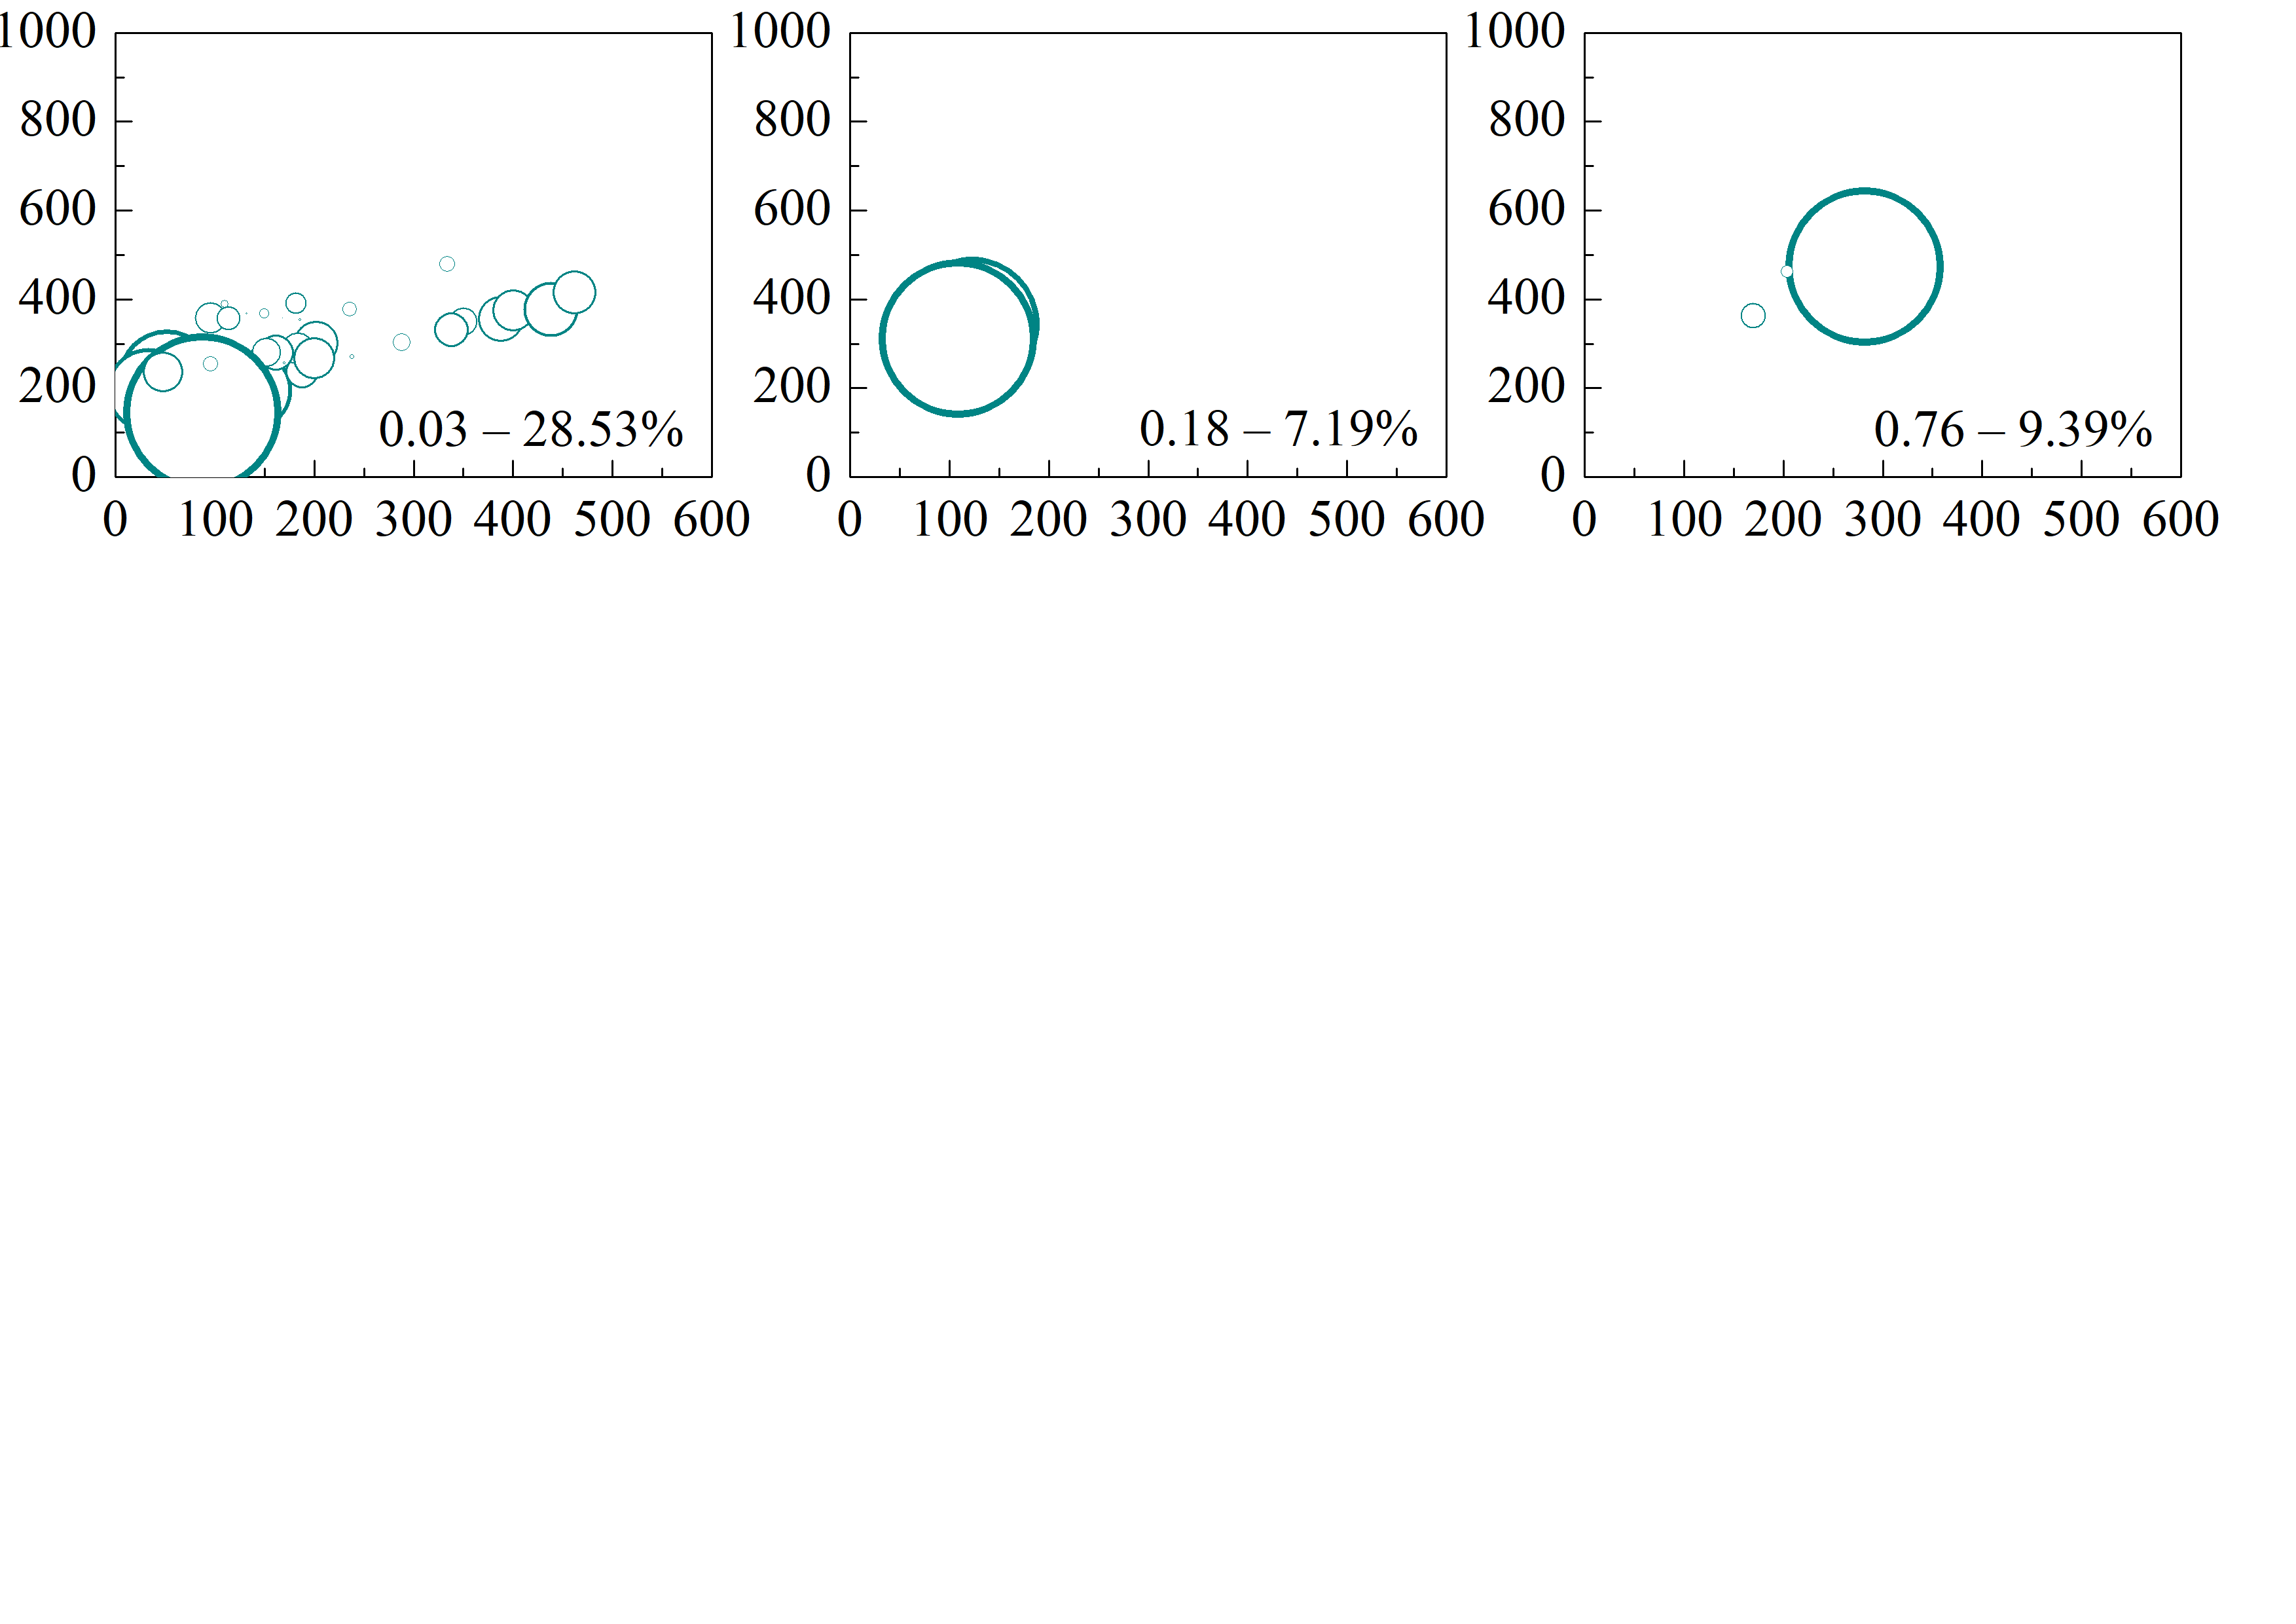* | | | |
| *g) Other halogenated* | *h) Sulfur* | *i) Silicon* |
| *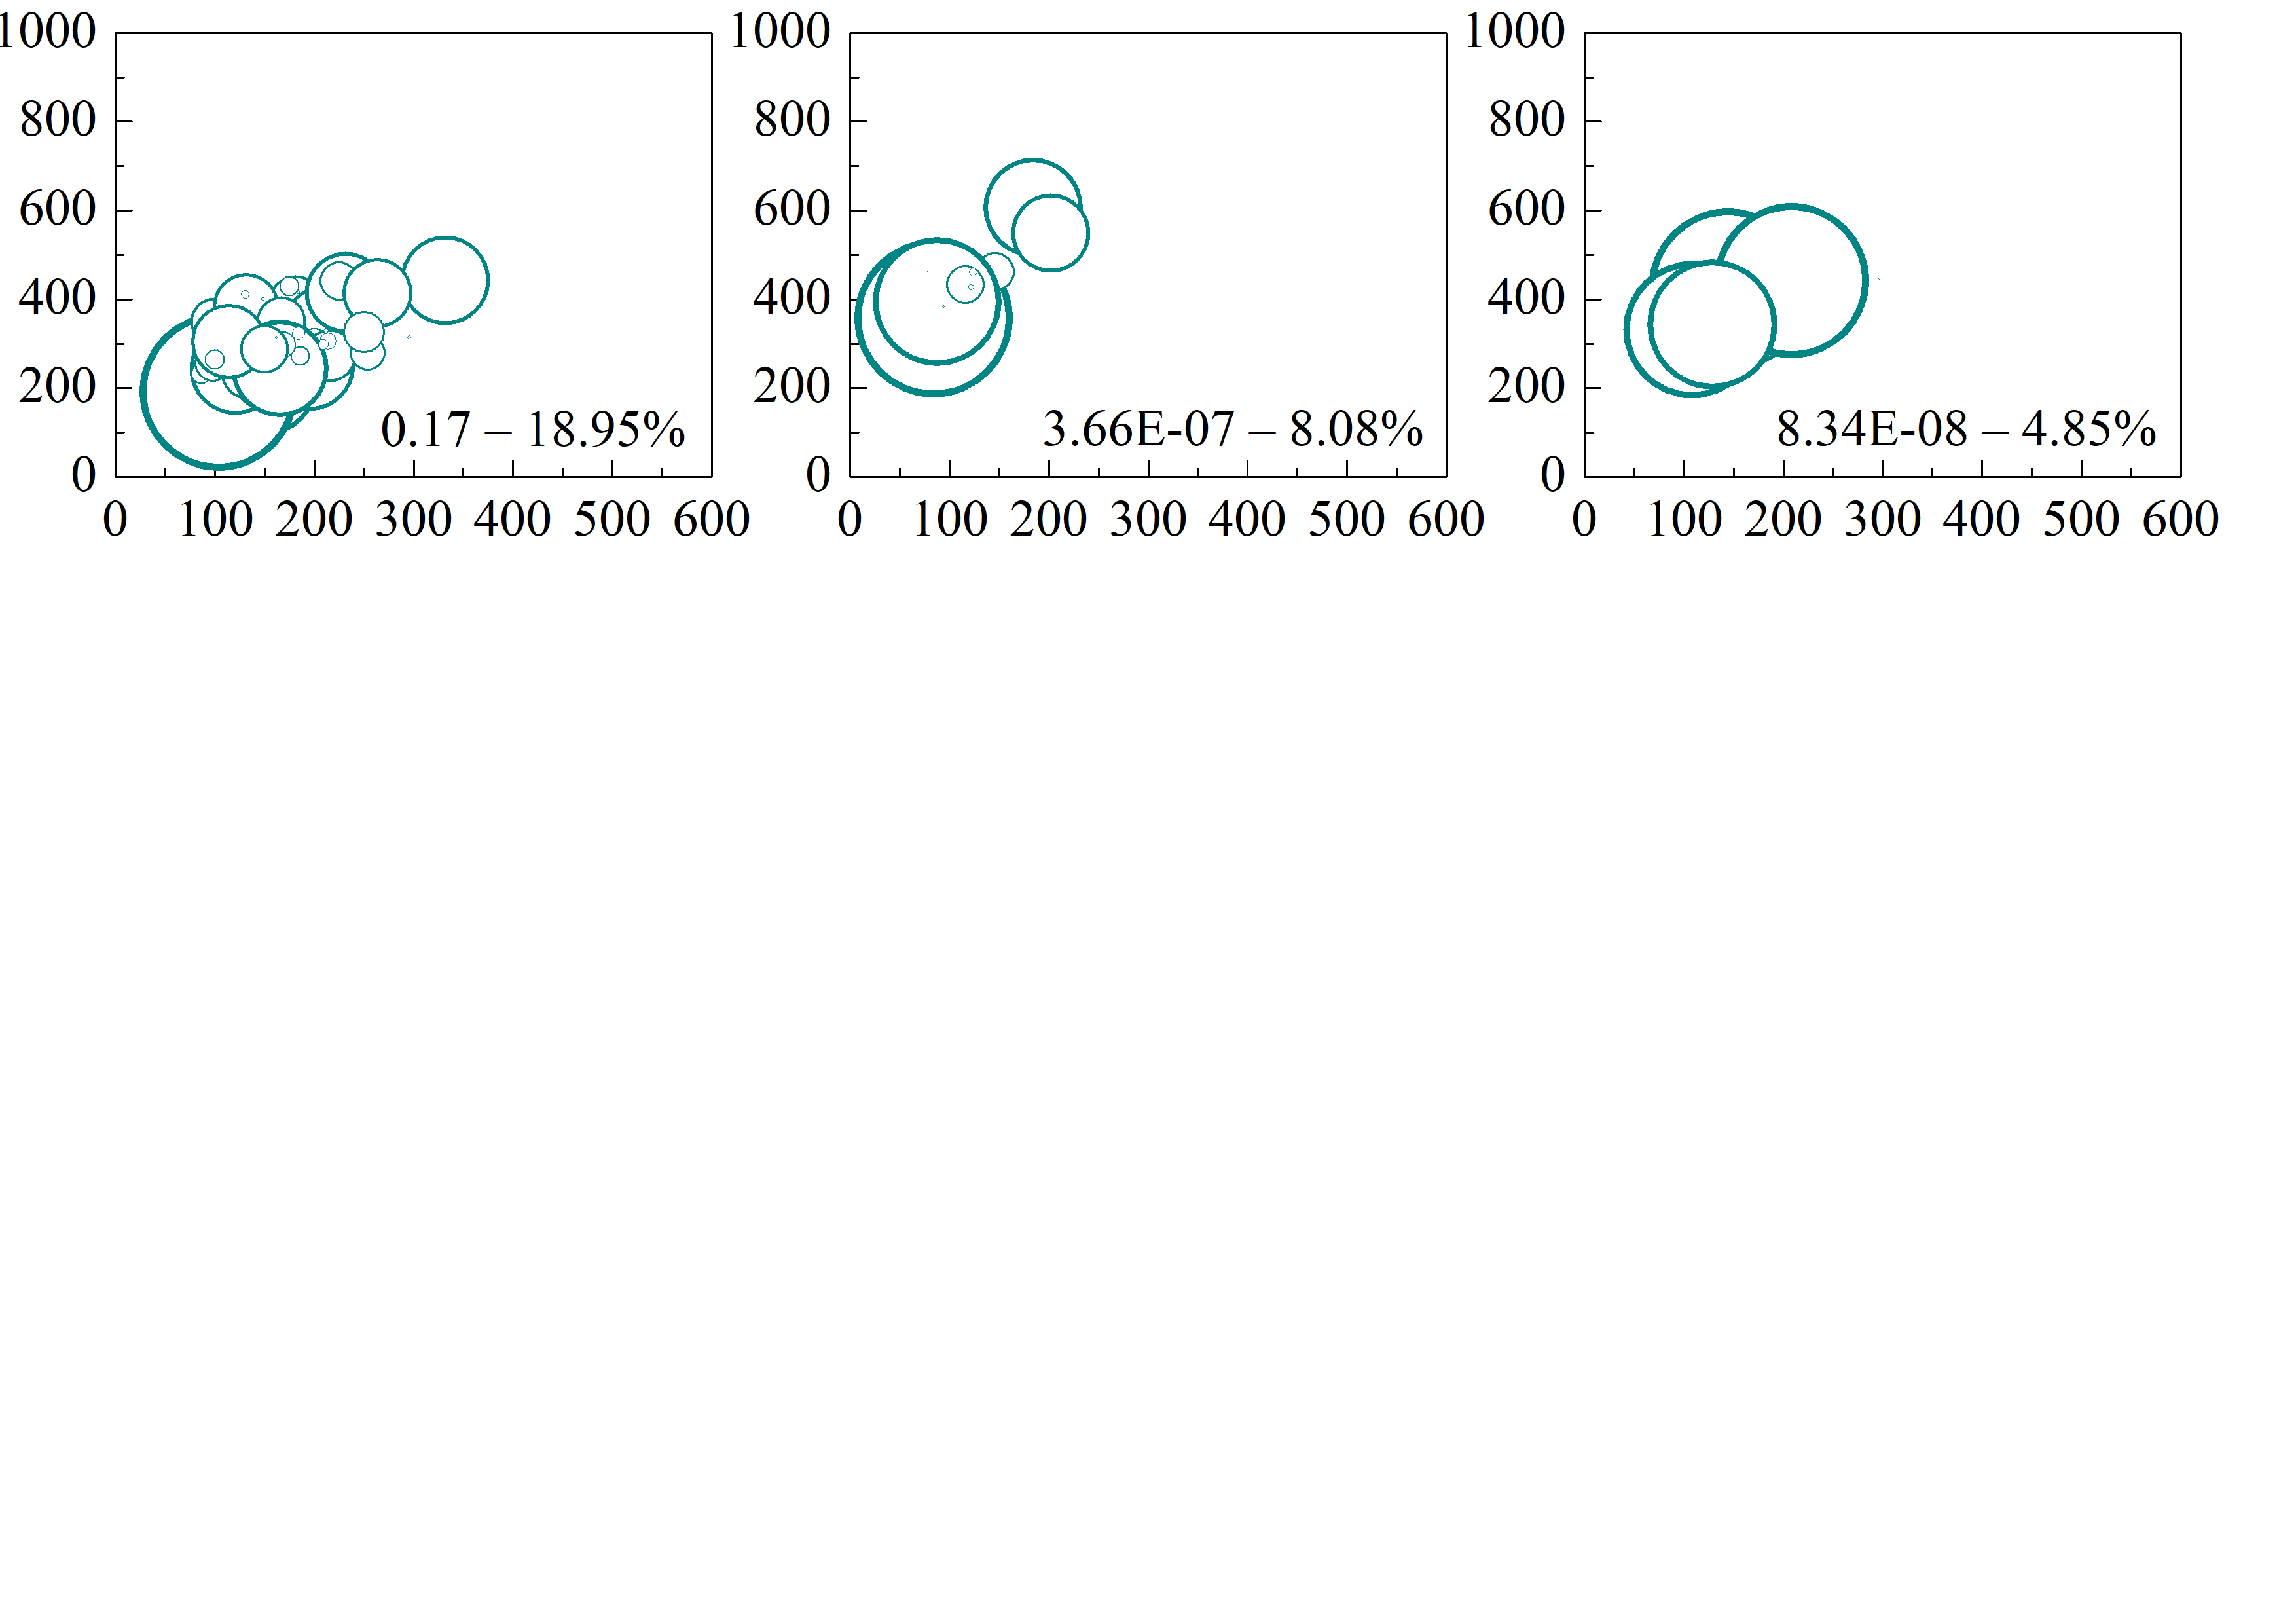* | | | |
|  | *Molecular weight, g/mol* | | | |

Compounds with the highest deviations: ethanedinitrile; methanoic acid; dichloromethane; tetrafluoromethane; bromoethane; 1,2-diiodoethane; chlorotrifluoromethane; thiophene; tetraethylsilane.

**Figure S4.** *ARD* for the calculation of critical temperature with *MTC4* model. The diameter of symbol “O” is directly associated with *ARD* magnitude.

| *Experimental critical temperature Tc, K* | *a) Alkane* | *b) Alkene* | | | *c) Alkyne* | | |
| --- | --- | --- | --- | --- | --- | --- | --- |
| *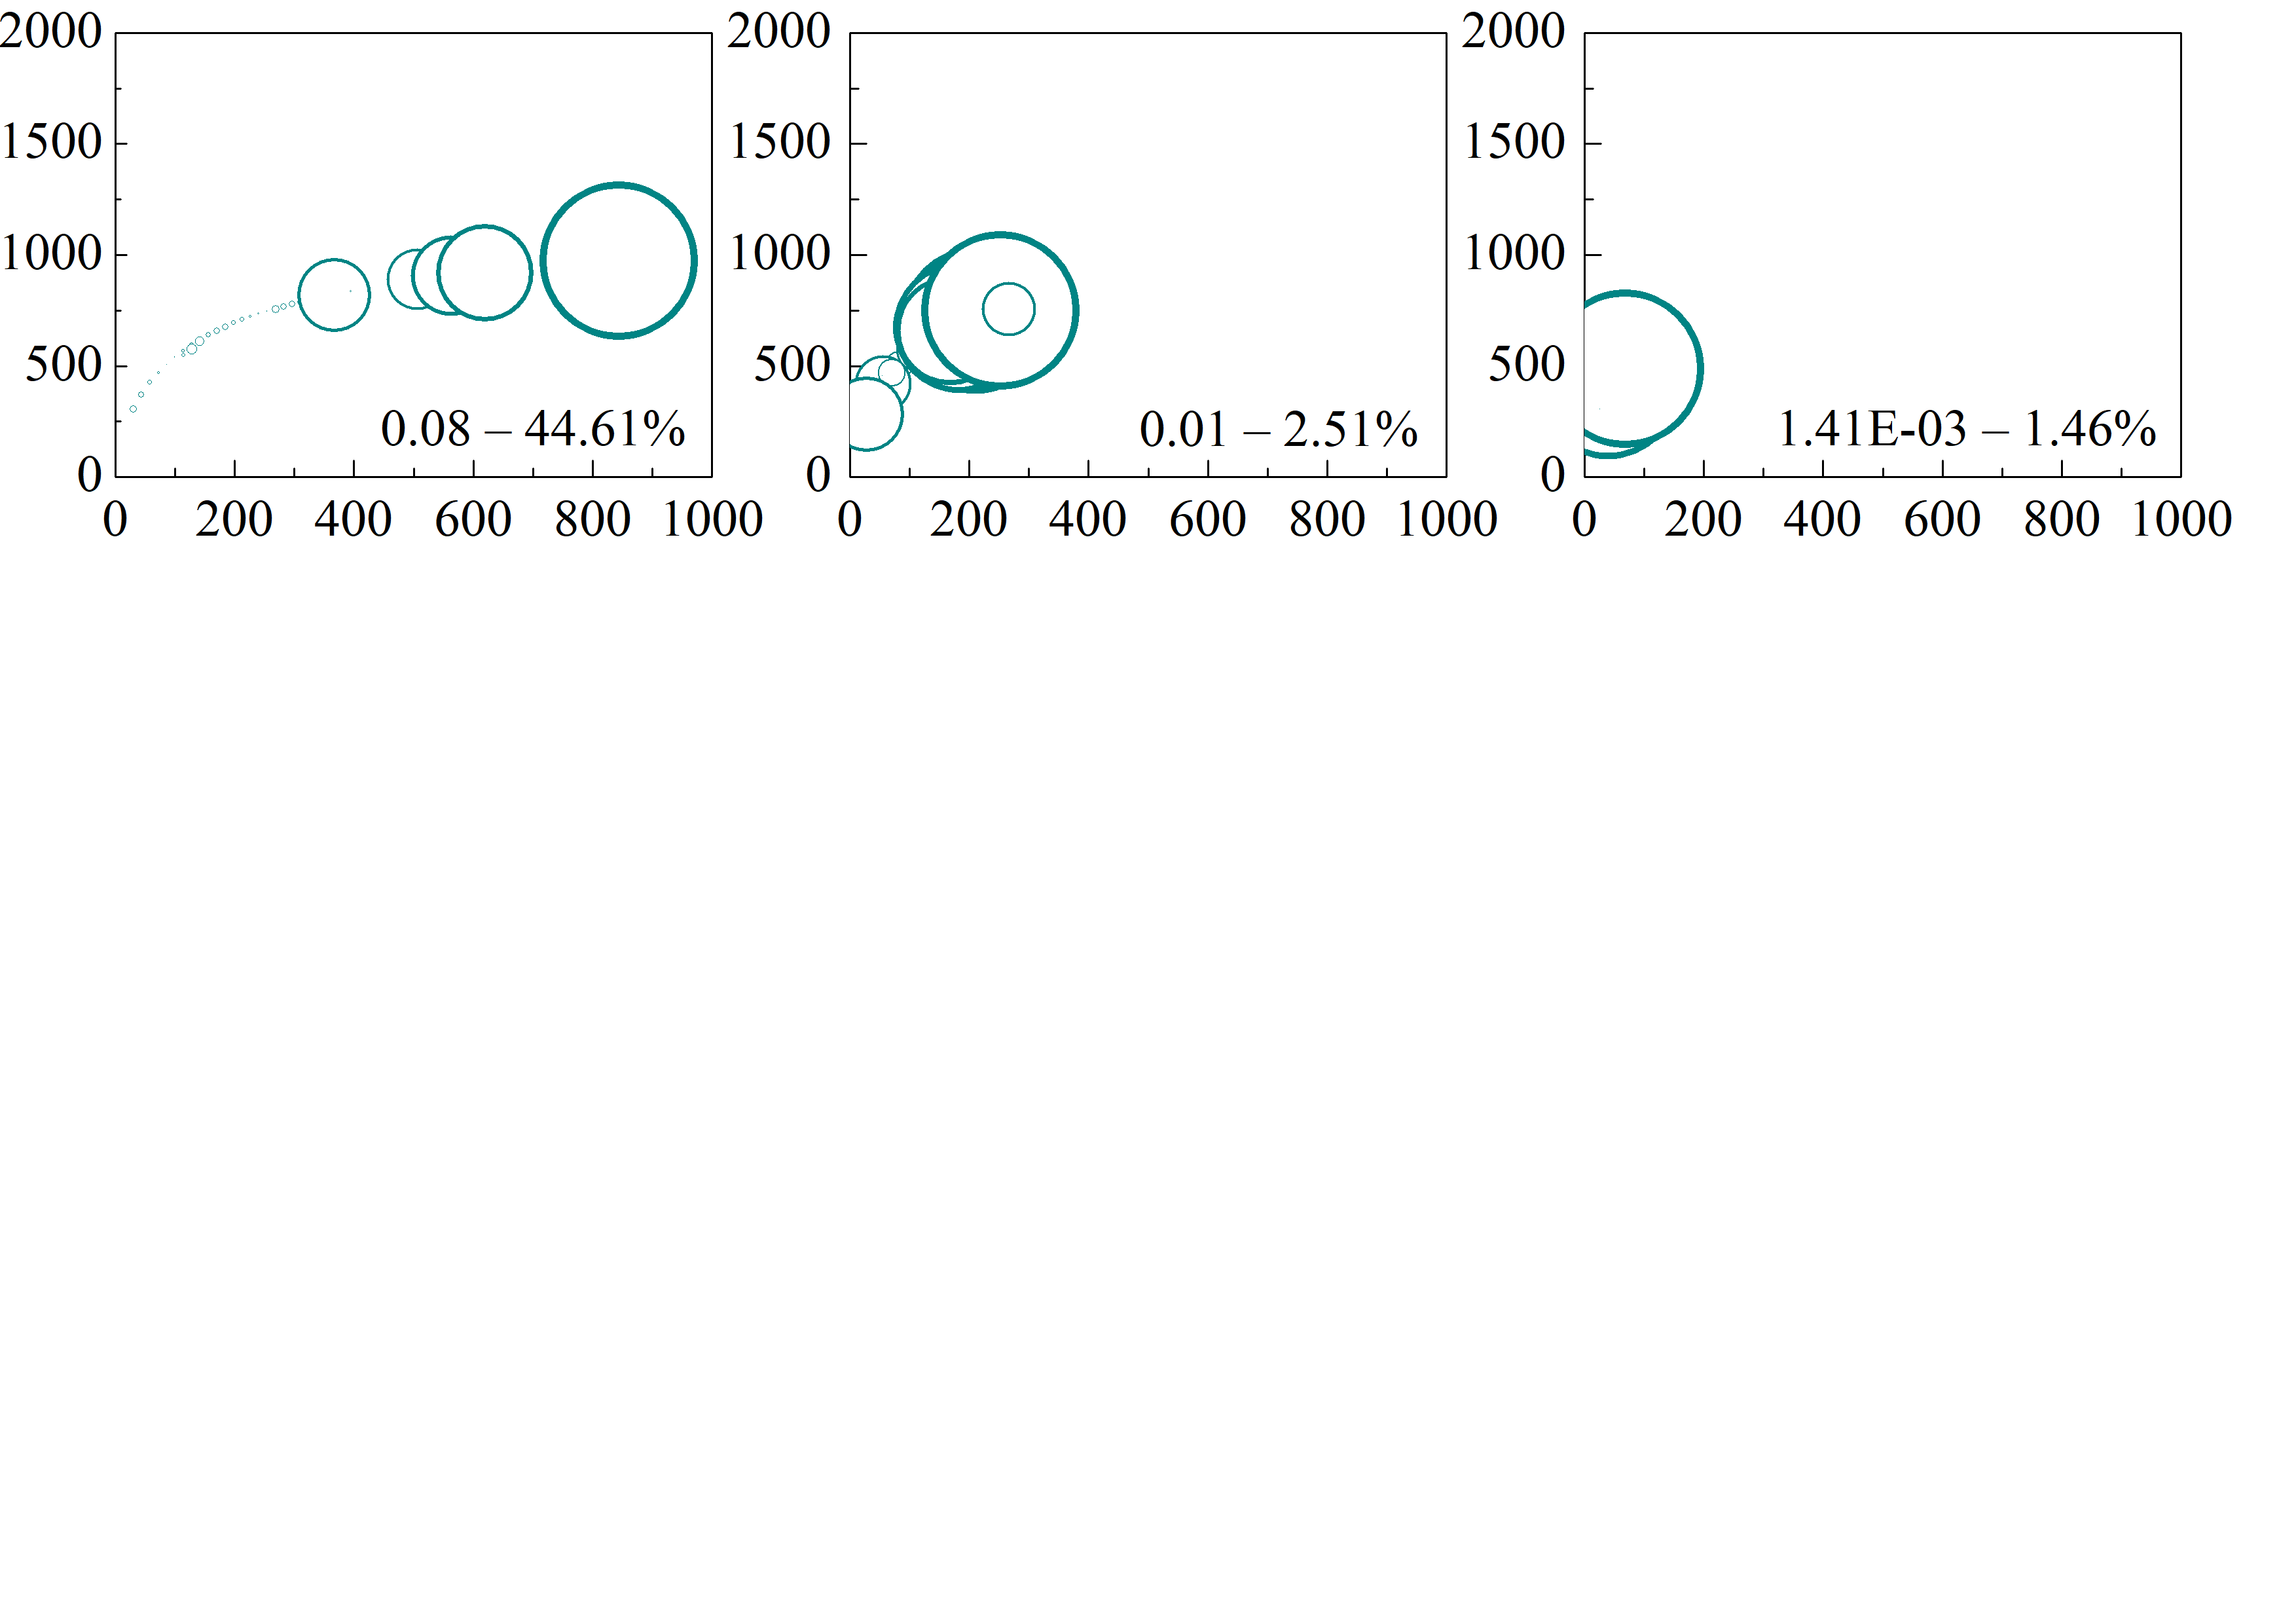* | | | | | | |
| *d) Cyclic hydrocarbon* | *e) Aromatic hydrocarbon* | | | *f) Alcohol* | | |
| *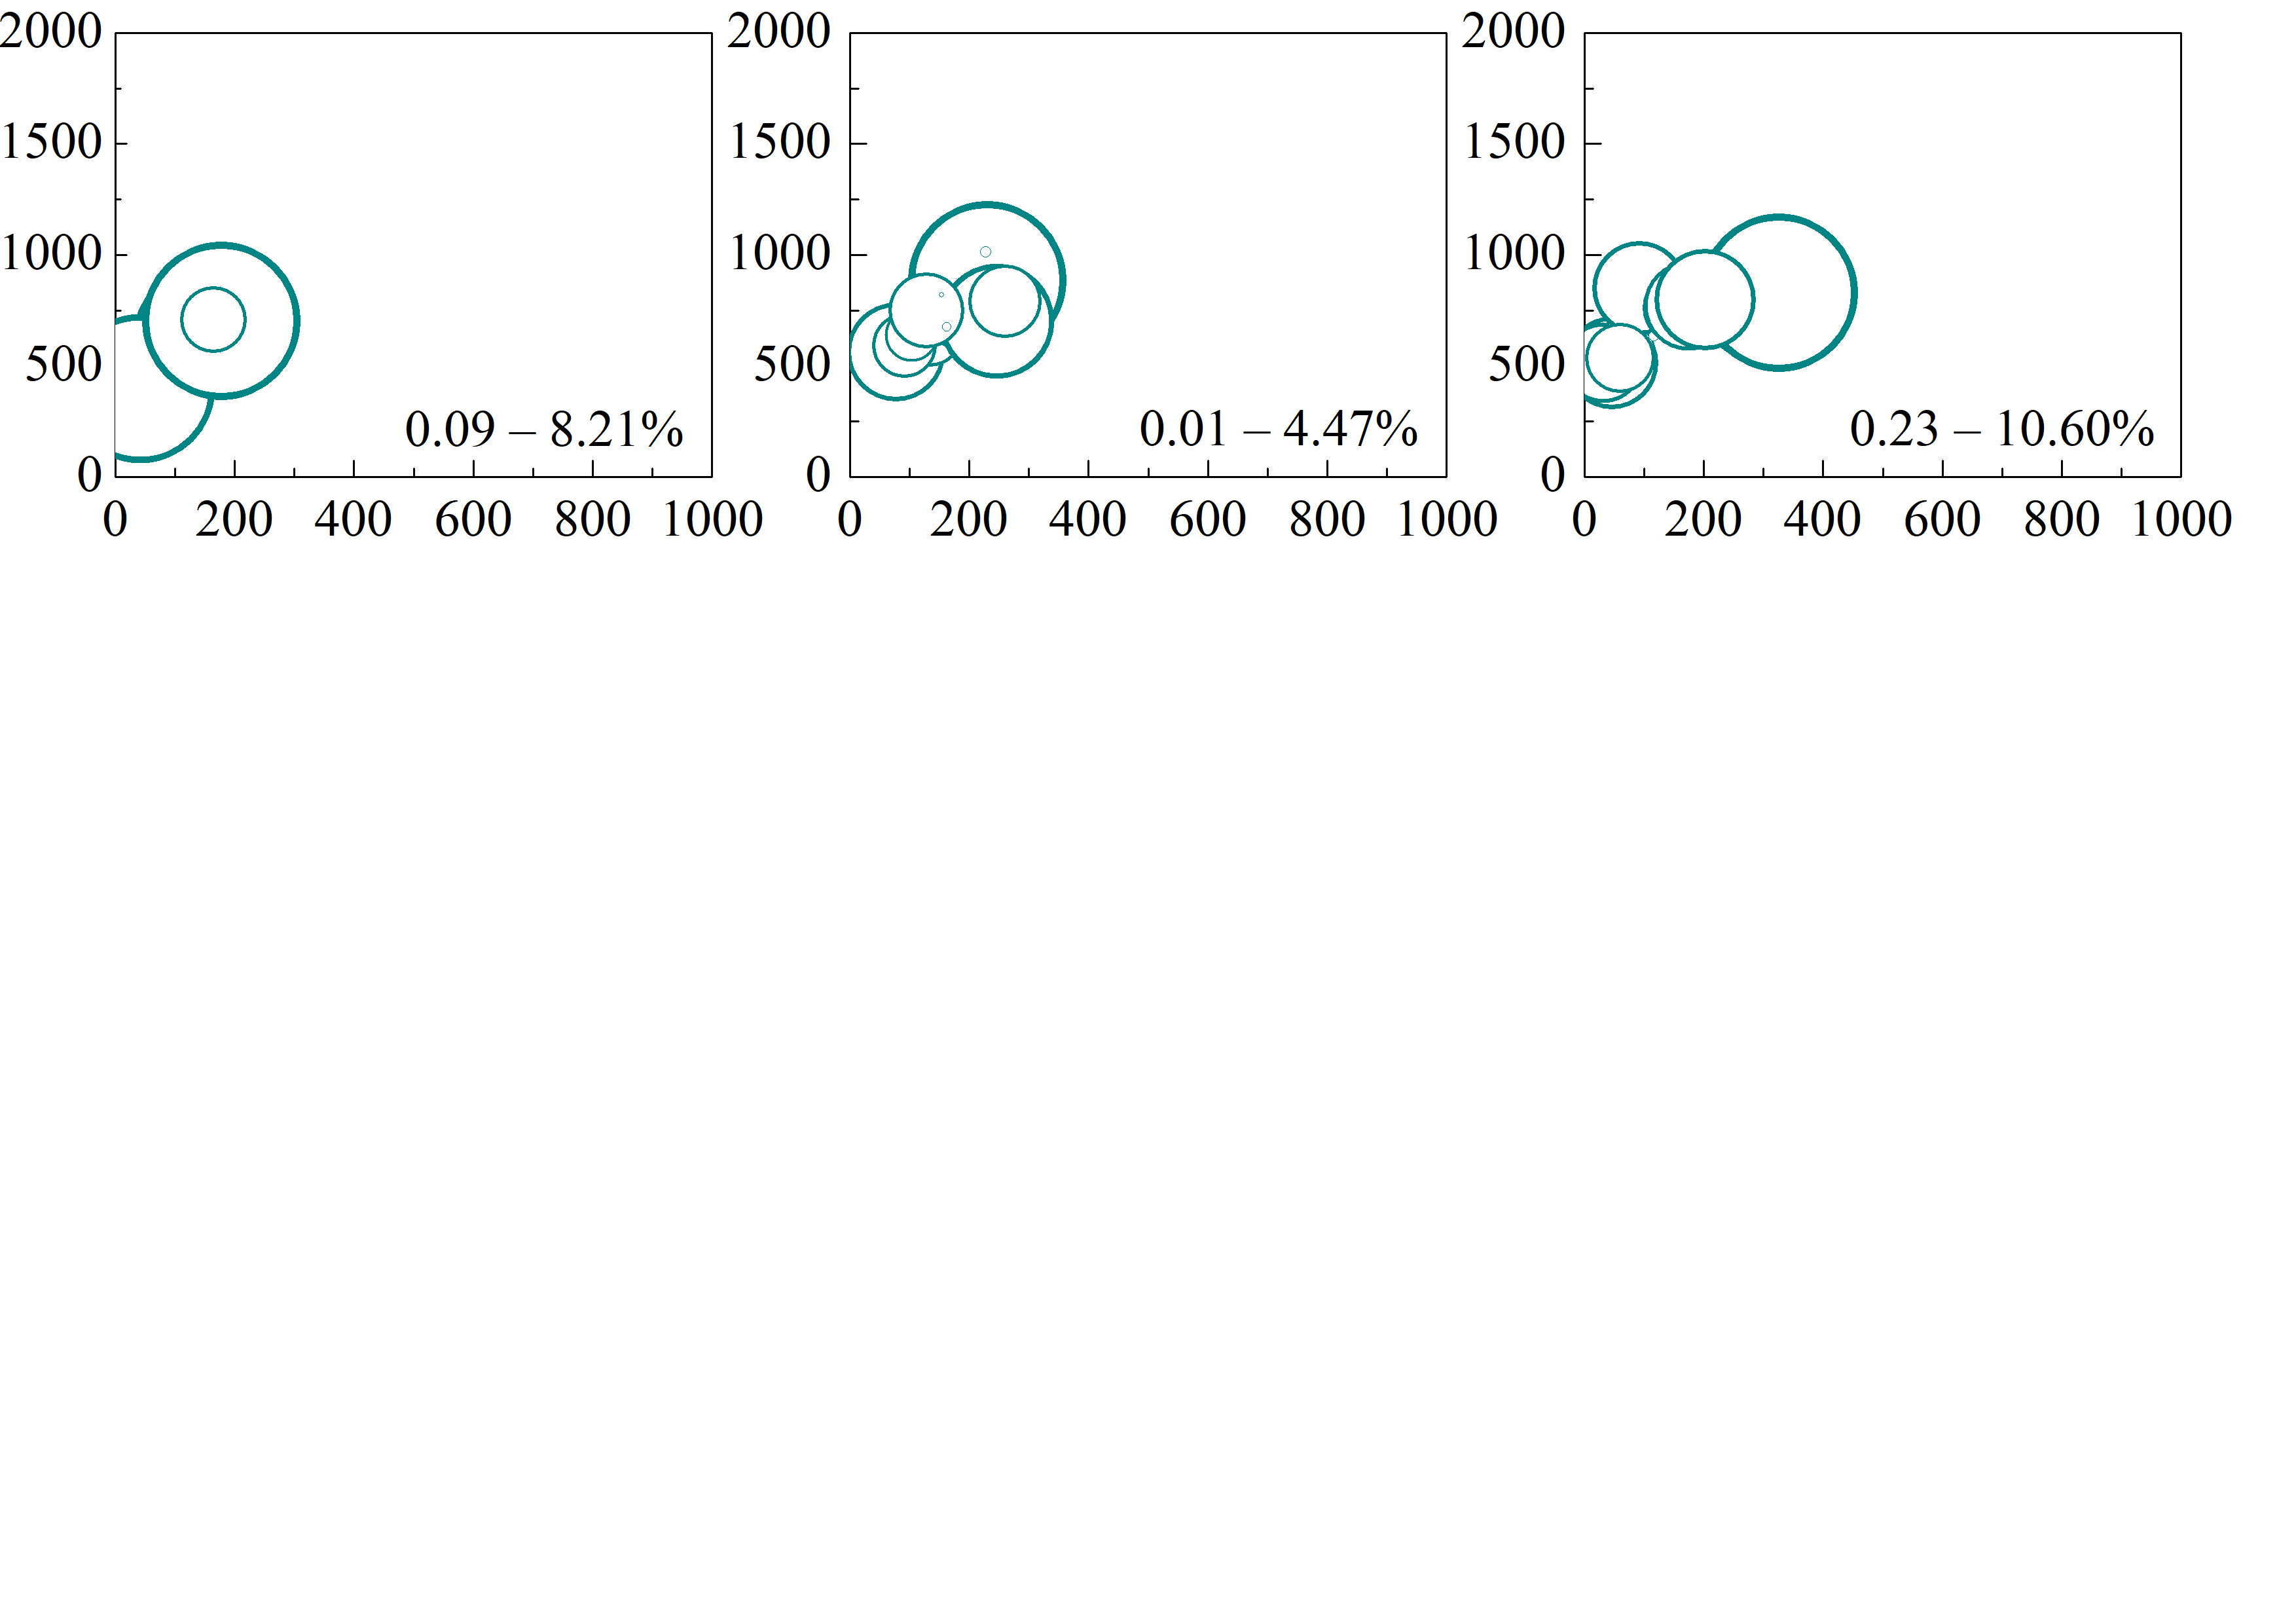* | | | | | | |
| *g) Phenol* | *h) Carboxylic acid* | | *i) Aldehyde* | | |
| *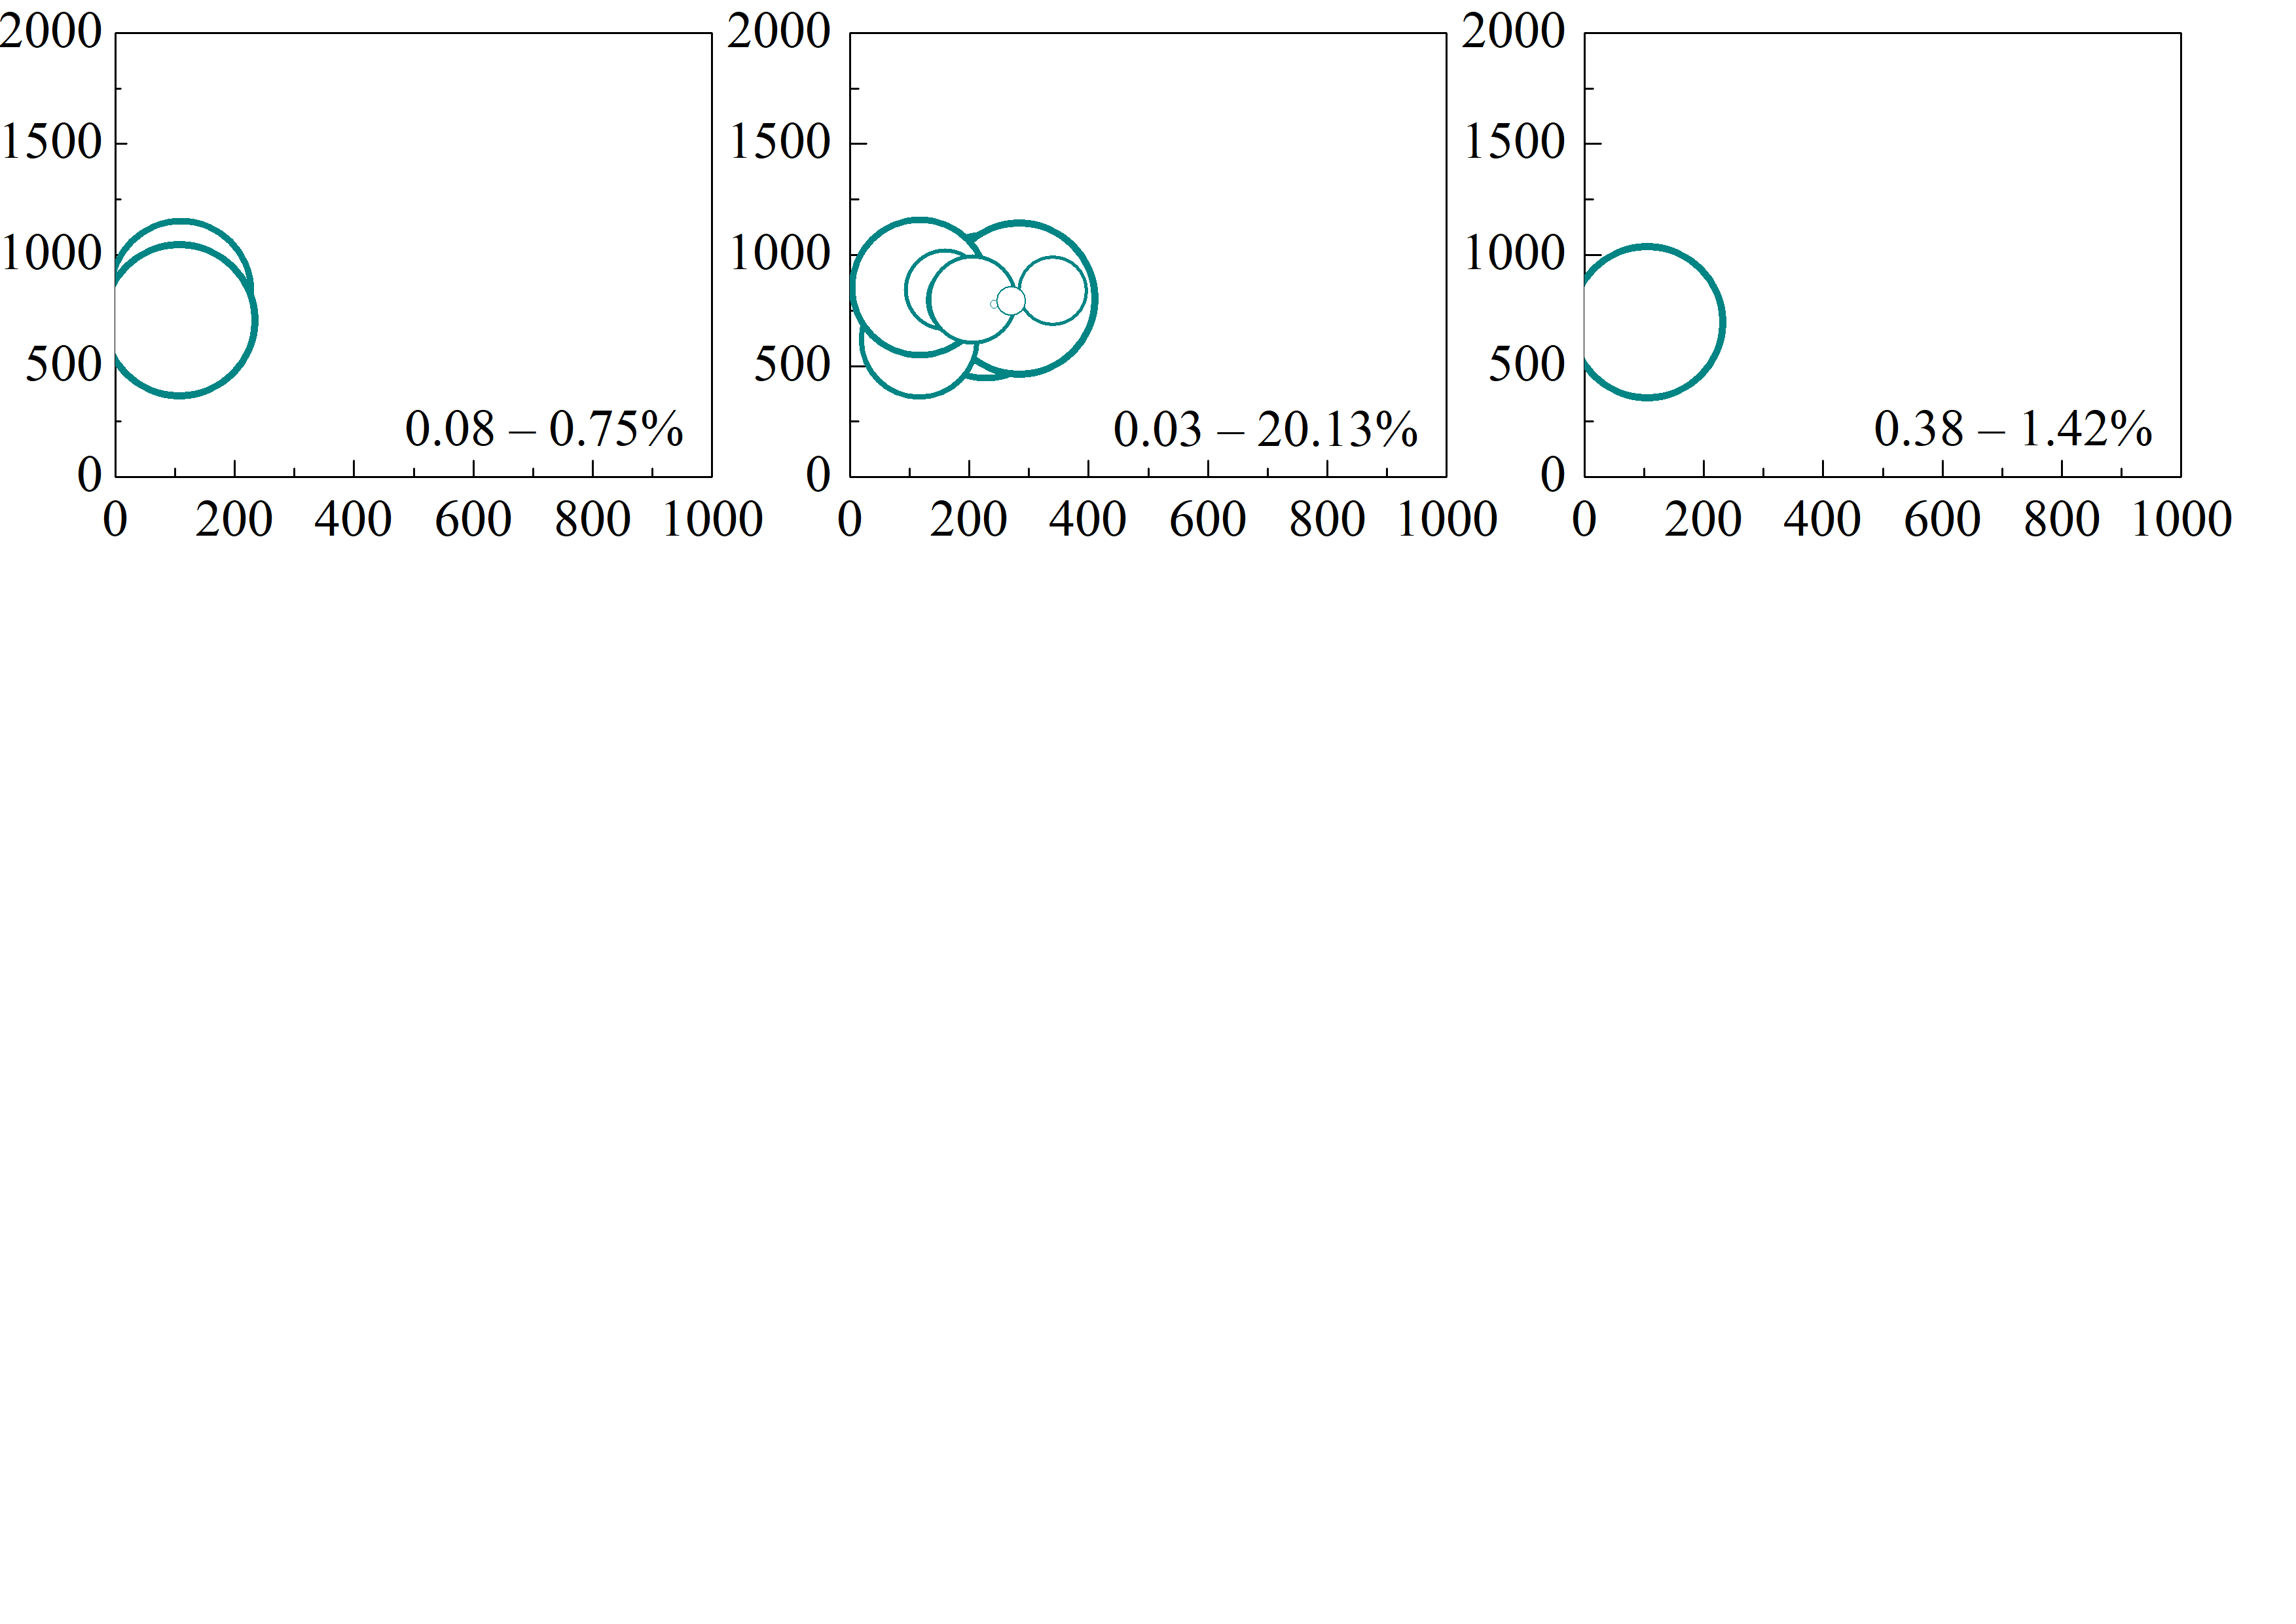* | | | | | | |
| *j) Ketone* | *k) Ether* | *l) Ester* | | |
| *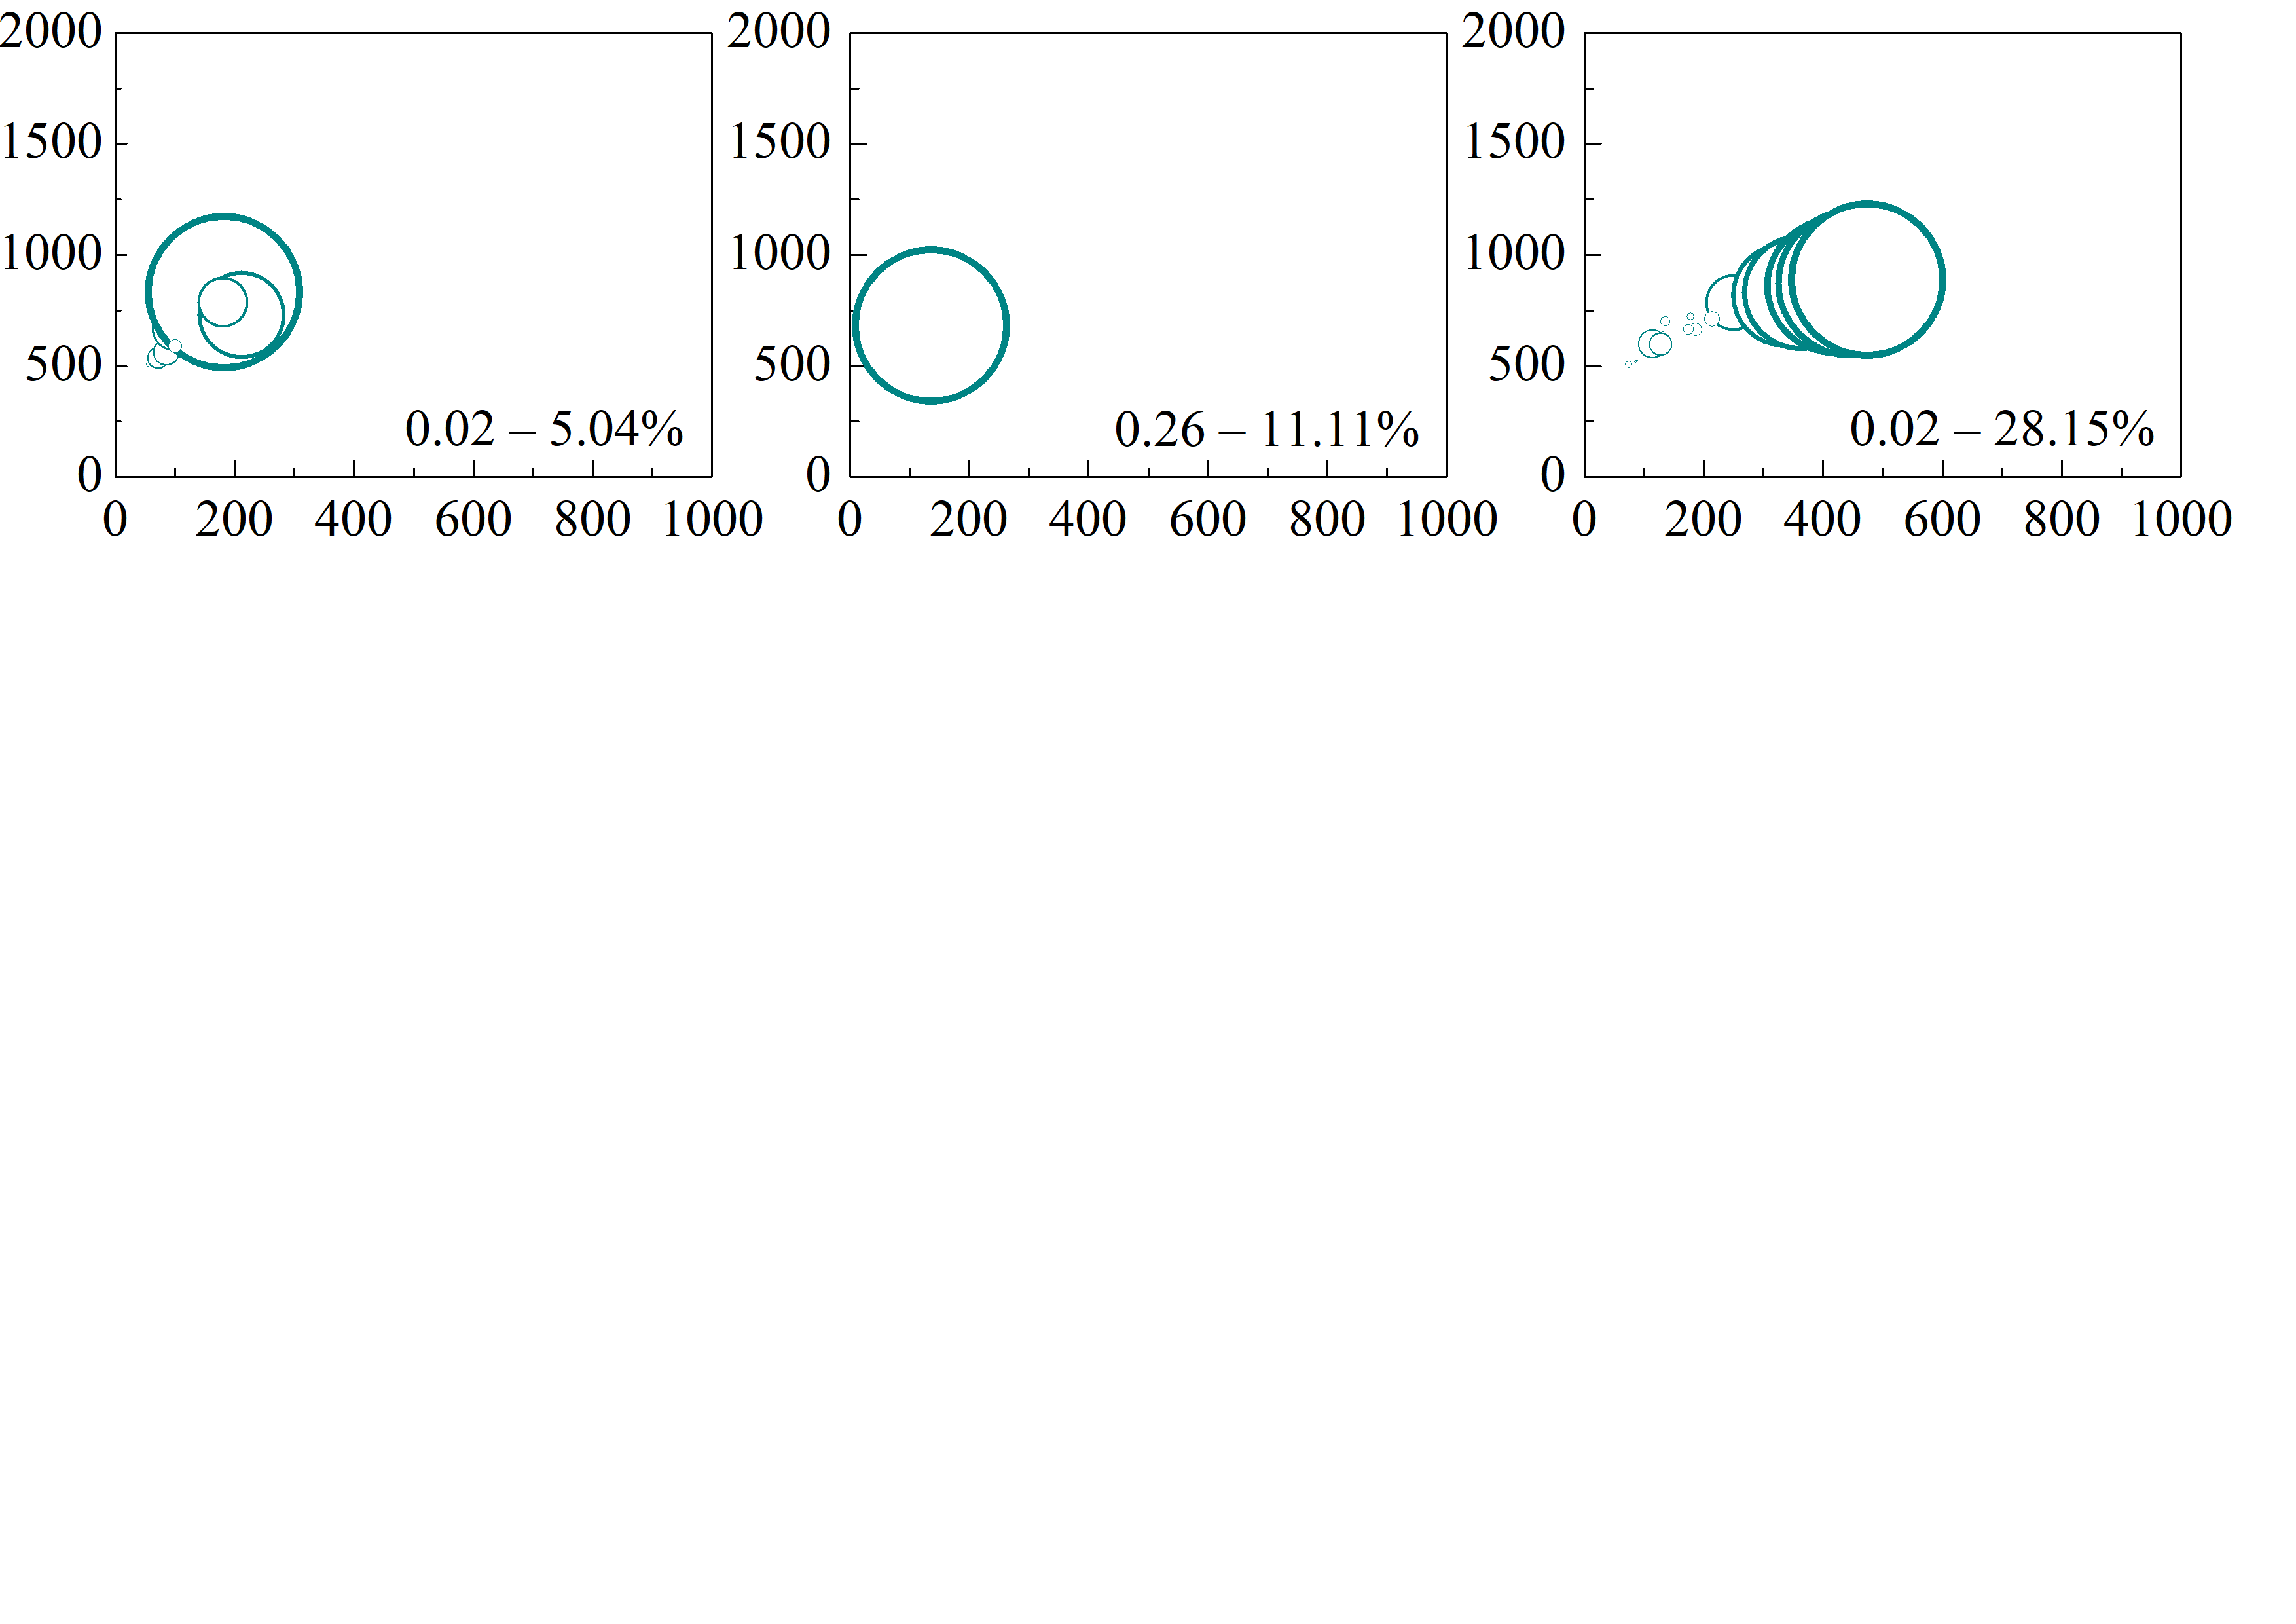* | | | | | | |
|  | *Molecular weight, g/mol* | | | | | | |

*ARD* values are shown as a function of *MM* and *Tc* for different families where the magnitude of *ARD* is indicated by the size of the symbol “O”. Compounds with the highest deviations: hexacontane; 1-octadecene; 3-methyl-1-butyne; 1,3,5-trimethyltricyclo[3.3.1.1(3,7)]decane; m-terphenyl; 1-docosanol; m-cresol; stearic acid; benzaldehyde; benzophenone; 1-methoxy-2,4-dimethylbenzene; diundecyl-1,2-benzenedicarboxylate.

**Figure S4 (continuation).**

| *Experimental critical temperature Tc, K* | *a) Nitrogen* | *b) Multifunctional oxygen* | | | *c) Chlorine* | | |
| --- | --- | --- | --- | --- | --- | --- | --- |
| *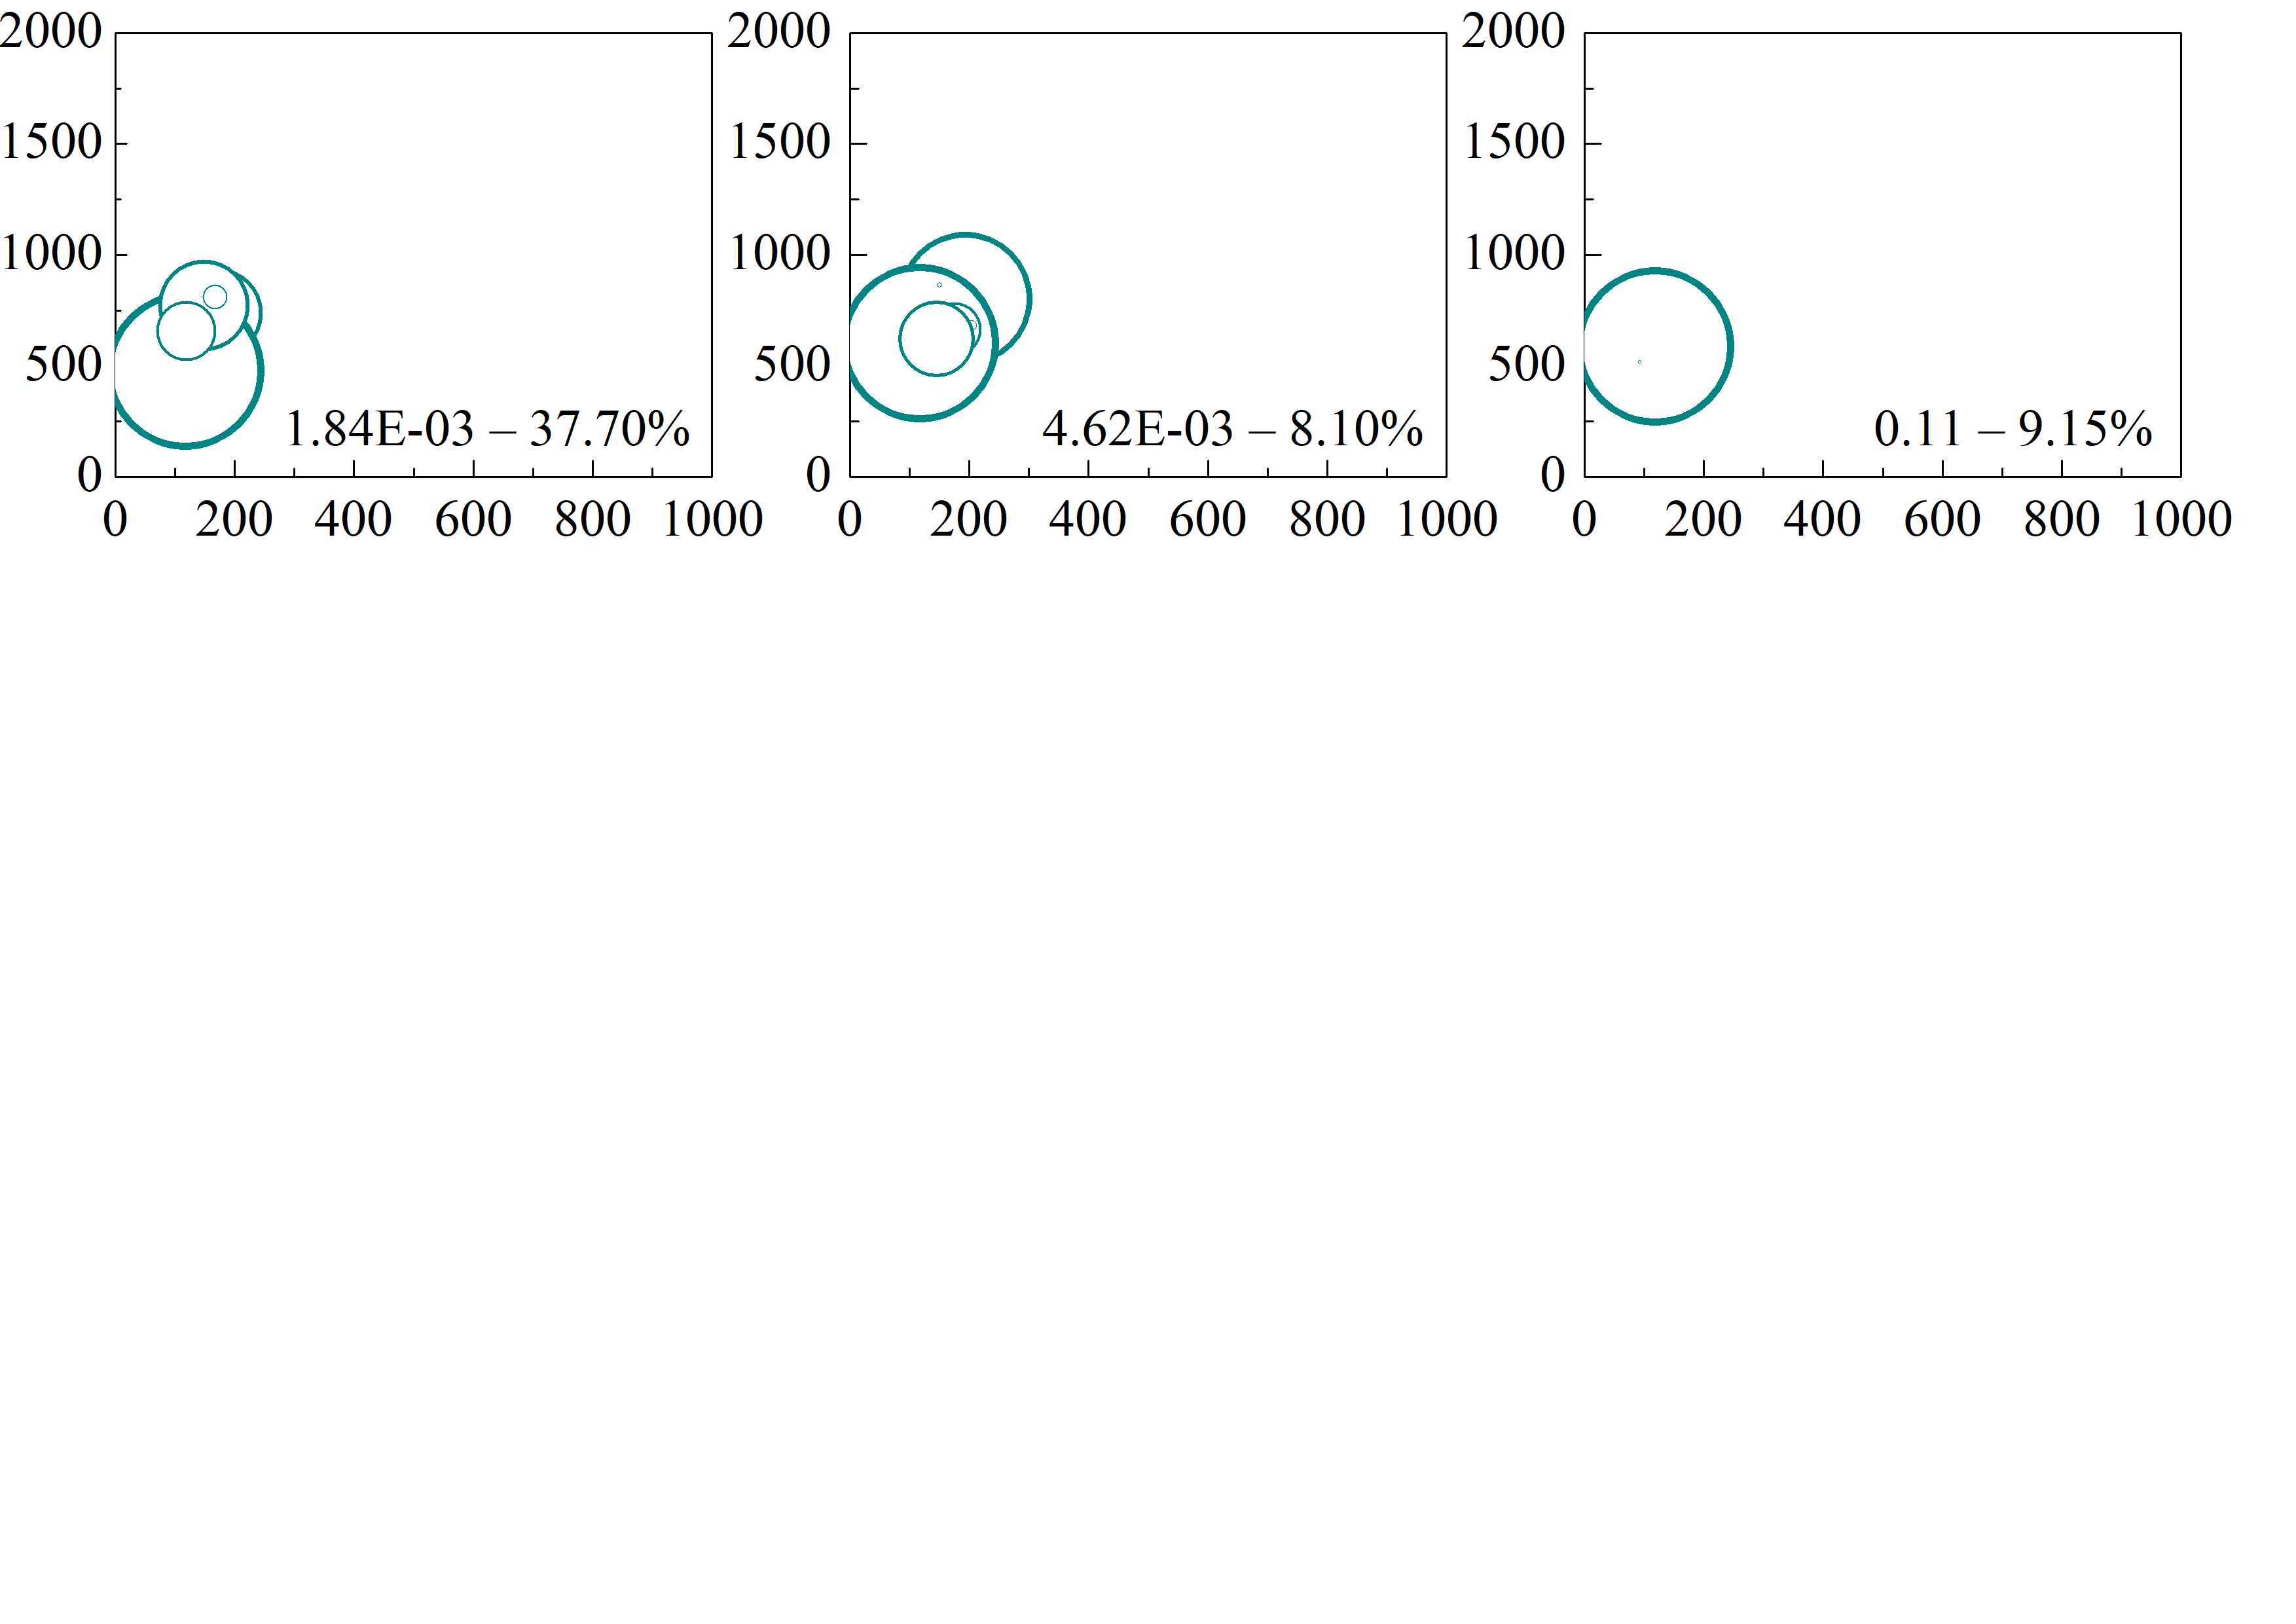* | | | | | | | |
| *d) Fluorine* | *e) Bromine* | | | | *f) Iodine* | | |
| *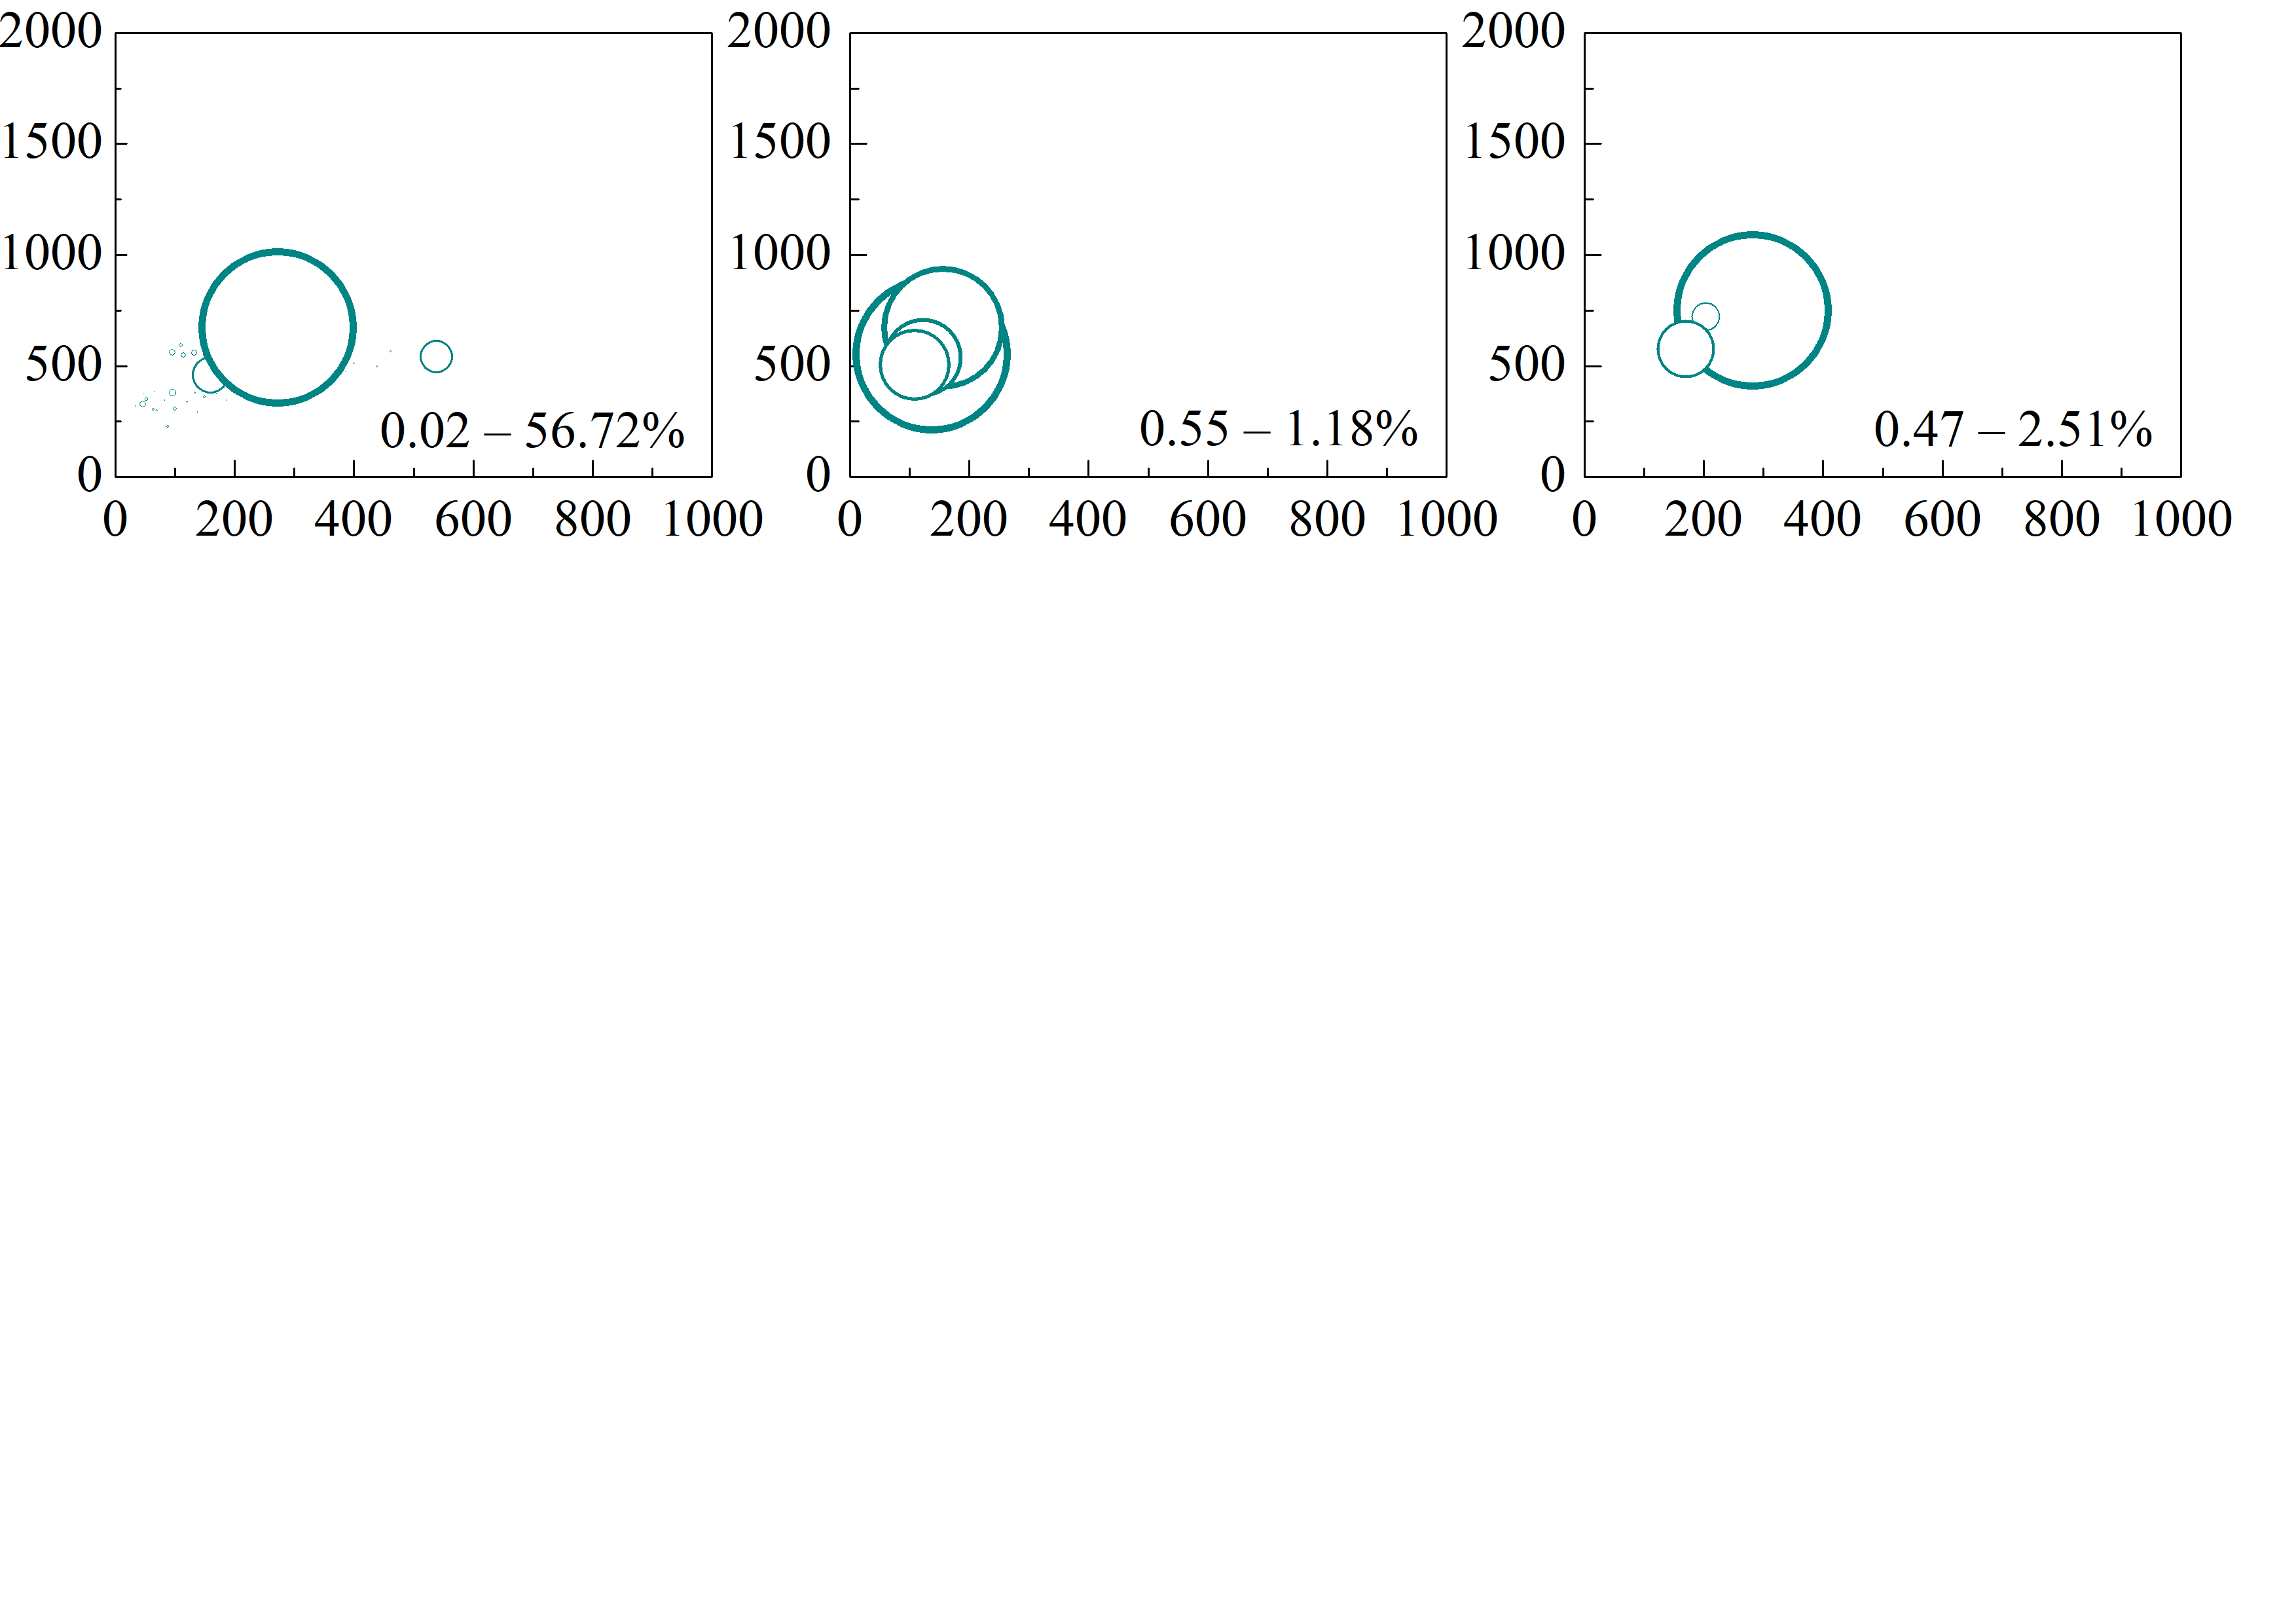* | | | | | | | |
| *g) Other halogenated* | *h) Sulfur* | | *i) Silicon* | | |
| *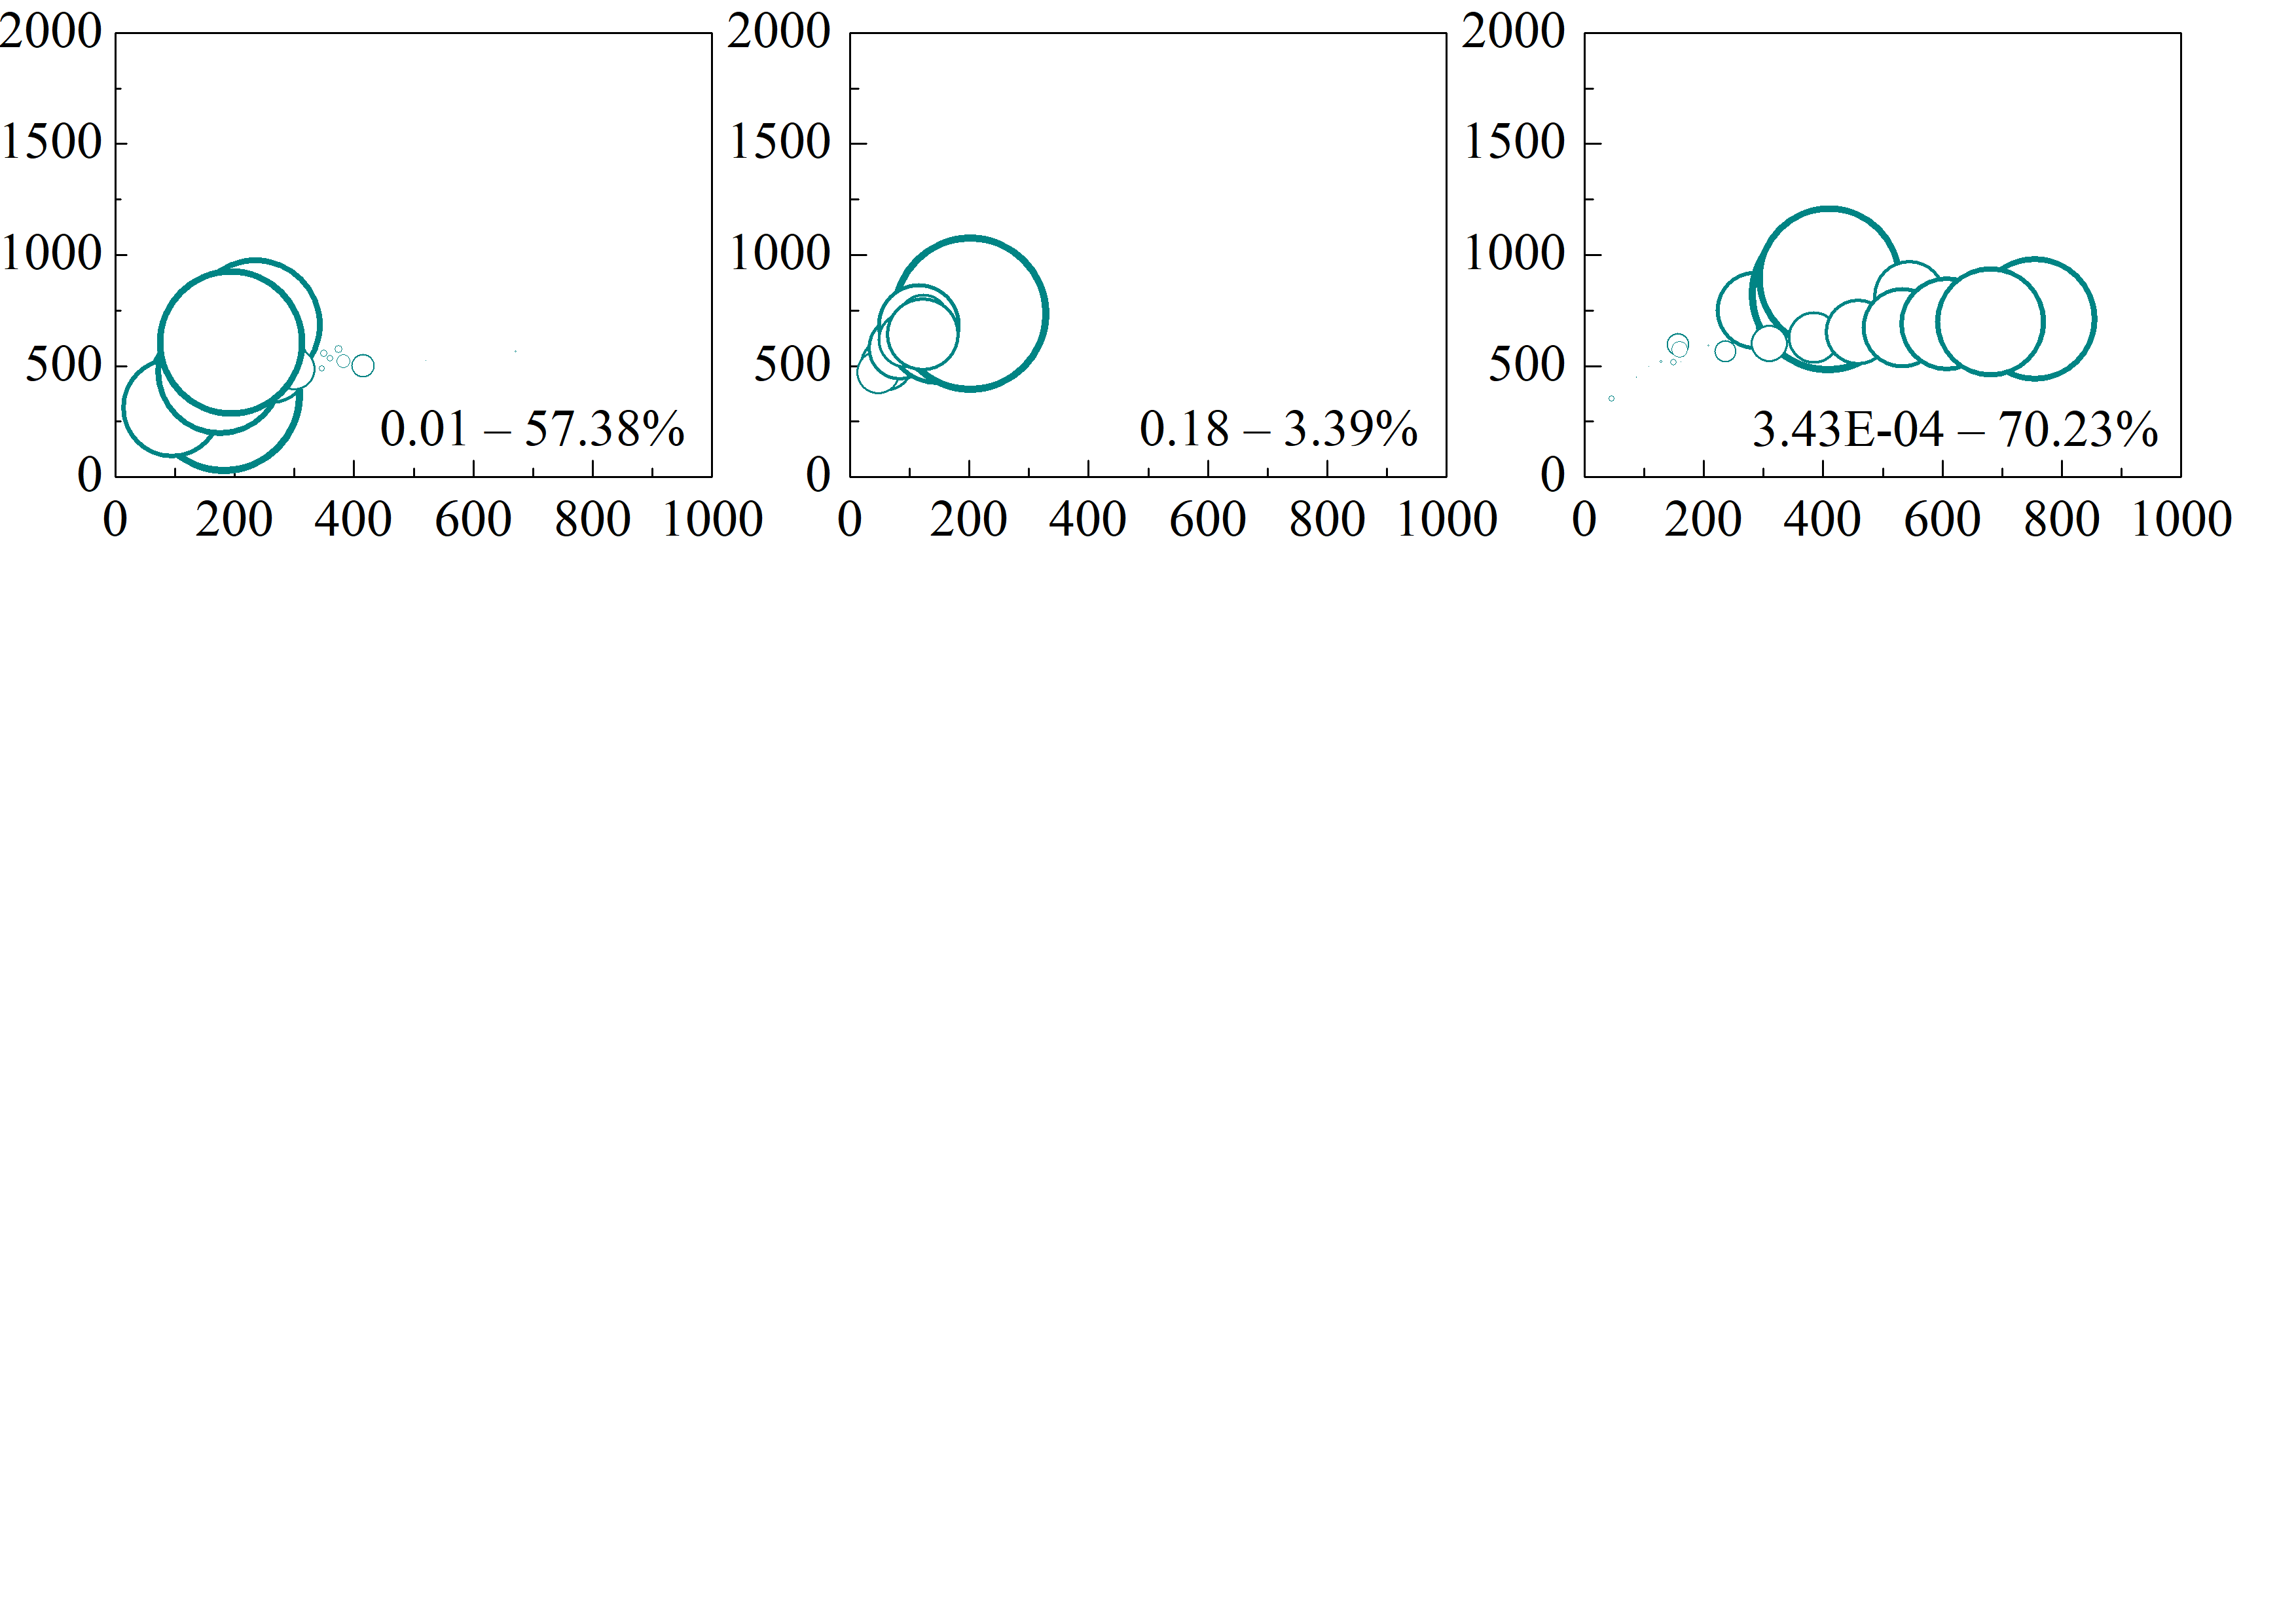* | | | | | | | |
|  | *j) Iron* | | *k) Titanium* | | | | | |
|  | *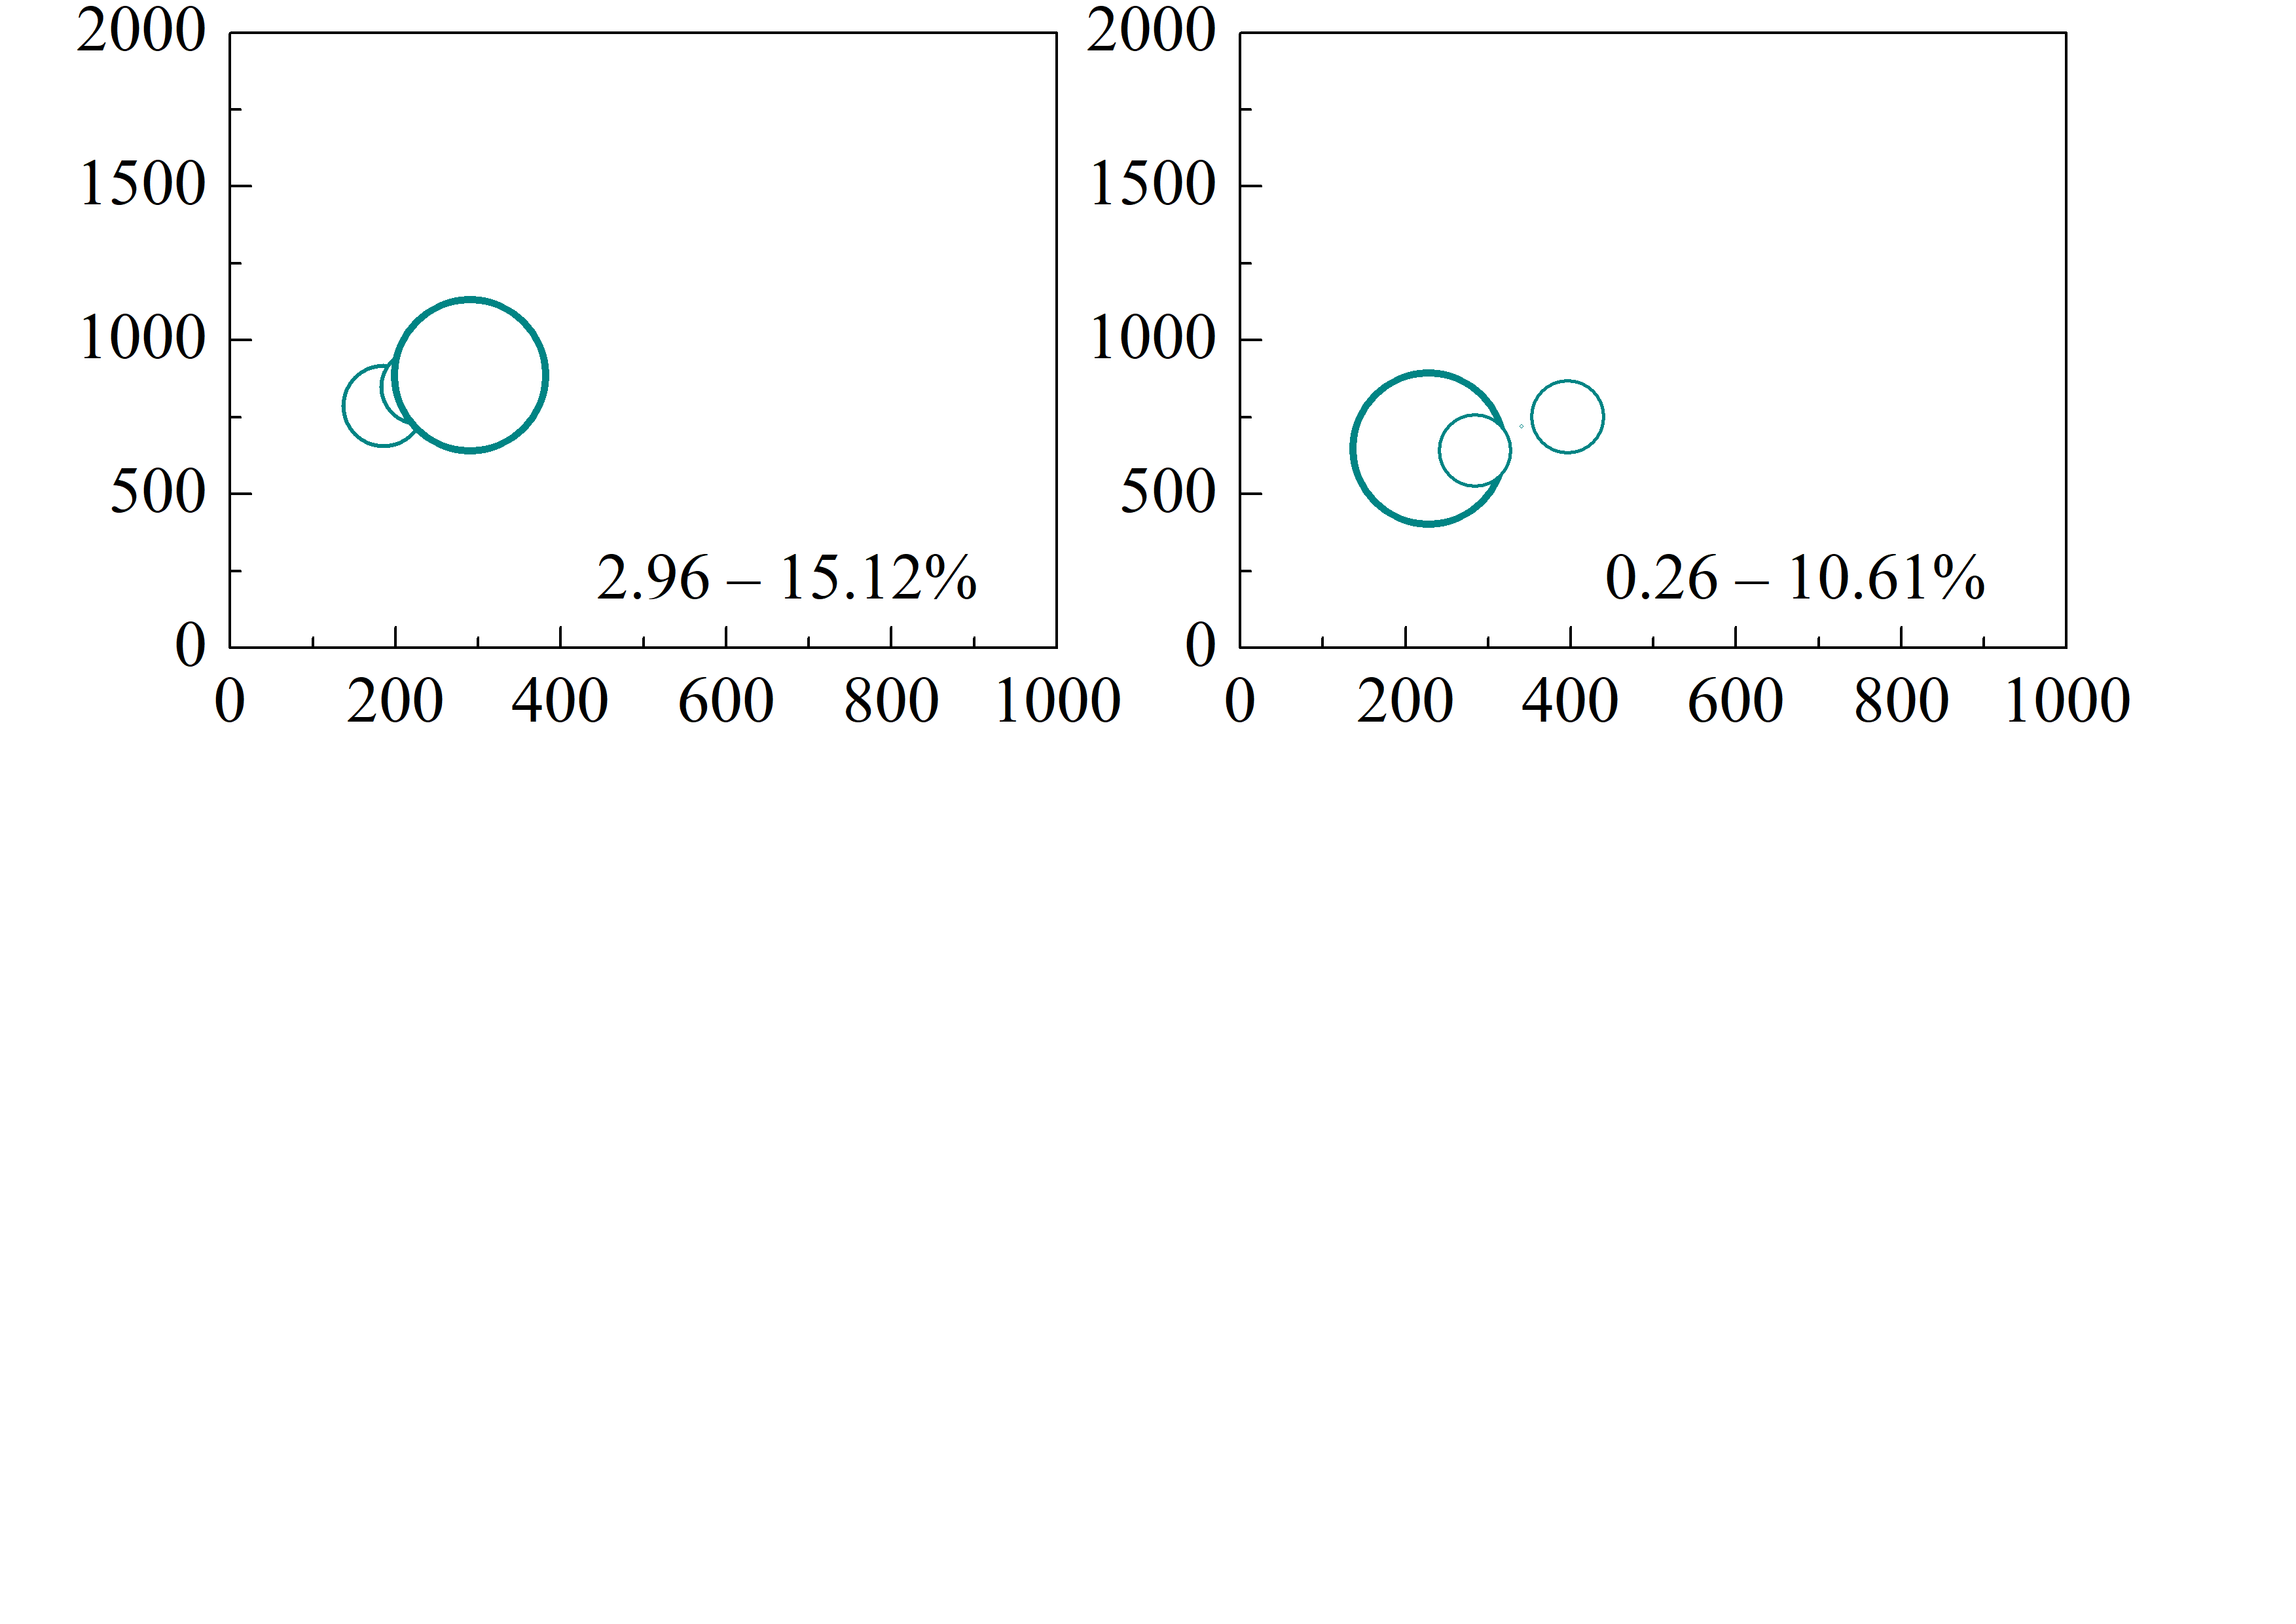* | | | | | | | |
|  | *Molecular weight, g/mol* | | | | | | | |

Compounds with the highest deviations: 3-methyl-1-nitrosooxybutane; 2-methoxyethyl ethanoate; chlorocyclohexane; octafluoronaphthalene; 2-bromobutane; 1,2-diiodoethane; hexafluoro-1,3-dioxolane; 1-dodecanethiol; (2r,4r,6r)-2,4,6-trimethyl-2,4,6-triphenylcyclotrisiloxane; benzoylferrocene; tetraethoxytitanium.

**Figure S5.** *ARD* for the calculation of critical pressure with *MPC4* model. The diameter of symbol “O” is directly associated with *ARD* magnitude.

| *Experimental critical pressure Pc, bar* | *a) Alkane* | *b) Alkene* | *c) Alkyne* | |
| --- | --- | --- | --- | --- |
| *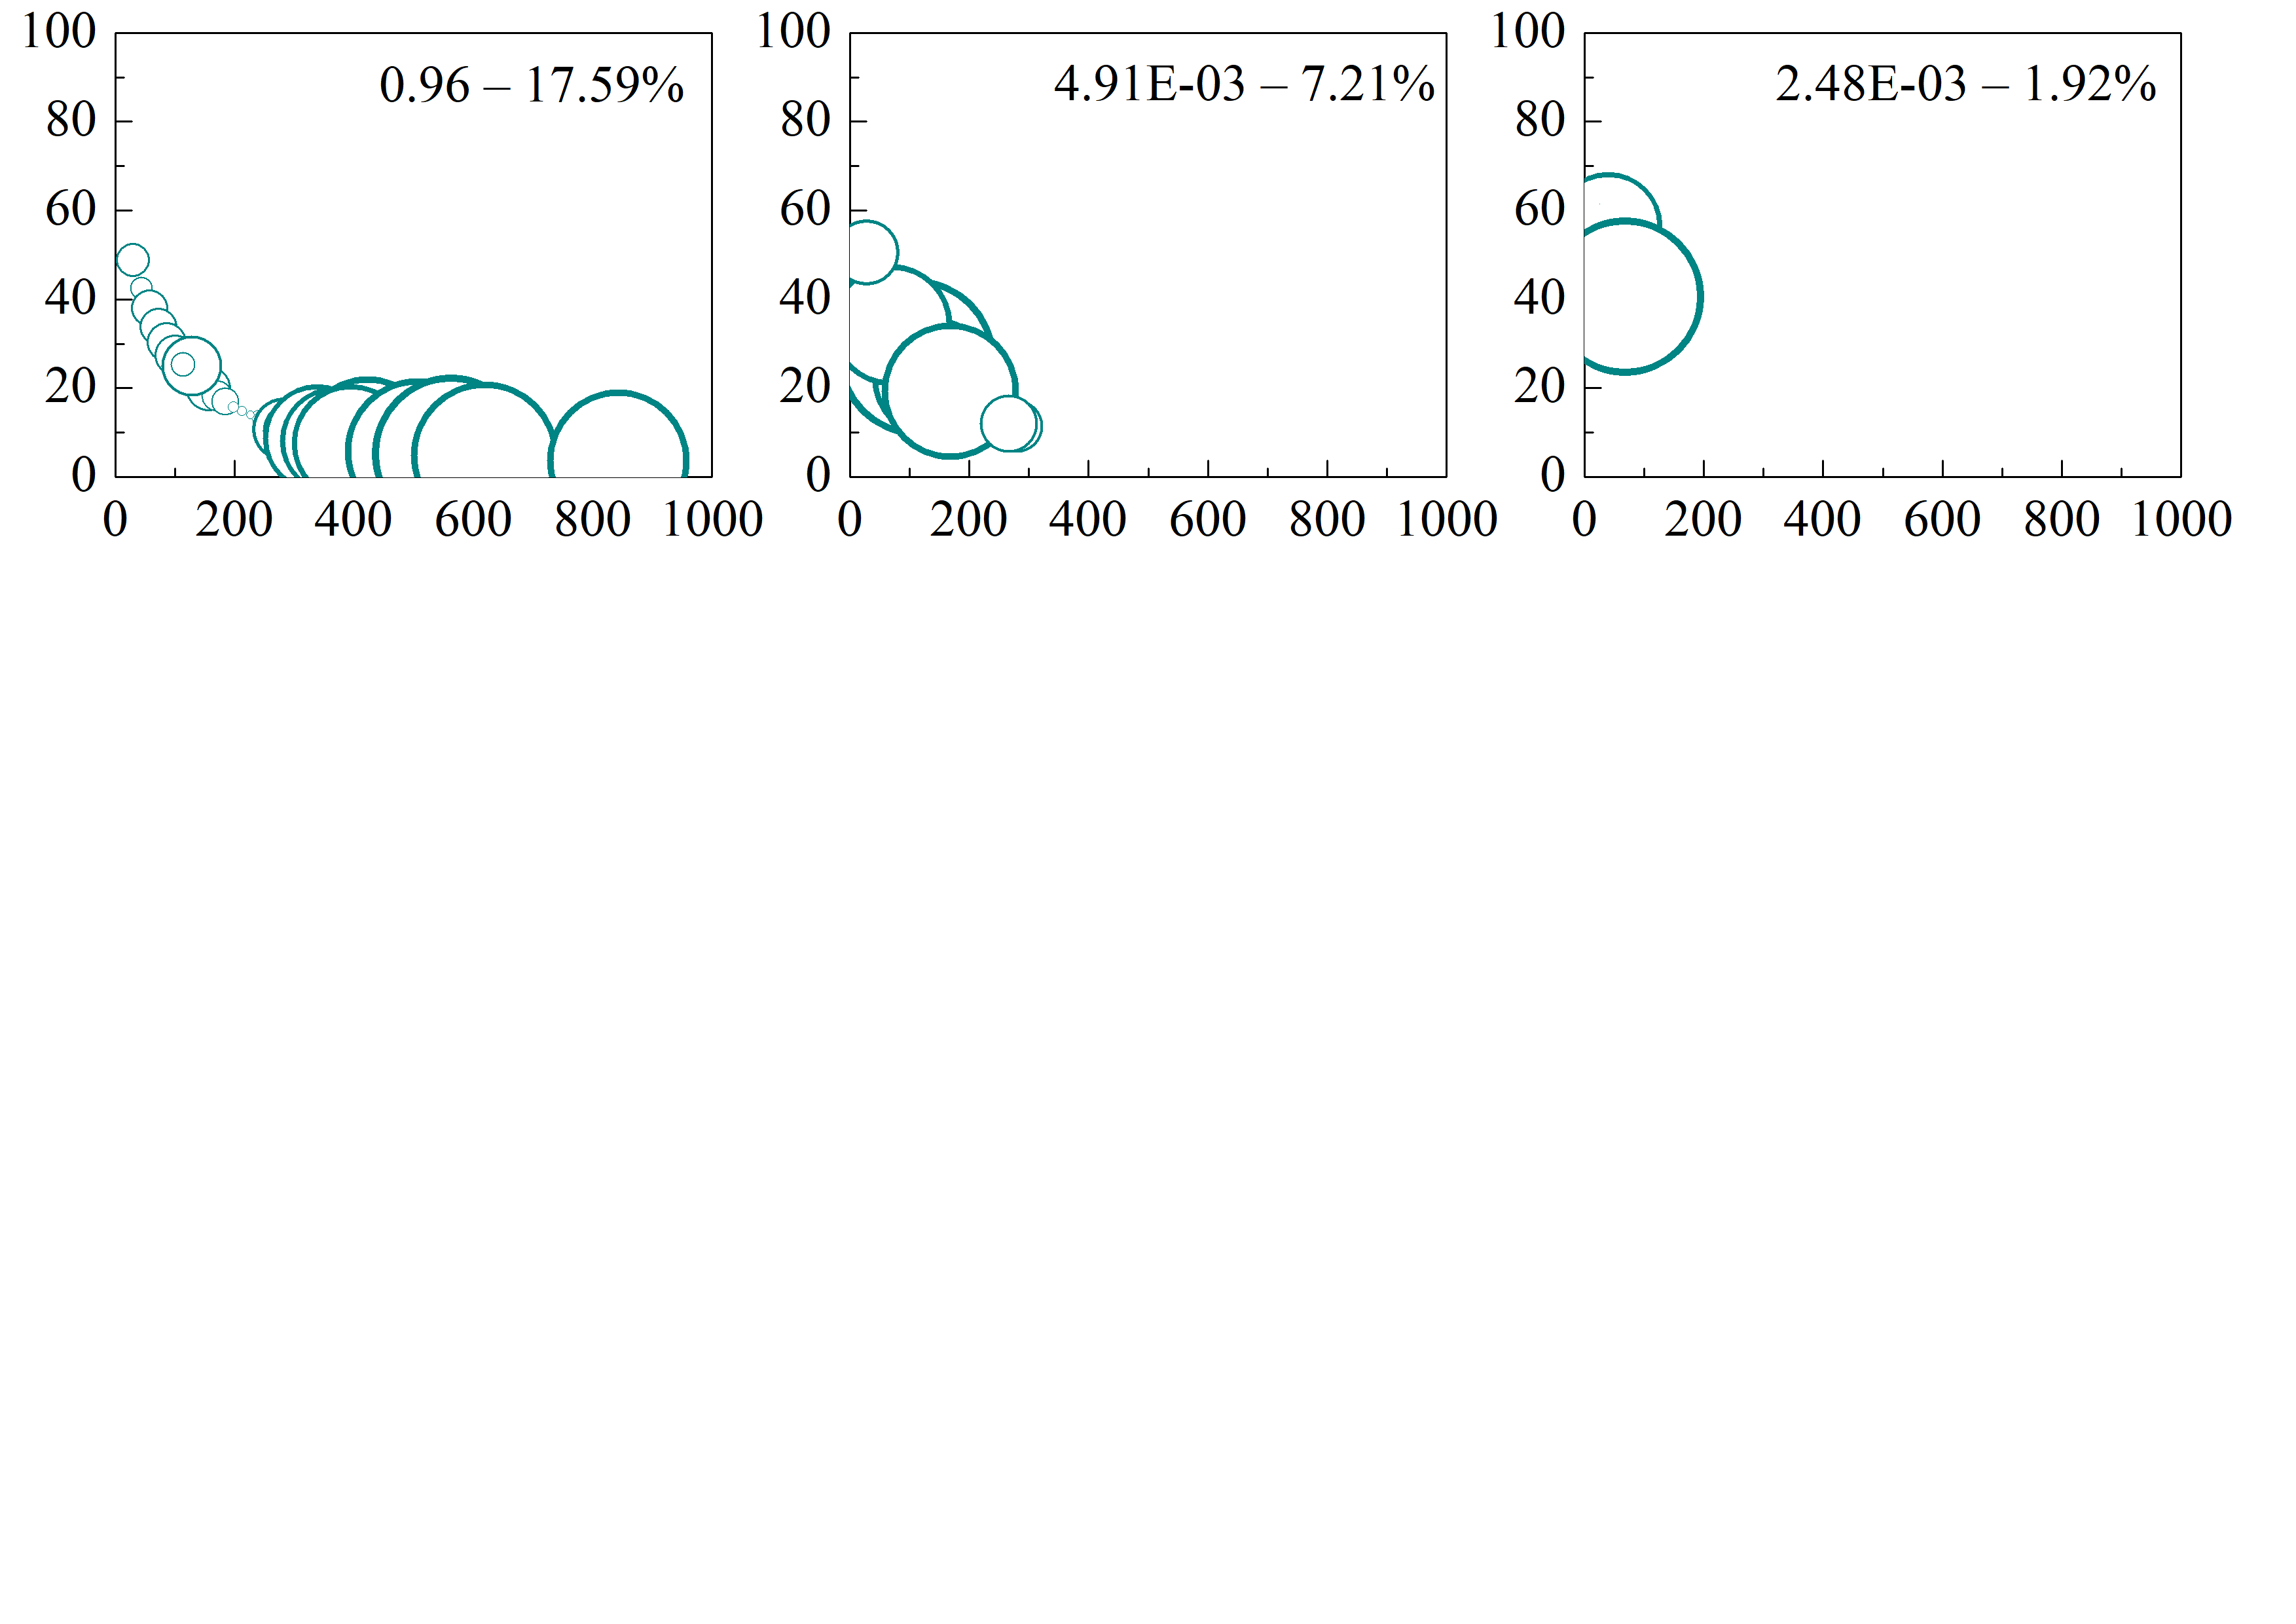* | | | | | |
| *d) Cyclic hydrocarbon* | *e) Aromatic hydrocarbon* | | *f) Alcohol* | |
| *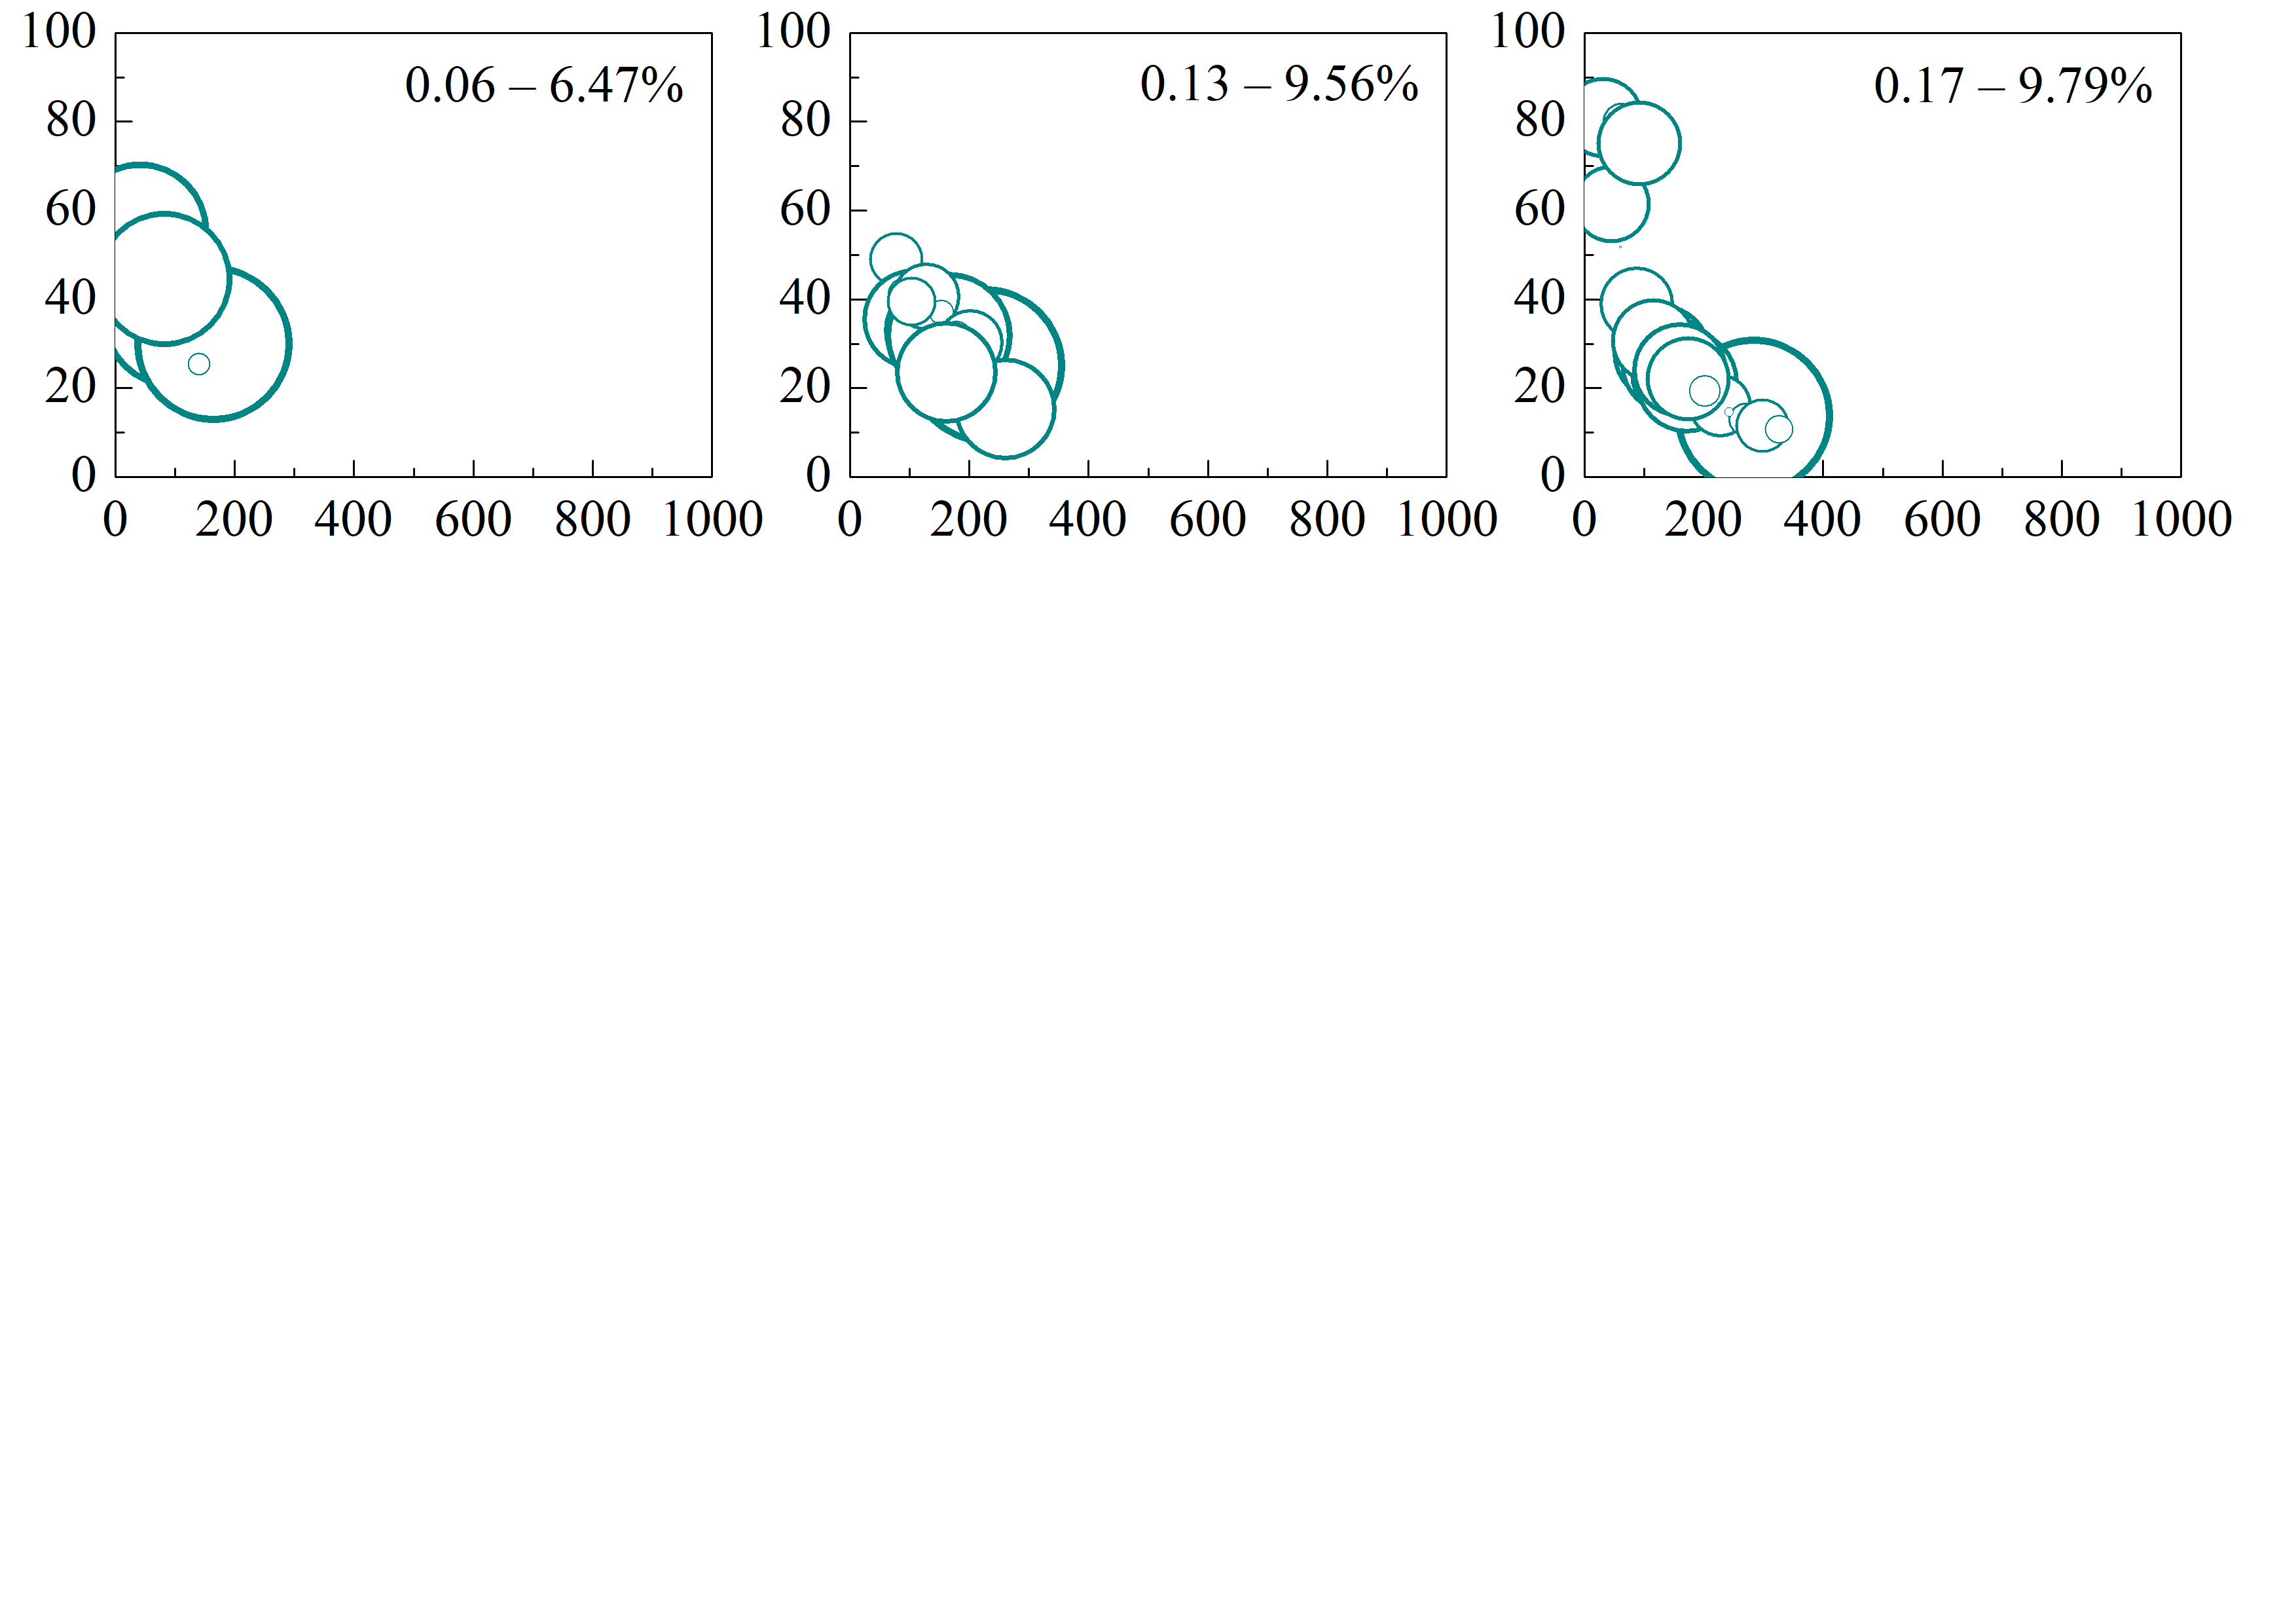* | | | | | |
| *g) Phenol* | *h) Carboxylic acid* | *i) Aldehyde* | |
| *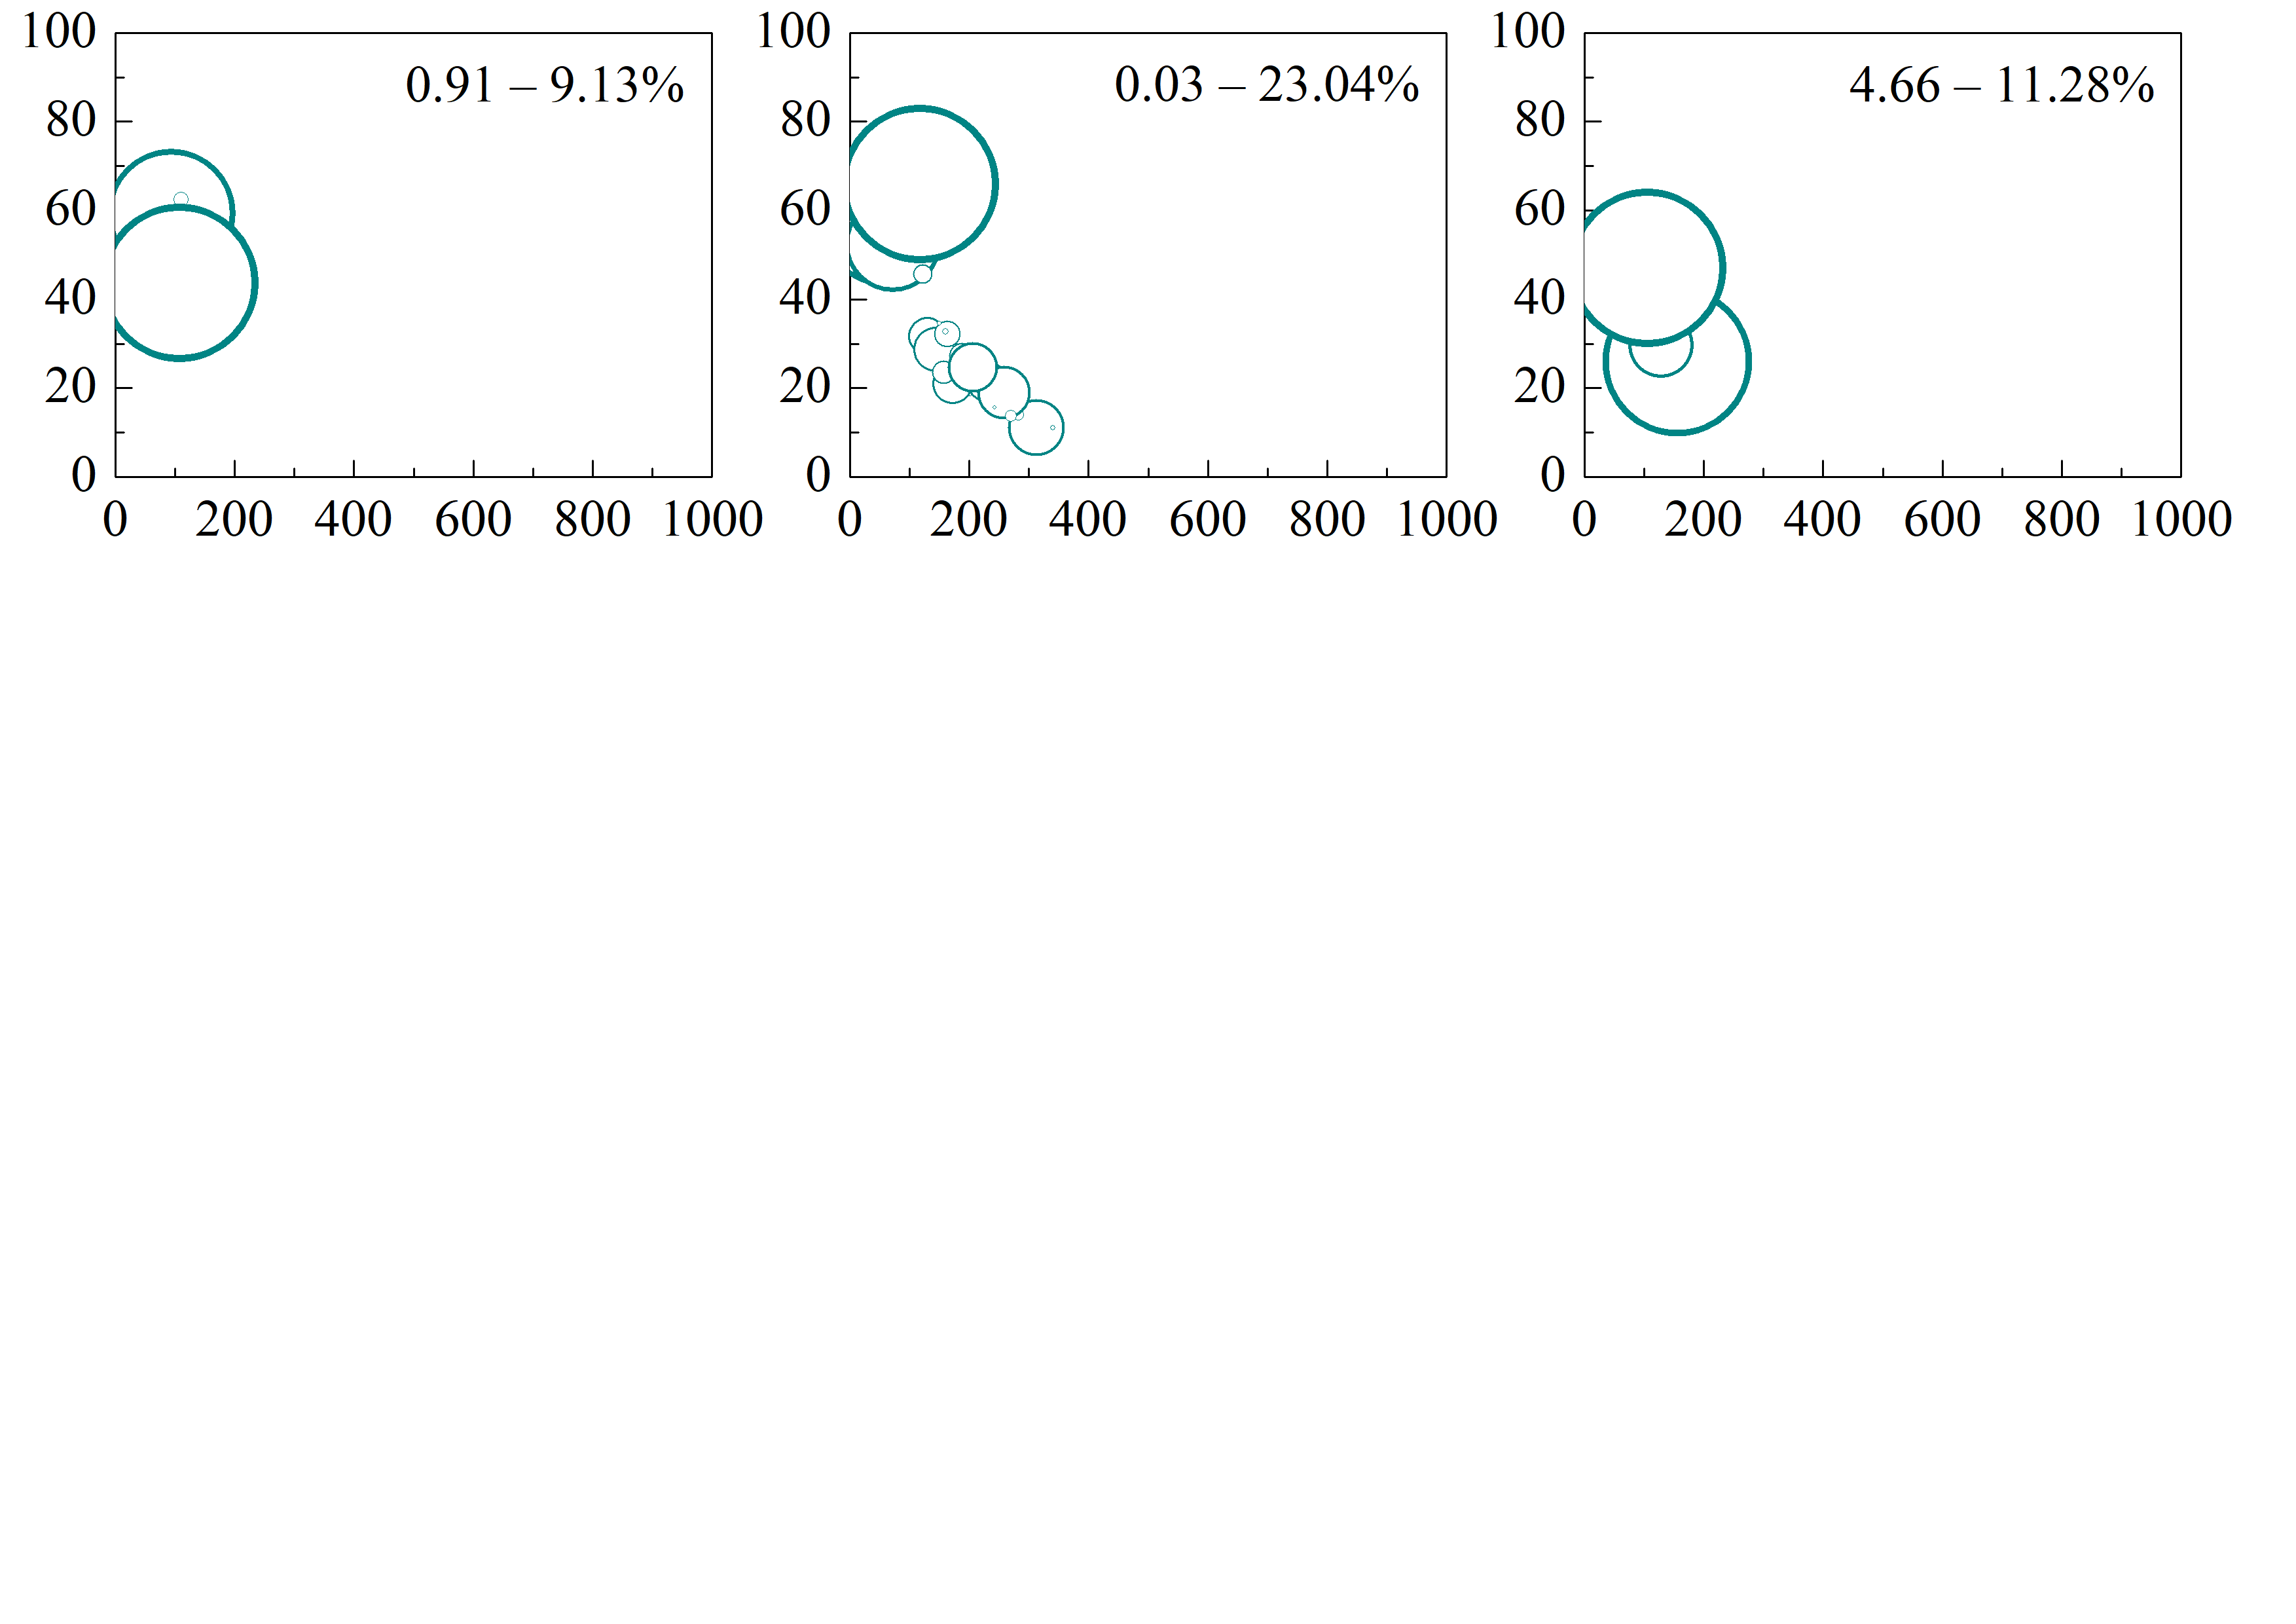* | | | | | |
| *j) Ketone* | *k) Ether* | *l) Ester* | |
| *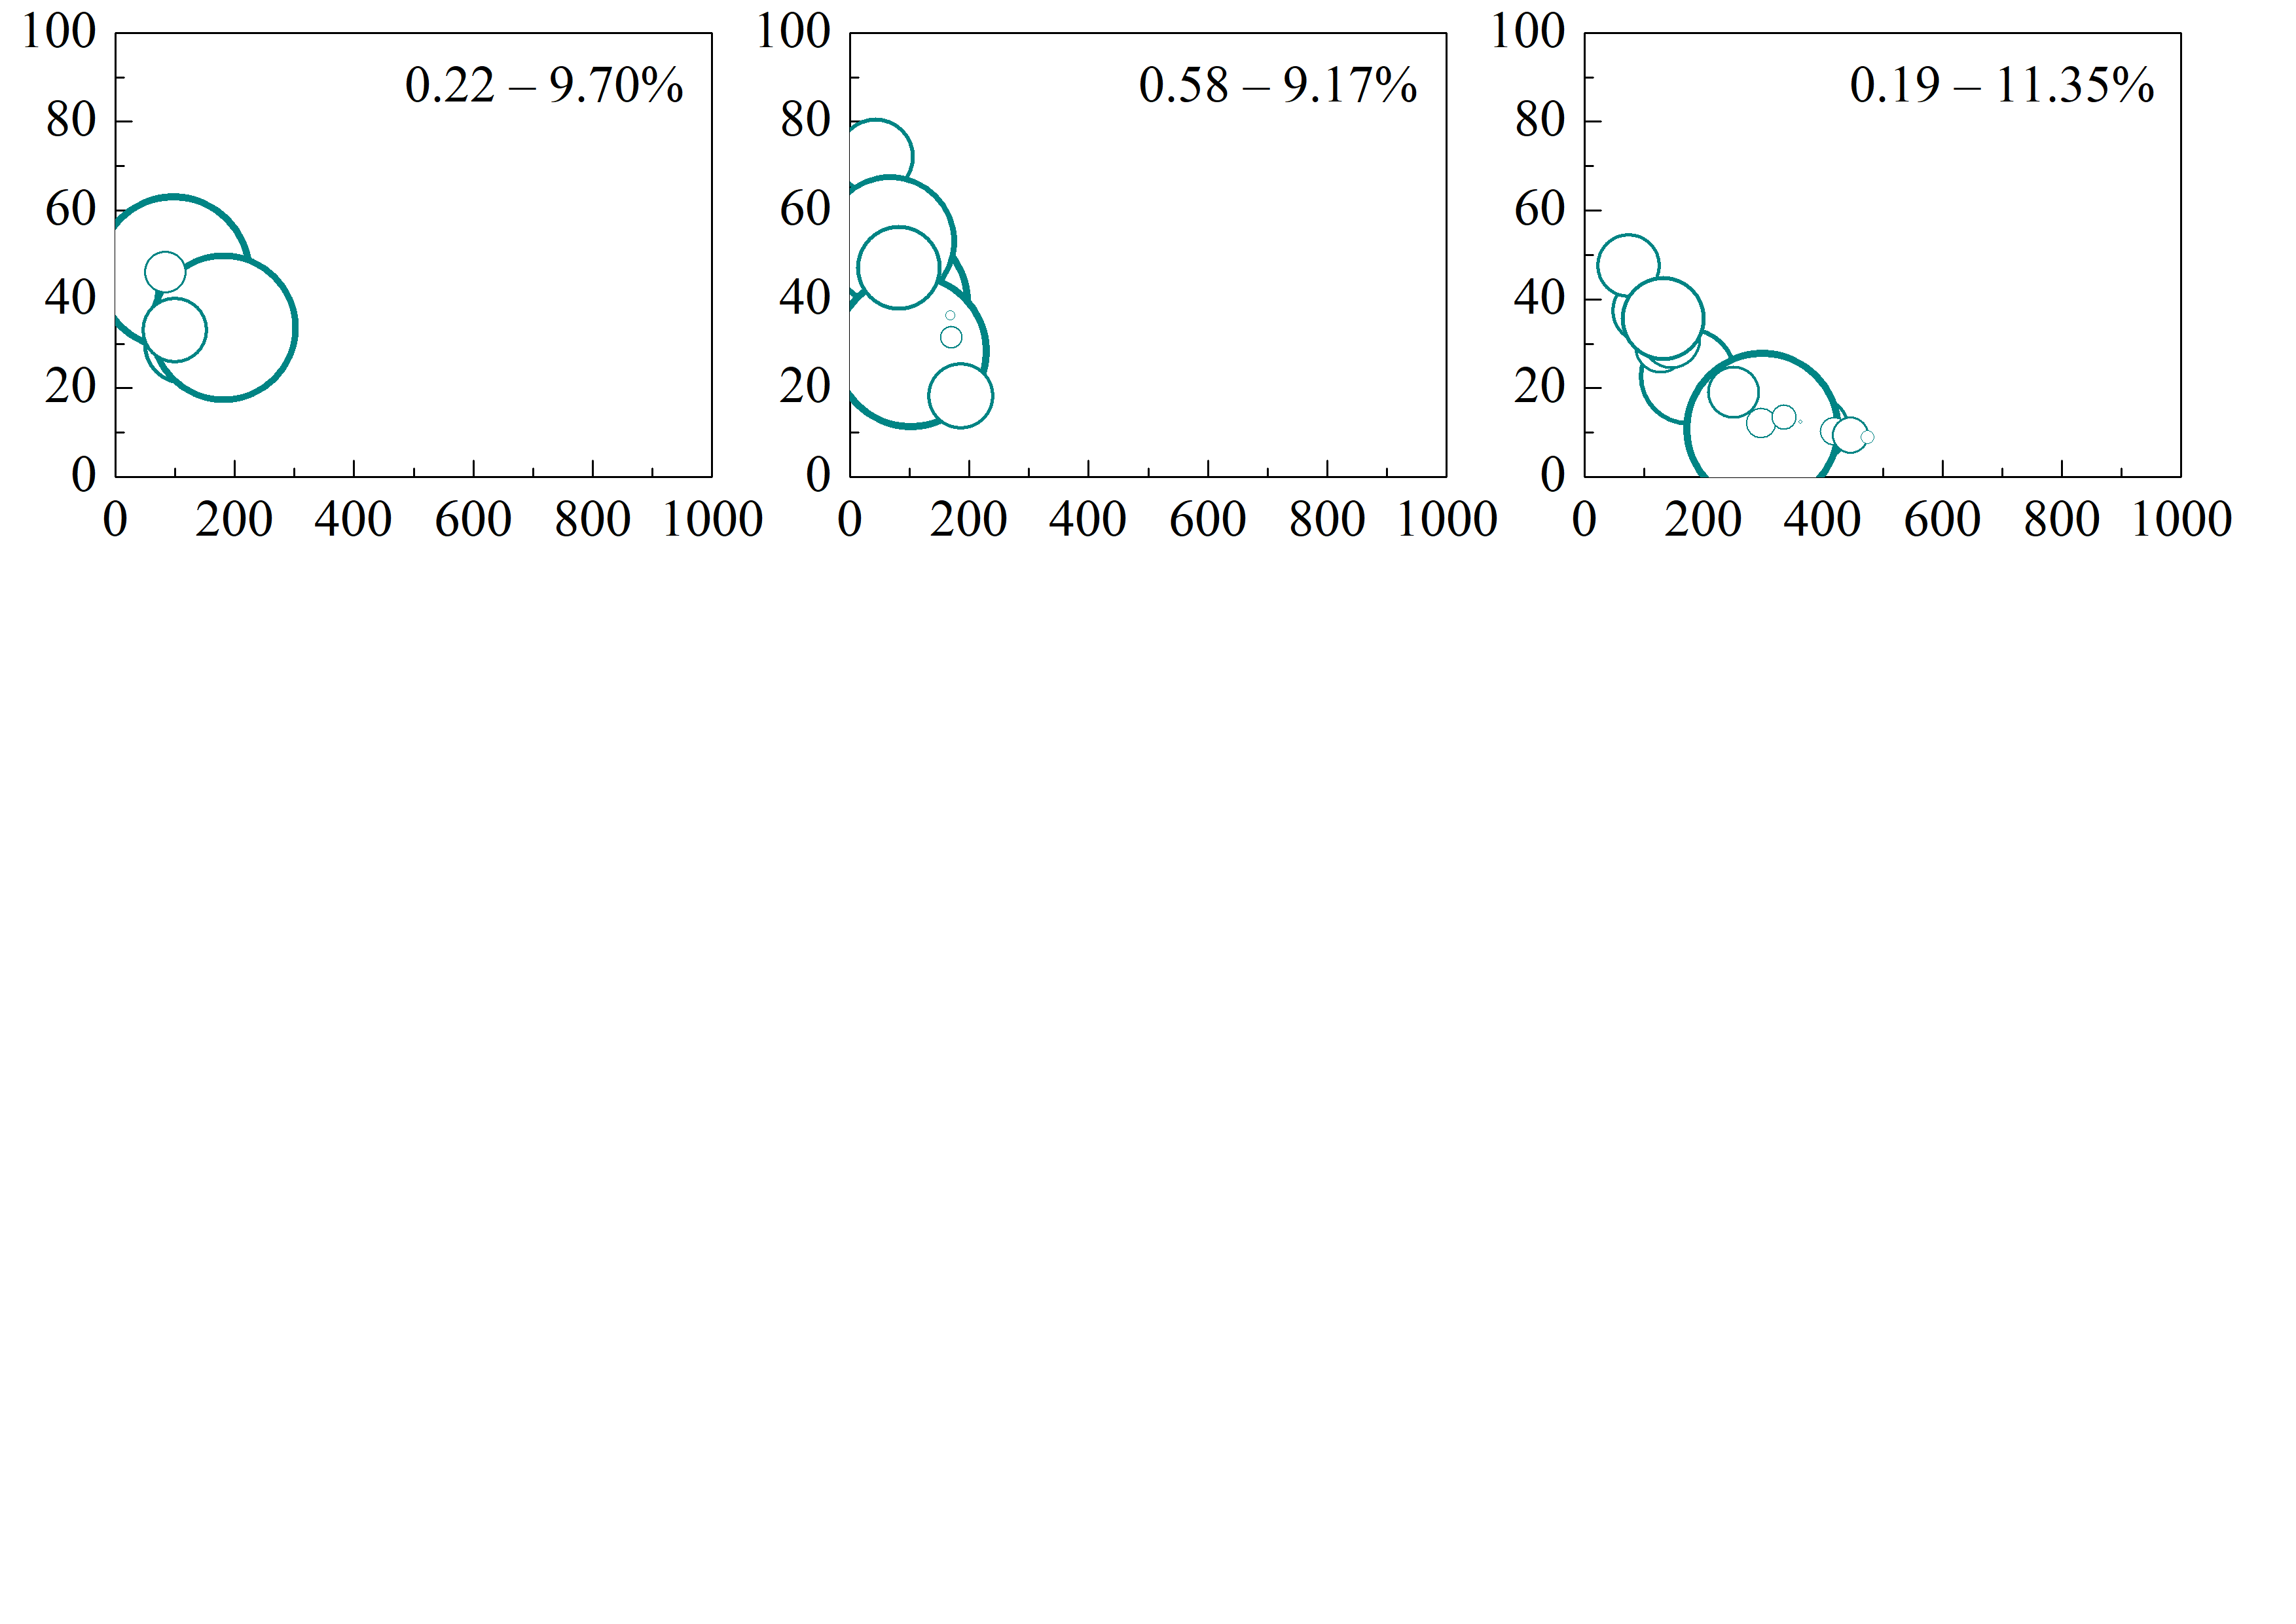* | | | | | |
|  | *Molecular weight, g/mol* | | | | | |

*ARD* values are shown as a function of *MM* and *Pc* for different families where the magnitude of *ARD* is indicated by the size of the symbol “O”. Compounds with the highest deviations: tetracontane; 1-octene; 3-methyl-1-butyne; 1,3-dimethyltricyclo[3.3.1.1(3,7)]decane; triphenylene; 1-nonadecanol; m-cresol; butanedioic acid; benzaldehyde; cyclohexanone; diisopropyl ether; methyl octadecanoate.

**Figure S5 (continuation).**

| *Experimental critical pressure Pc, bar* | *a) Nitrogen* | *b) Multifunctional oxygen* | | | *c) Chlorine* | | |
| --- | --- | --- | --- | --- | --- | --- | --- |
| *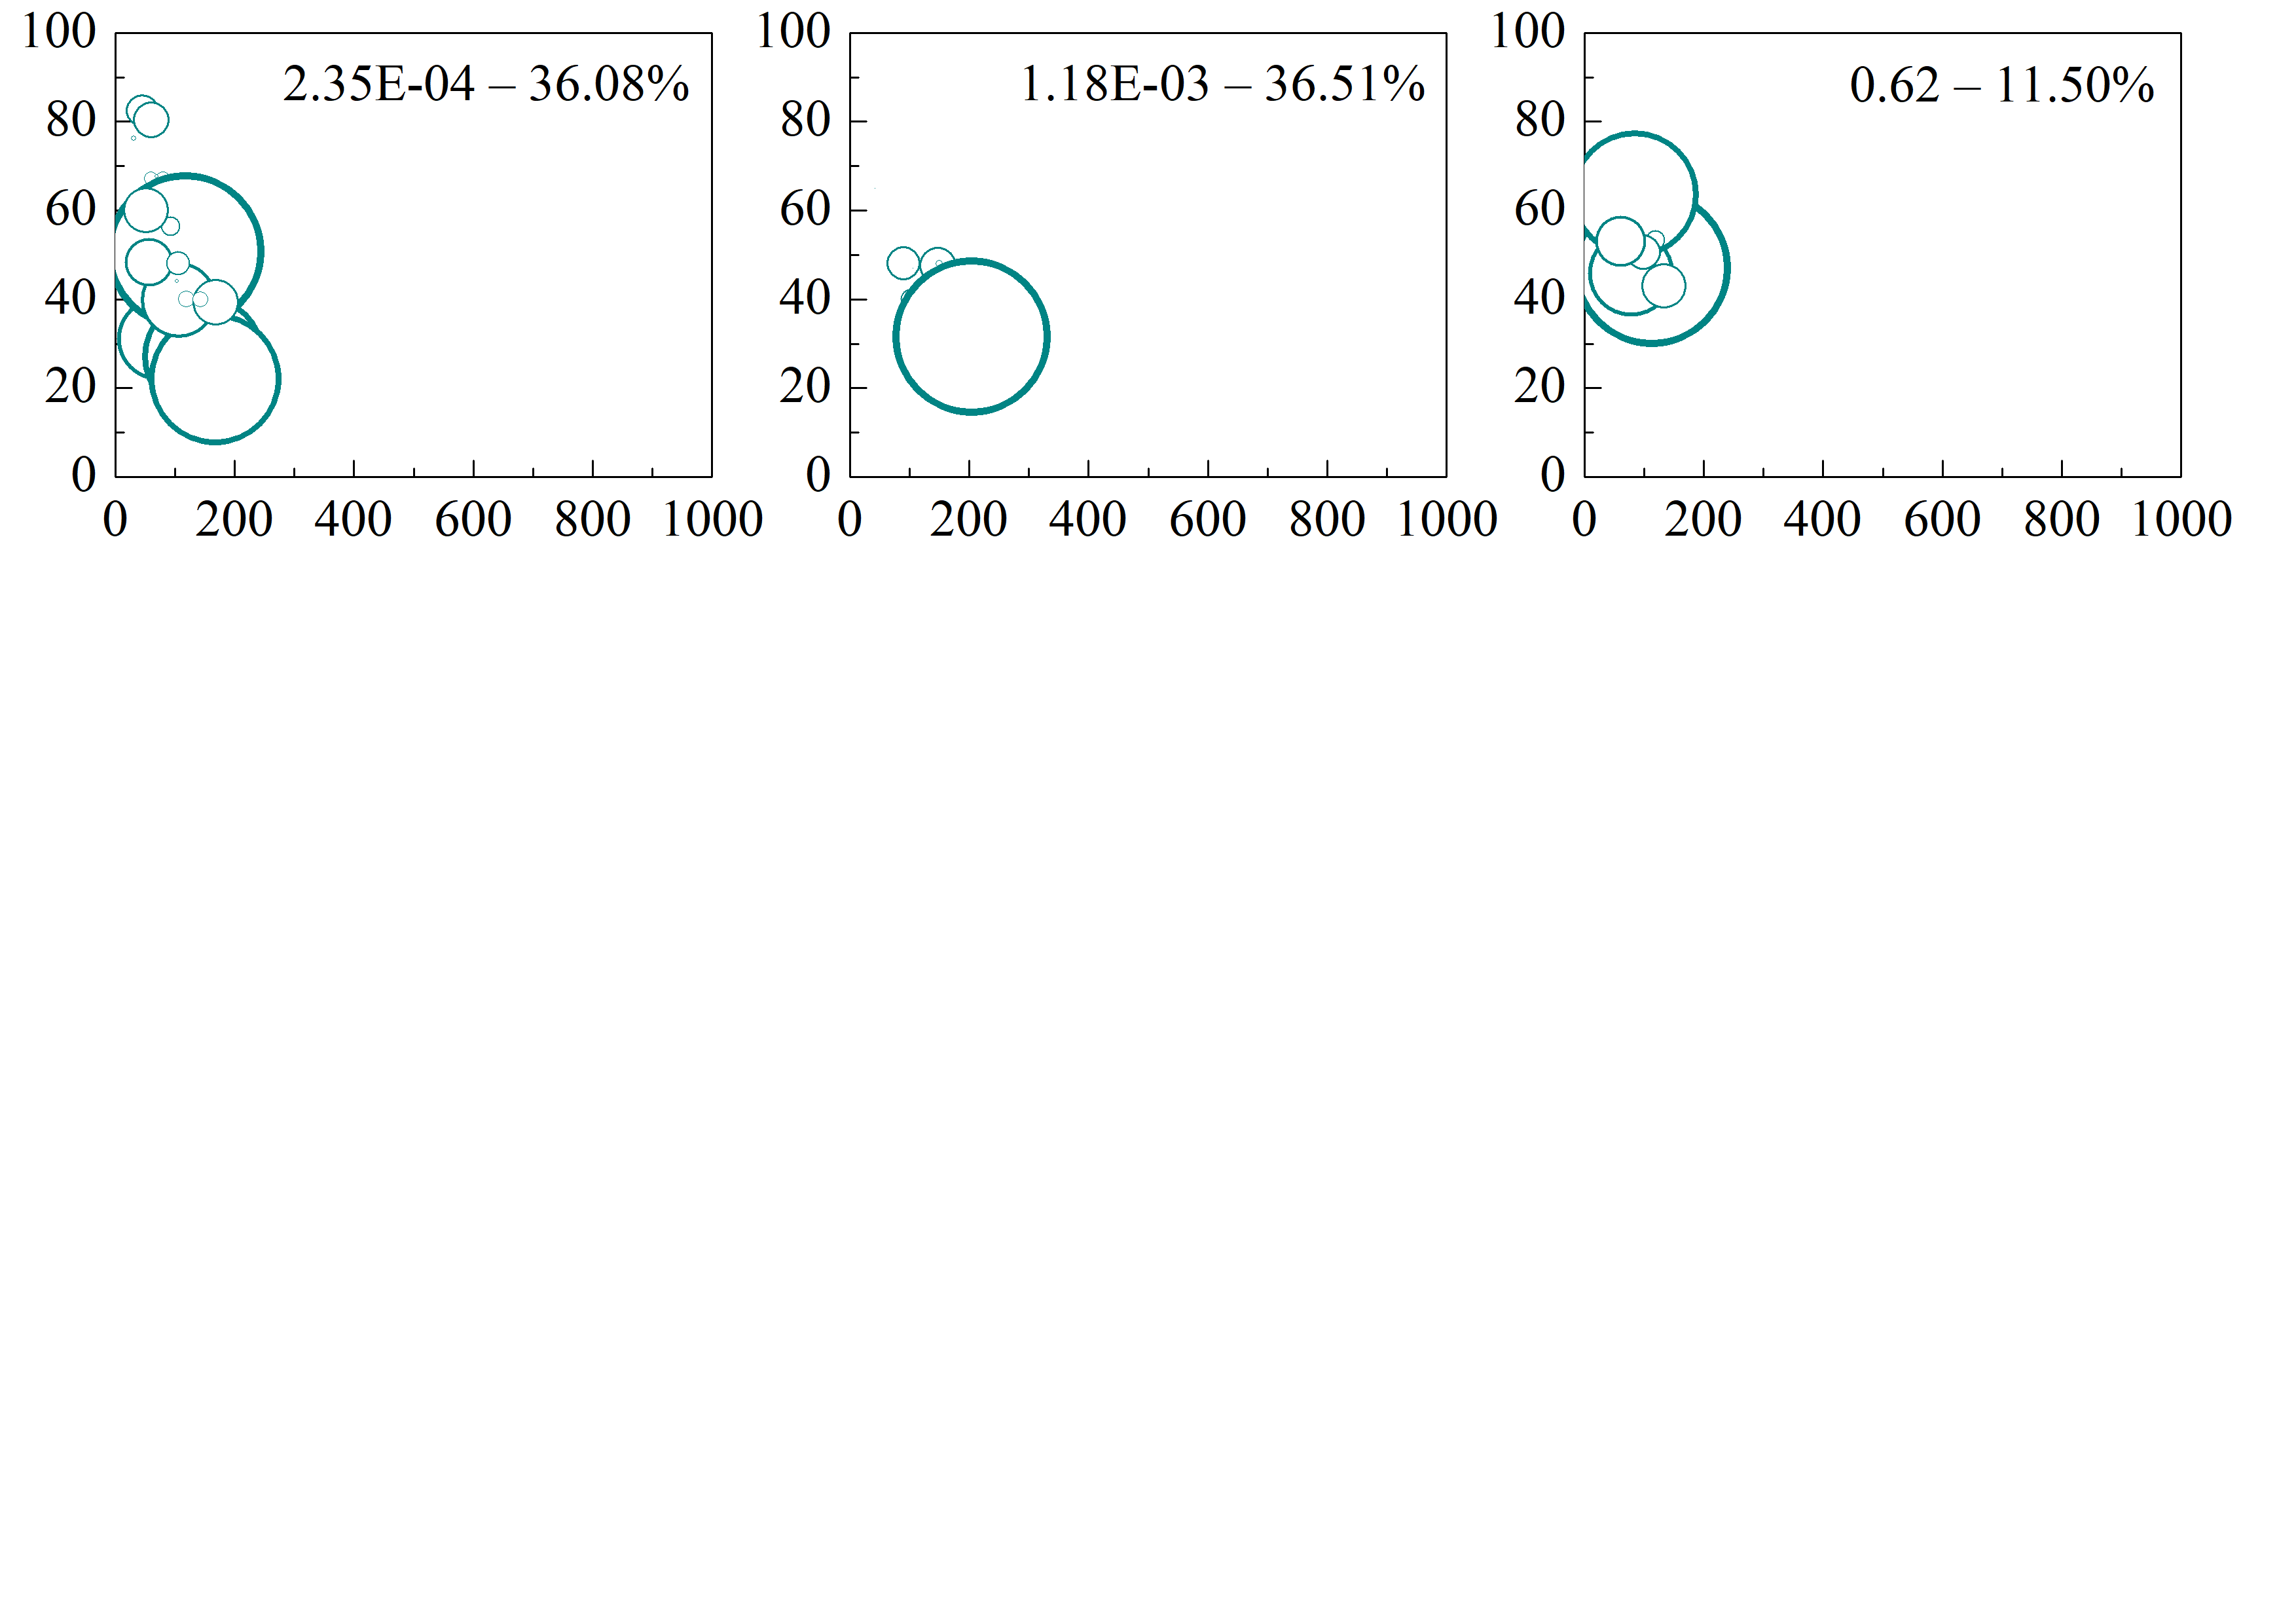* | | | | | | | | |
| *d) Fluorine* | | *e) Bromine* | | | | *f) Iodine* | | |
| *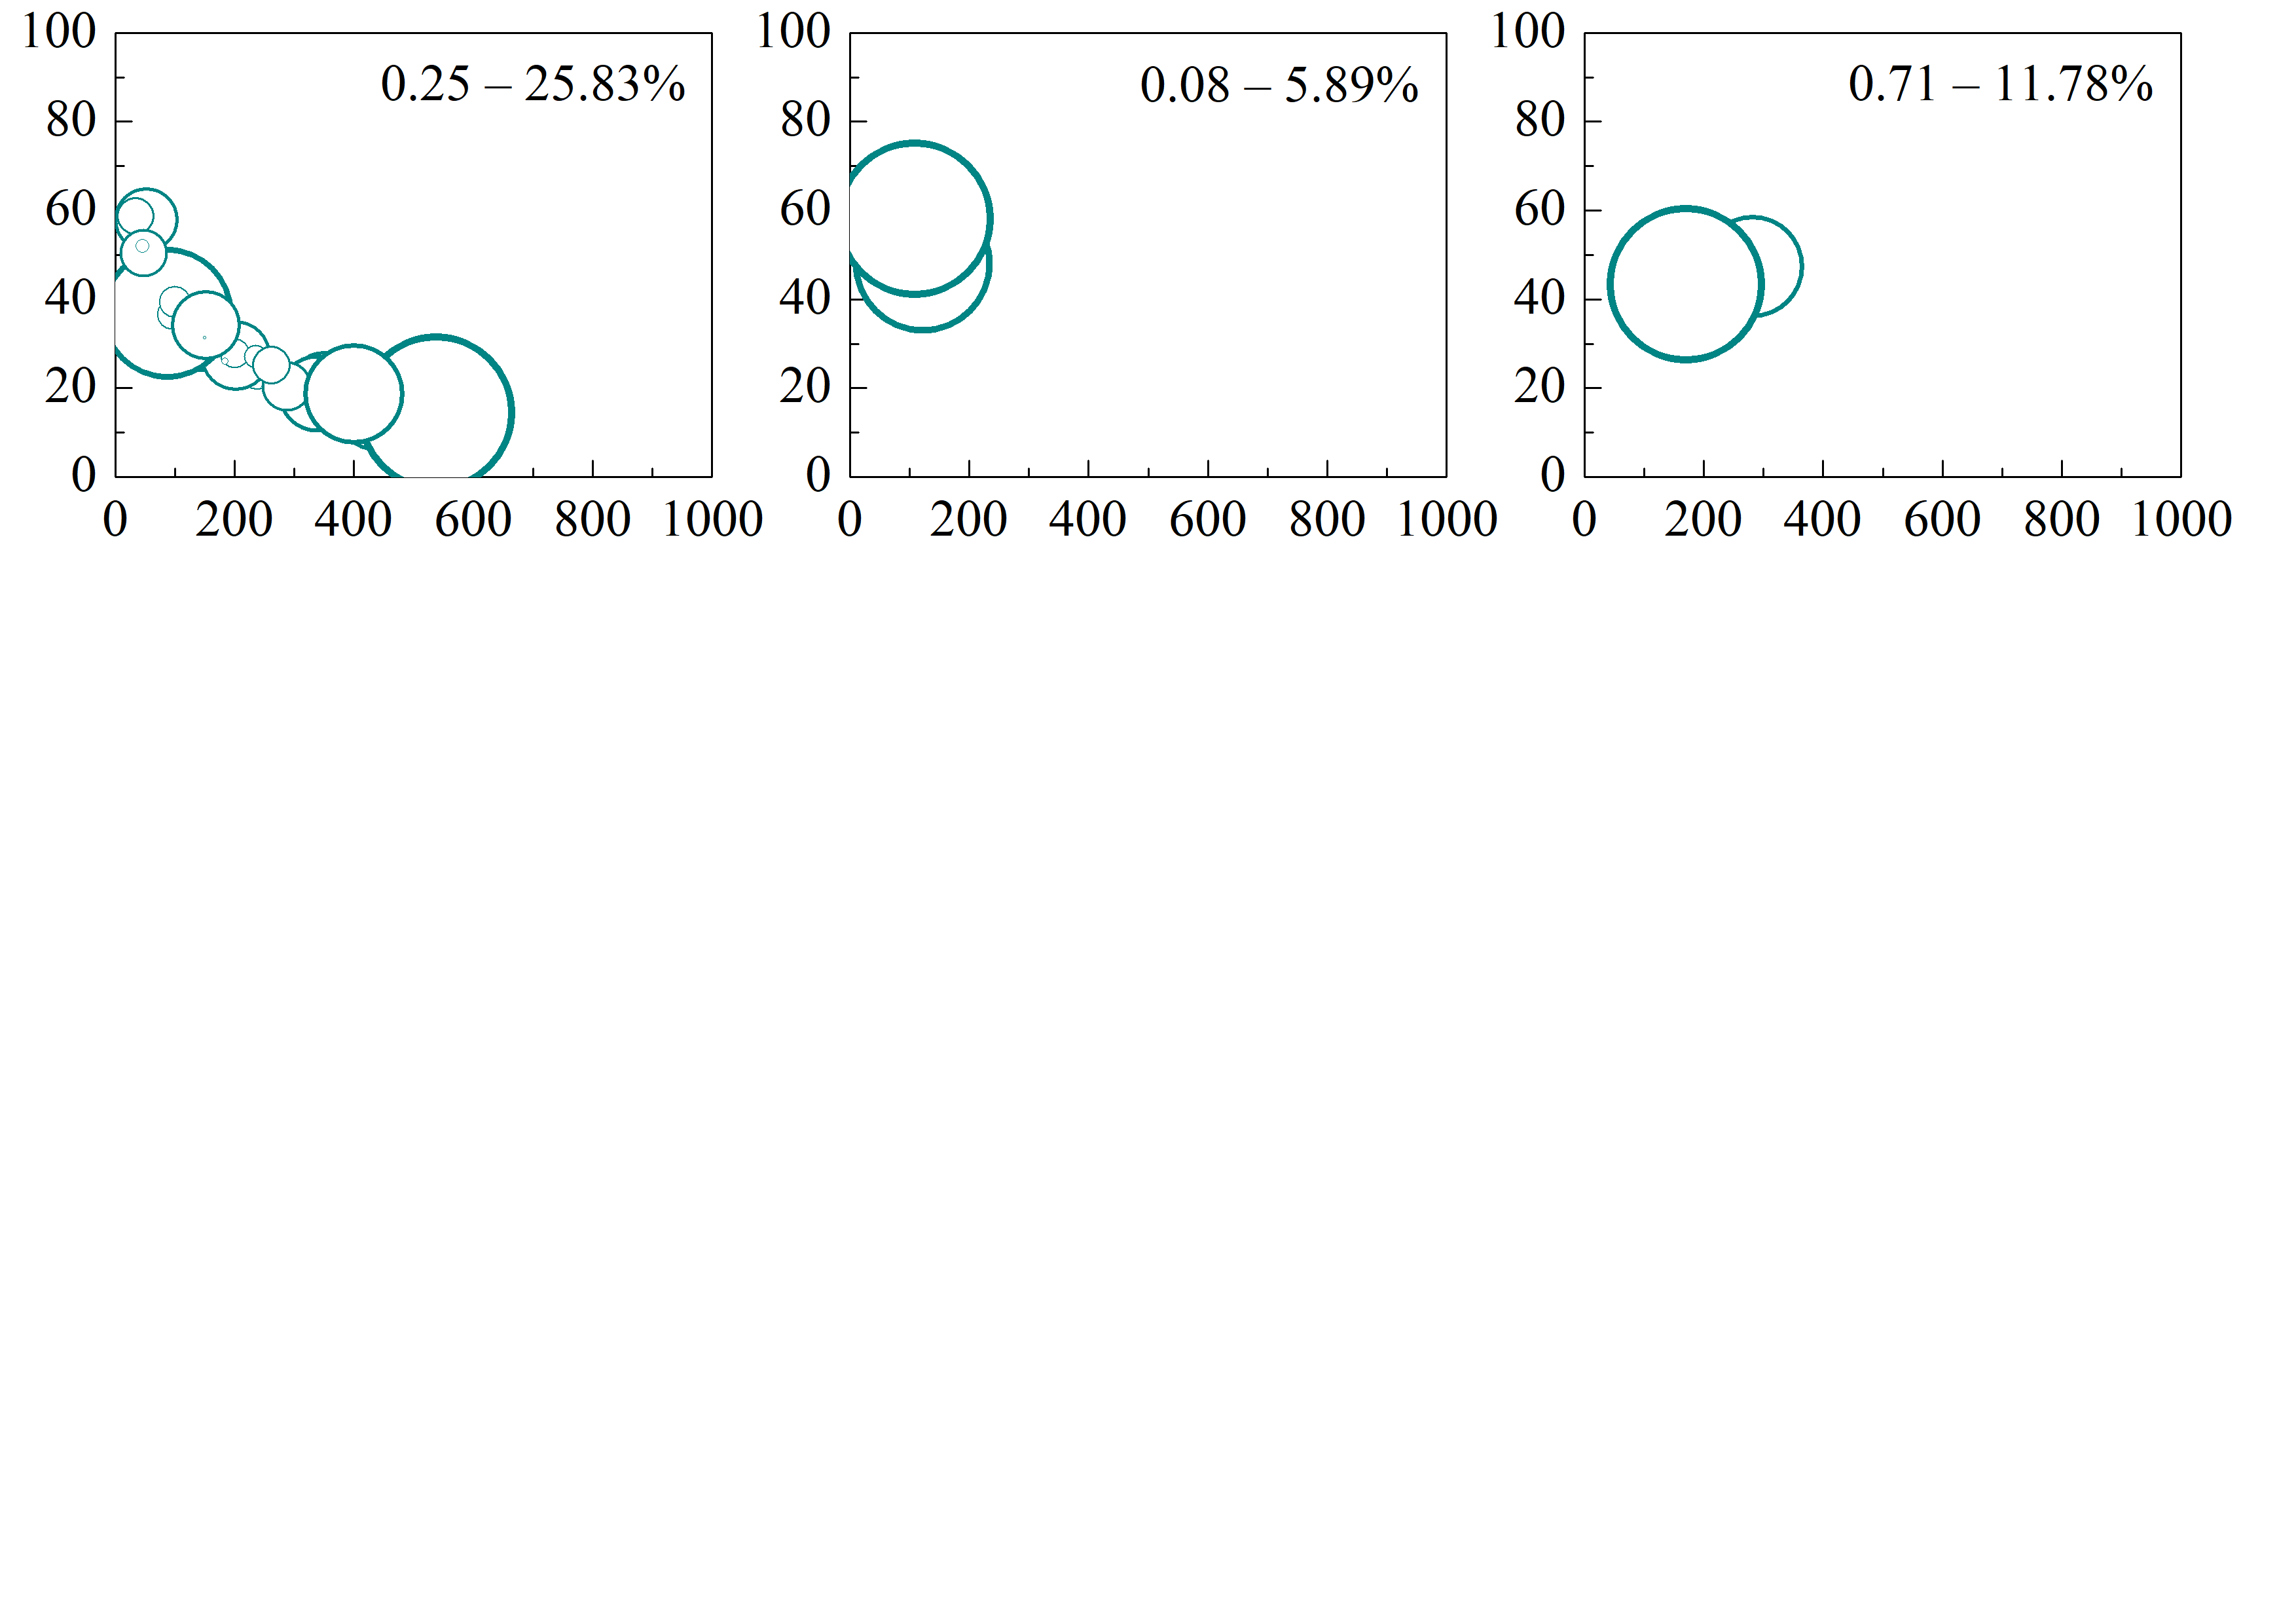* | | | | | | | | |
| *g) Other halogenated* | | *h) Sulfur* | | | *i) Silicon* | | |
| *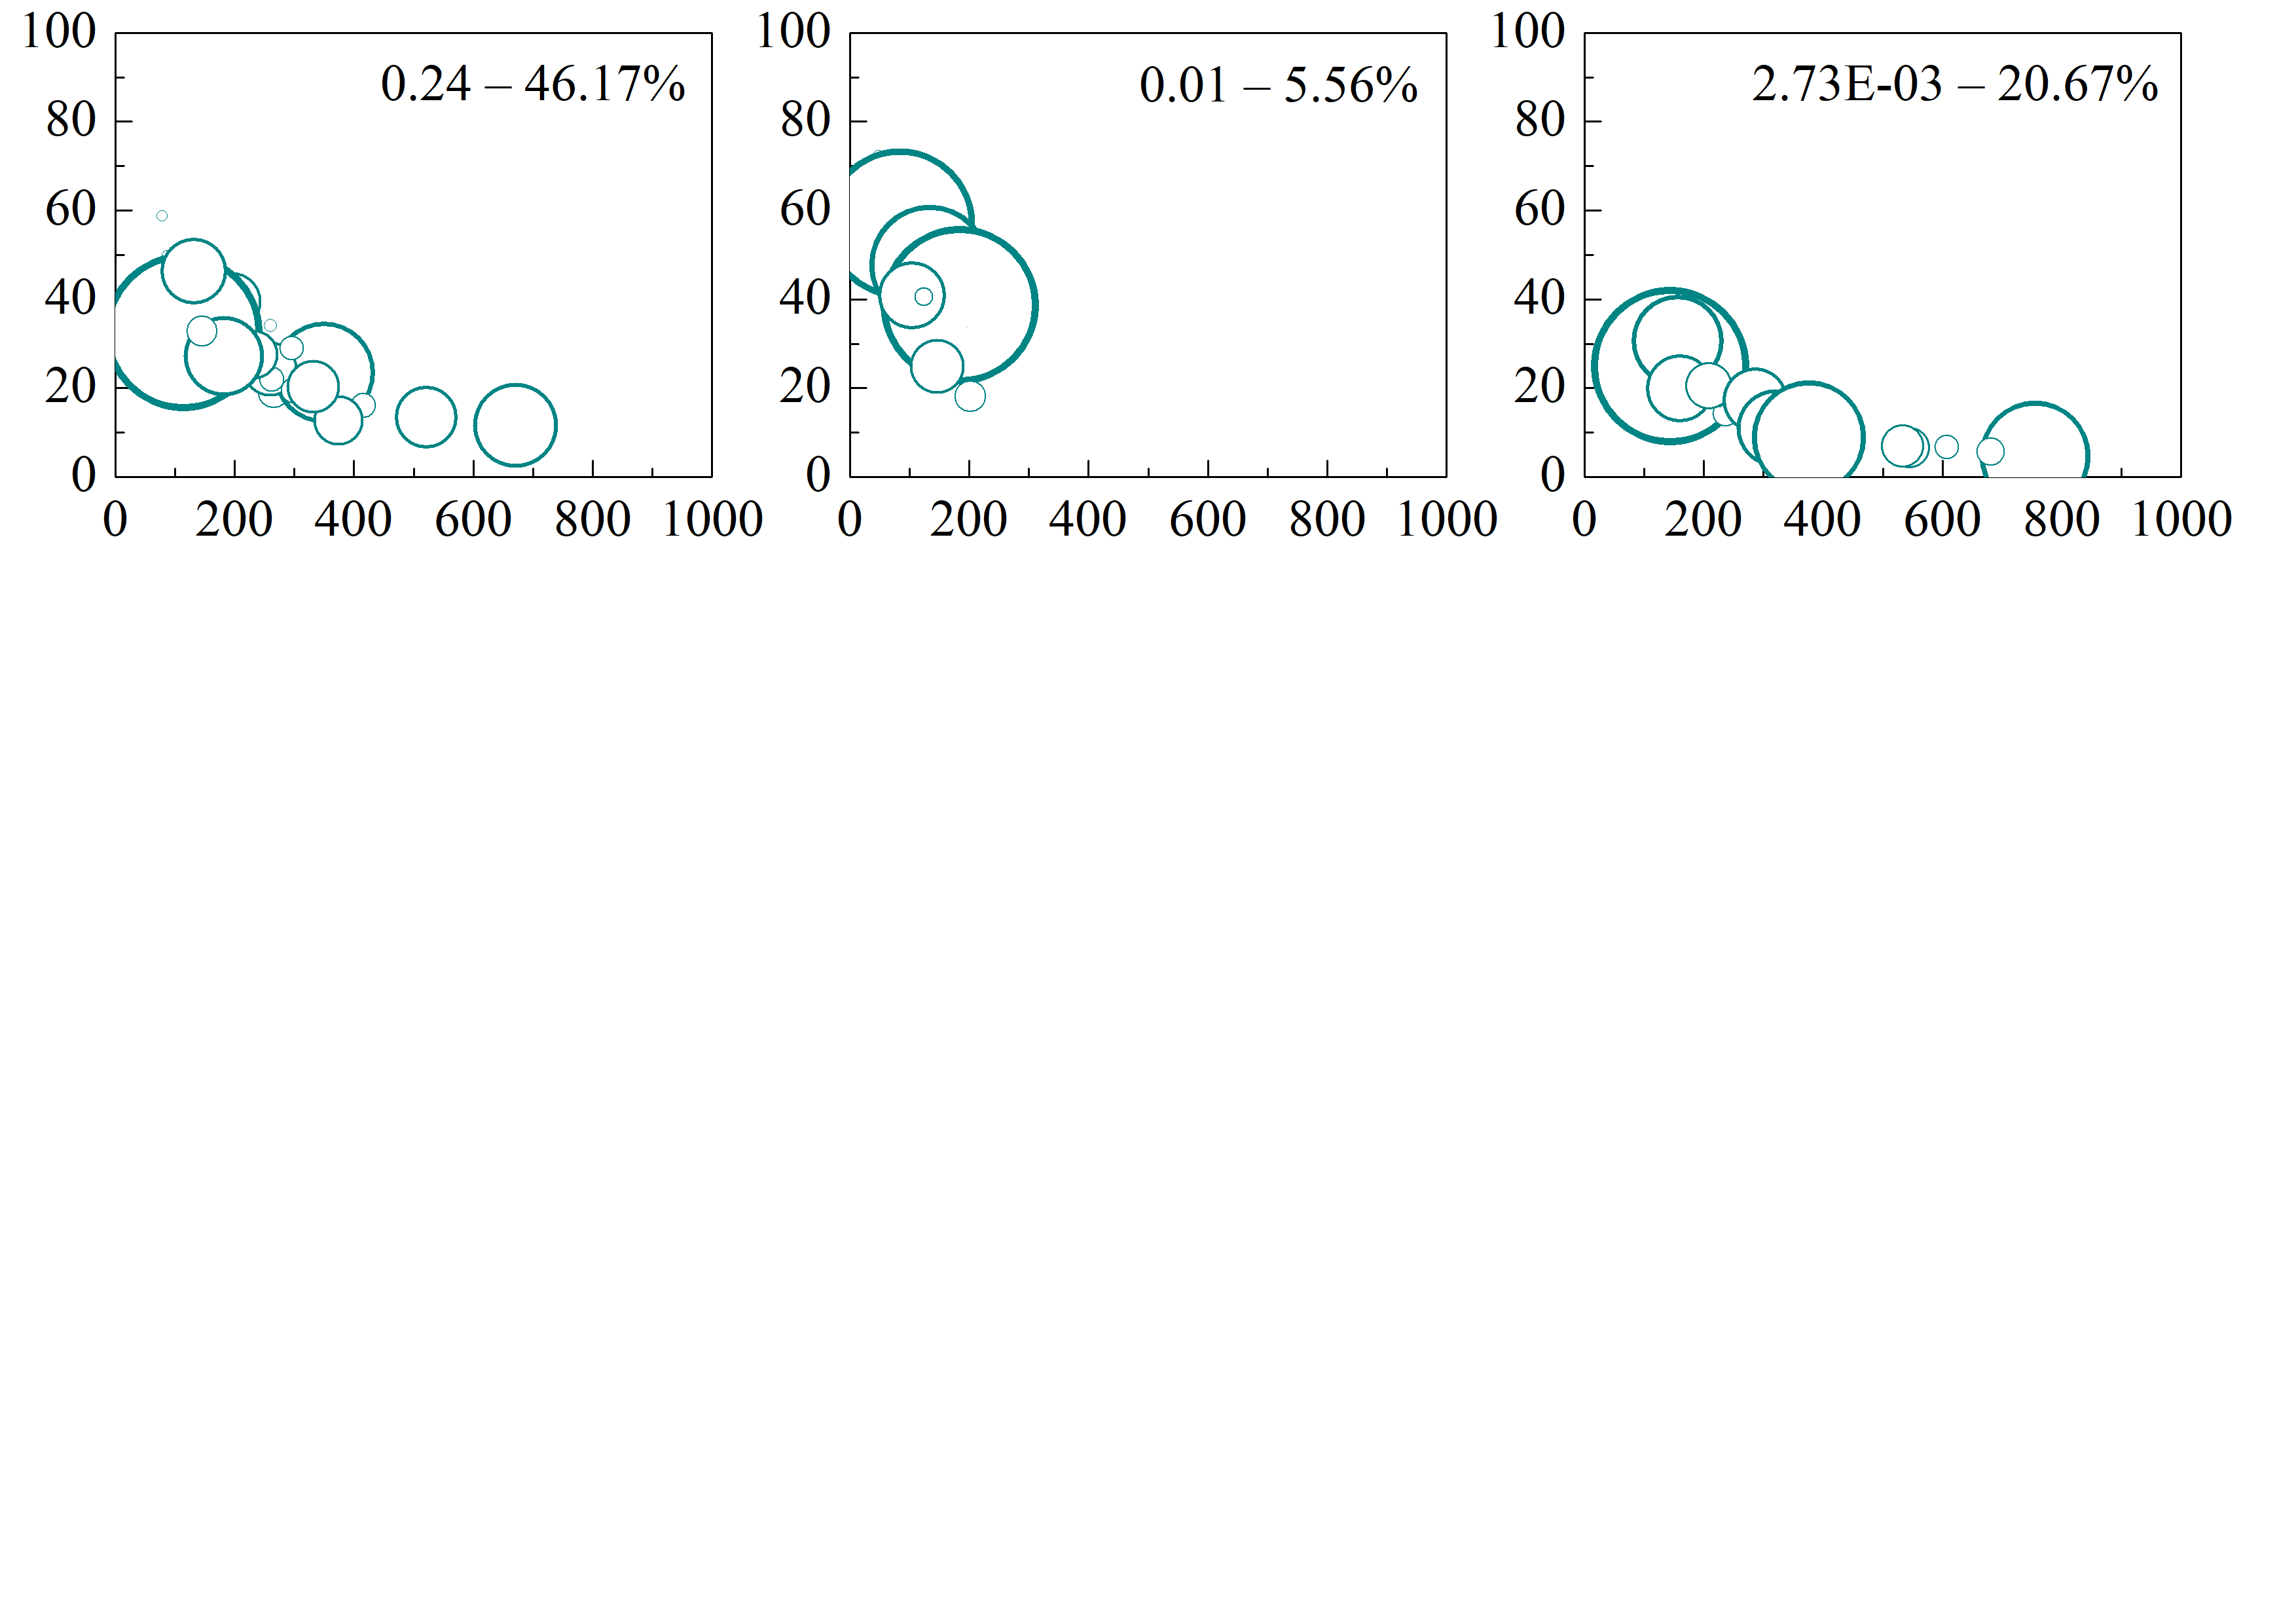* | | | | | | | | |
|  | *j) Iron* | | | *k) Titanium* | | | | | |
|  | *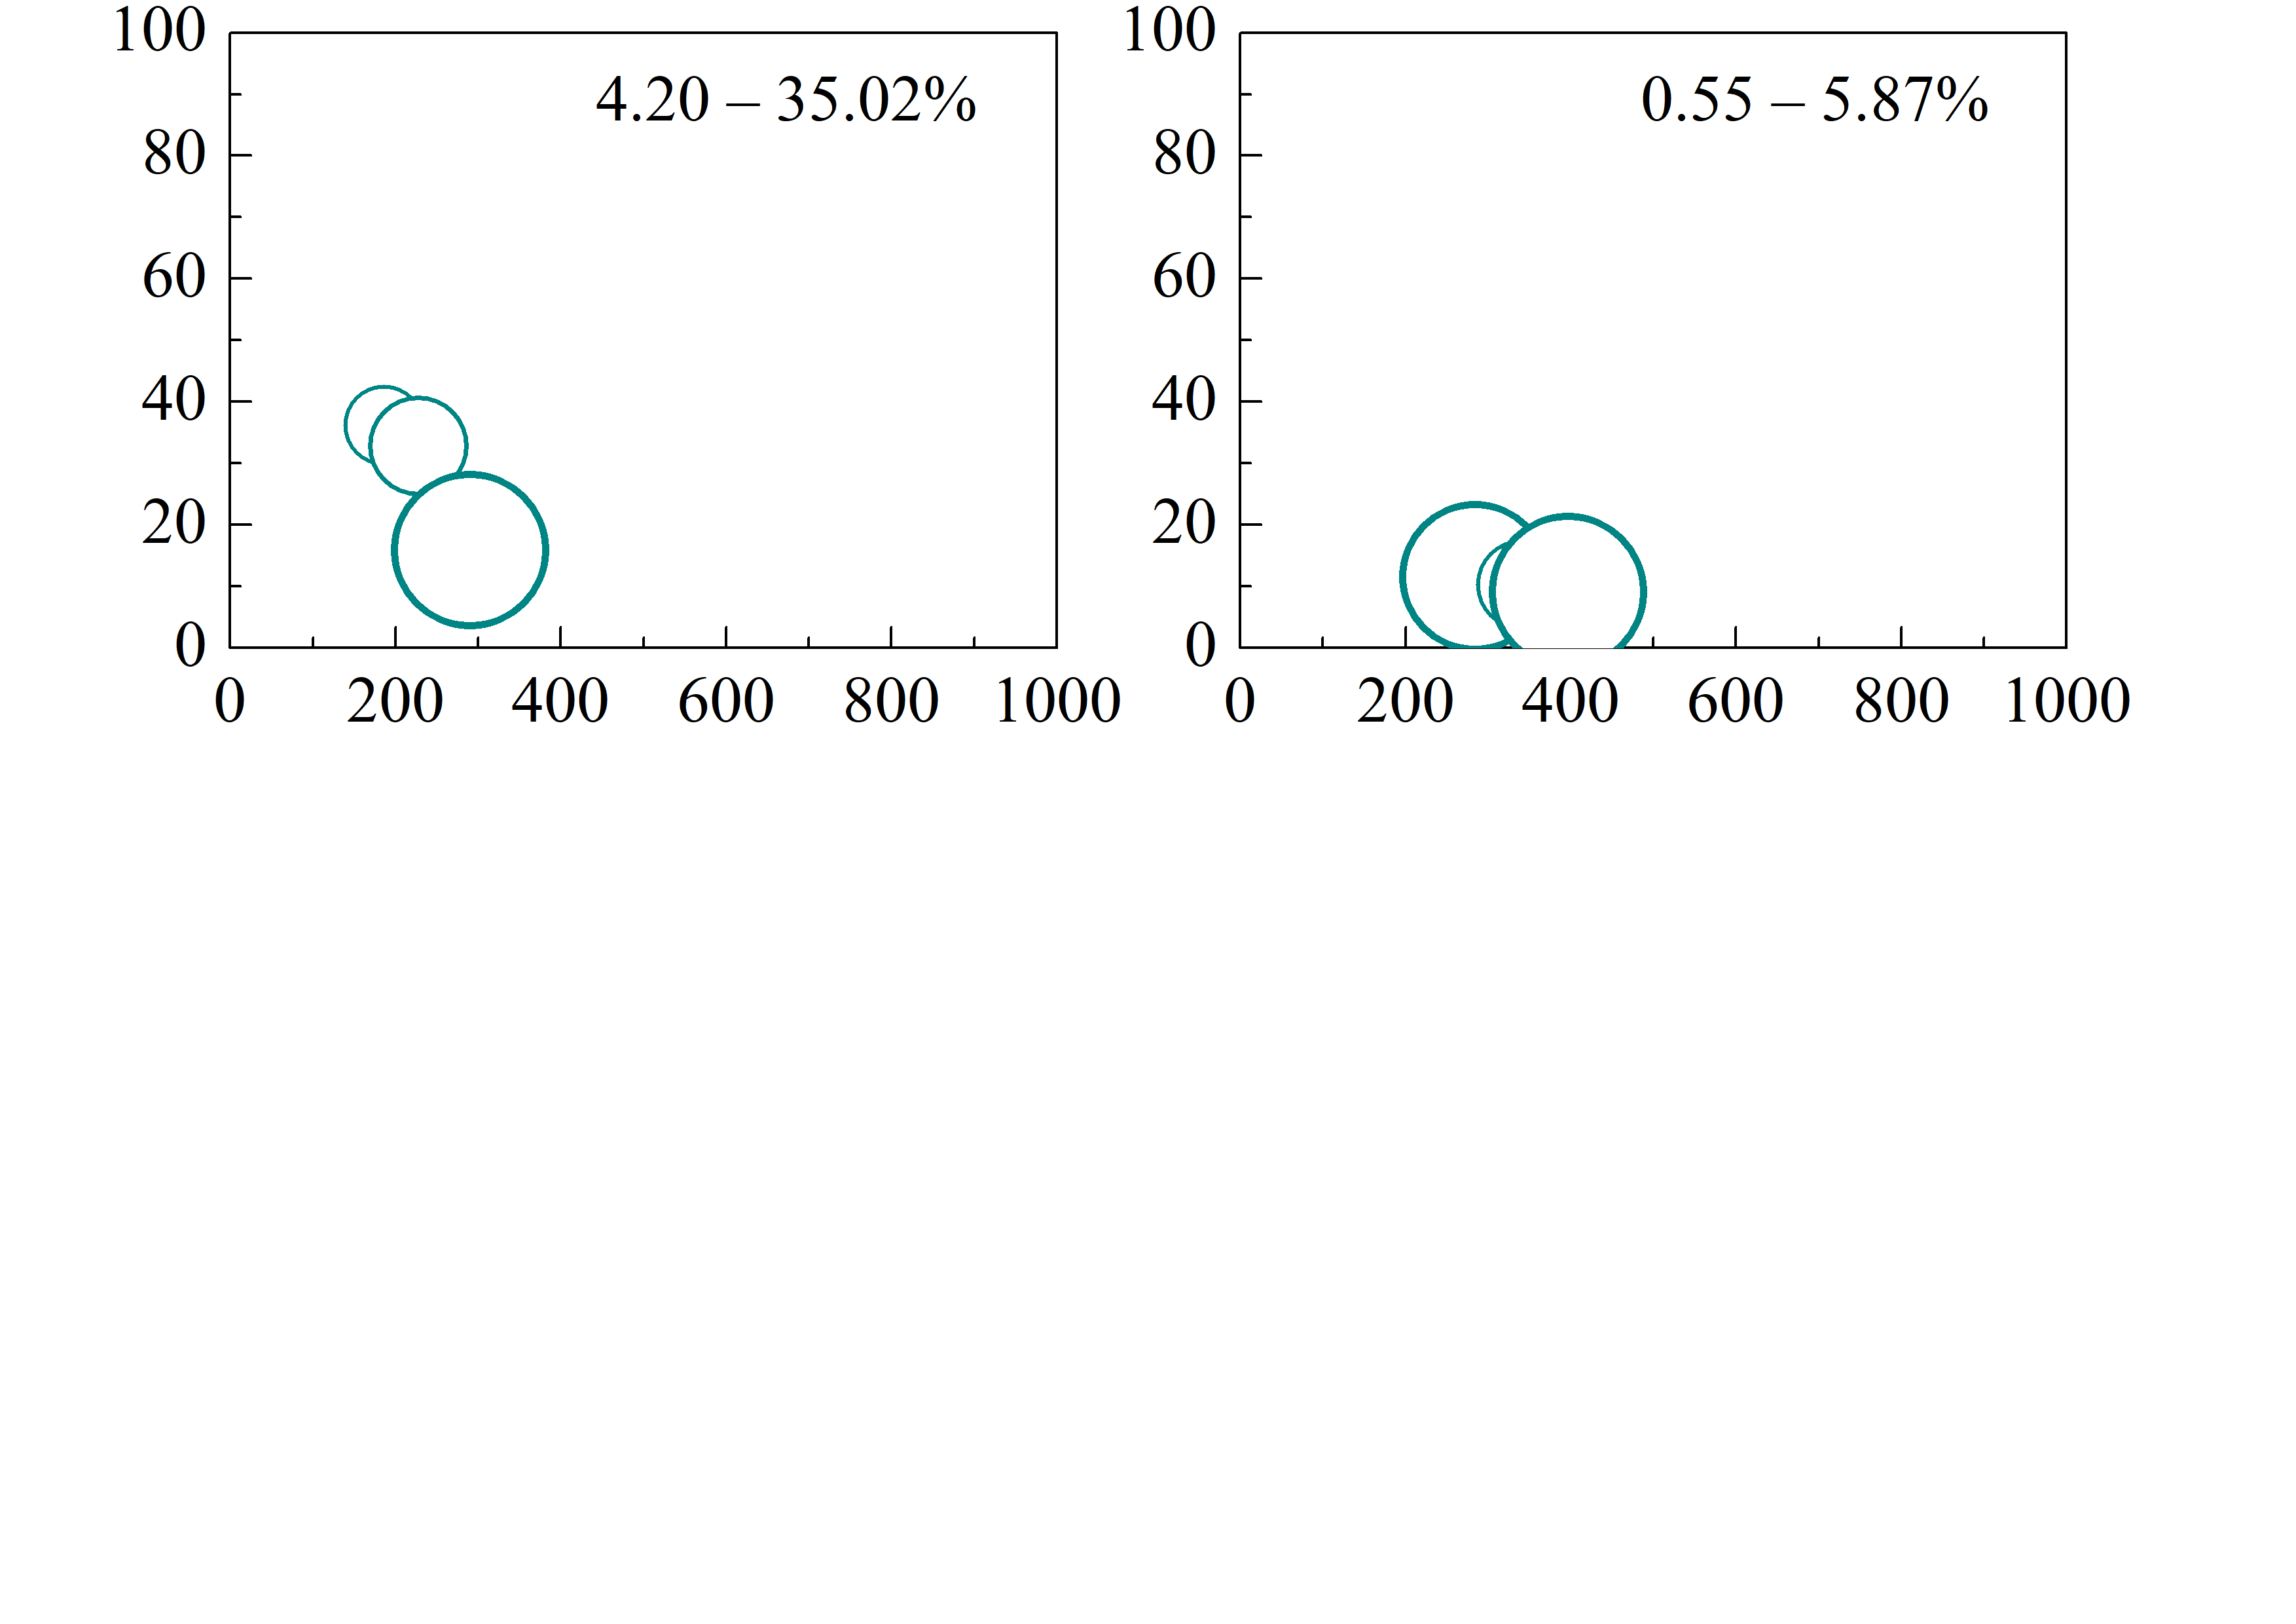* | | | | | | | | |
|  | *Molecular weight, g/mol* | | | | | | | | |

Compounds with the highest deviations: 3-methyl-1-nitrosooxybutane; 2-(2-butoxyethoxy)ethyl ethanoate; 1,2-dichloropropane; docosafluorodecane; bromoethane; 2-iodopropane; trifluoroethanoic acid; dibenzothiophene; tetraethylsilane; benzoylferrocene; tetrapentoxytitanium.

**Figure S6.** *ARD* for the calculation of critical volume with *MVC4* model. The diameter of symbol “O” is directly associated with *ARD* magnitude.

| *Experimental critical volume Vc, cm3/mol* | *a) Alkane* | *b) Alkene* | *c) Alkyne* |
| --- | --- | --- | --- |
| *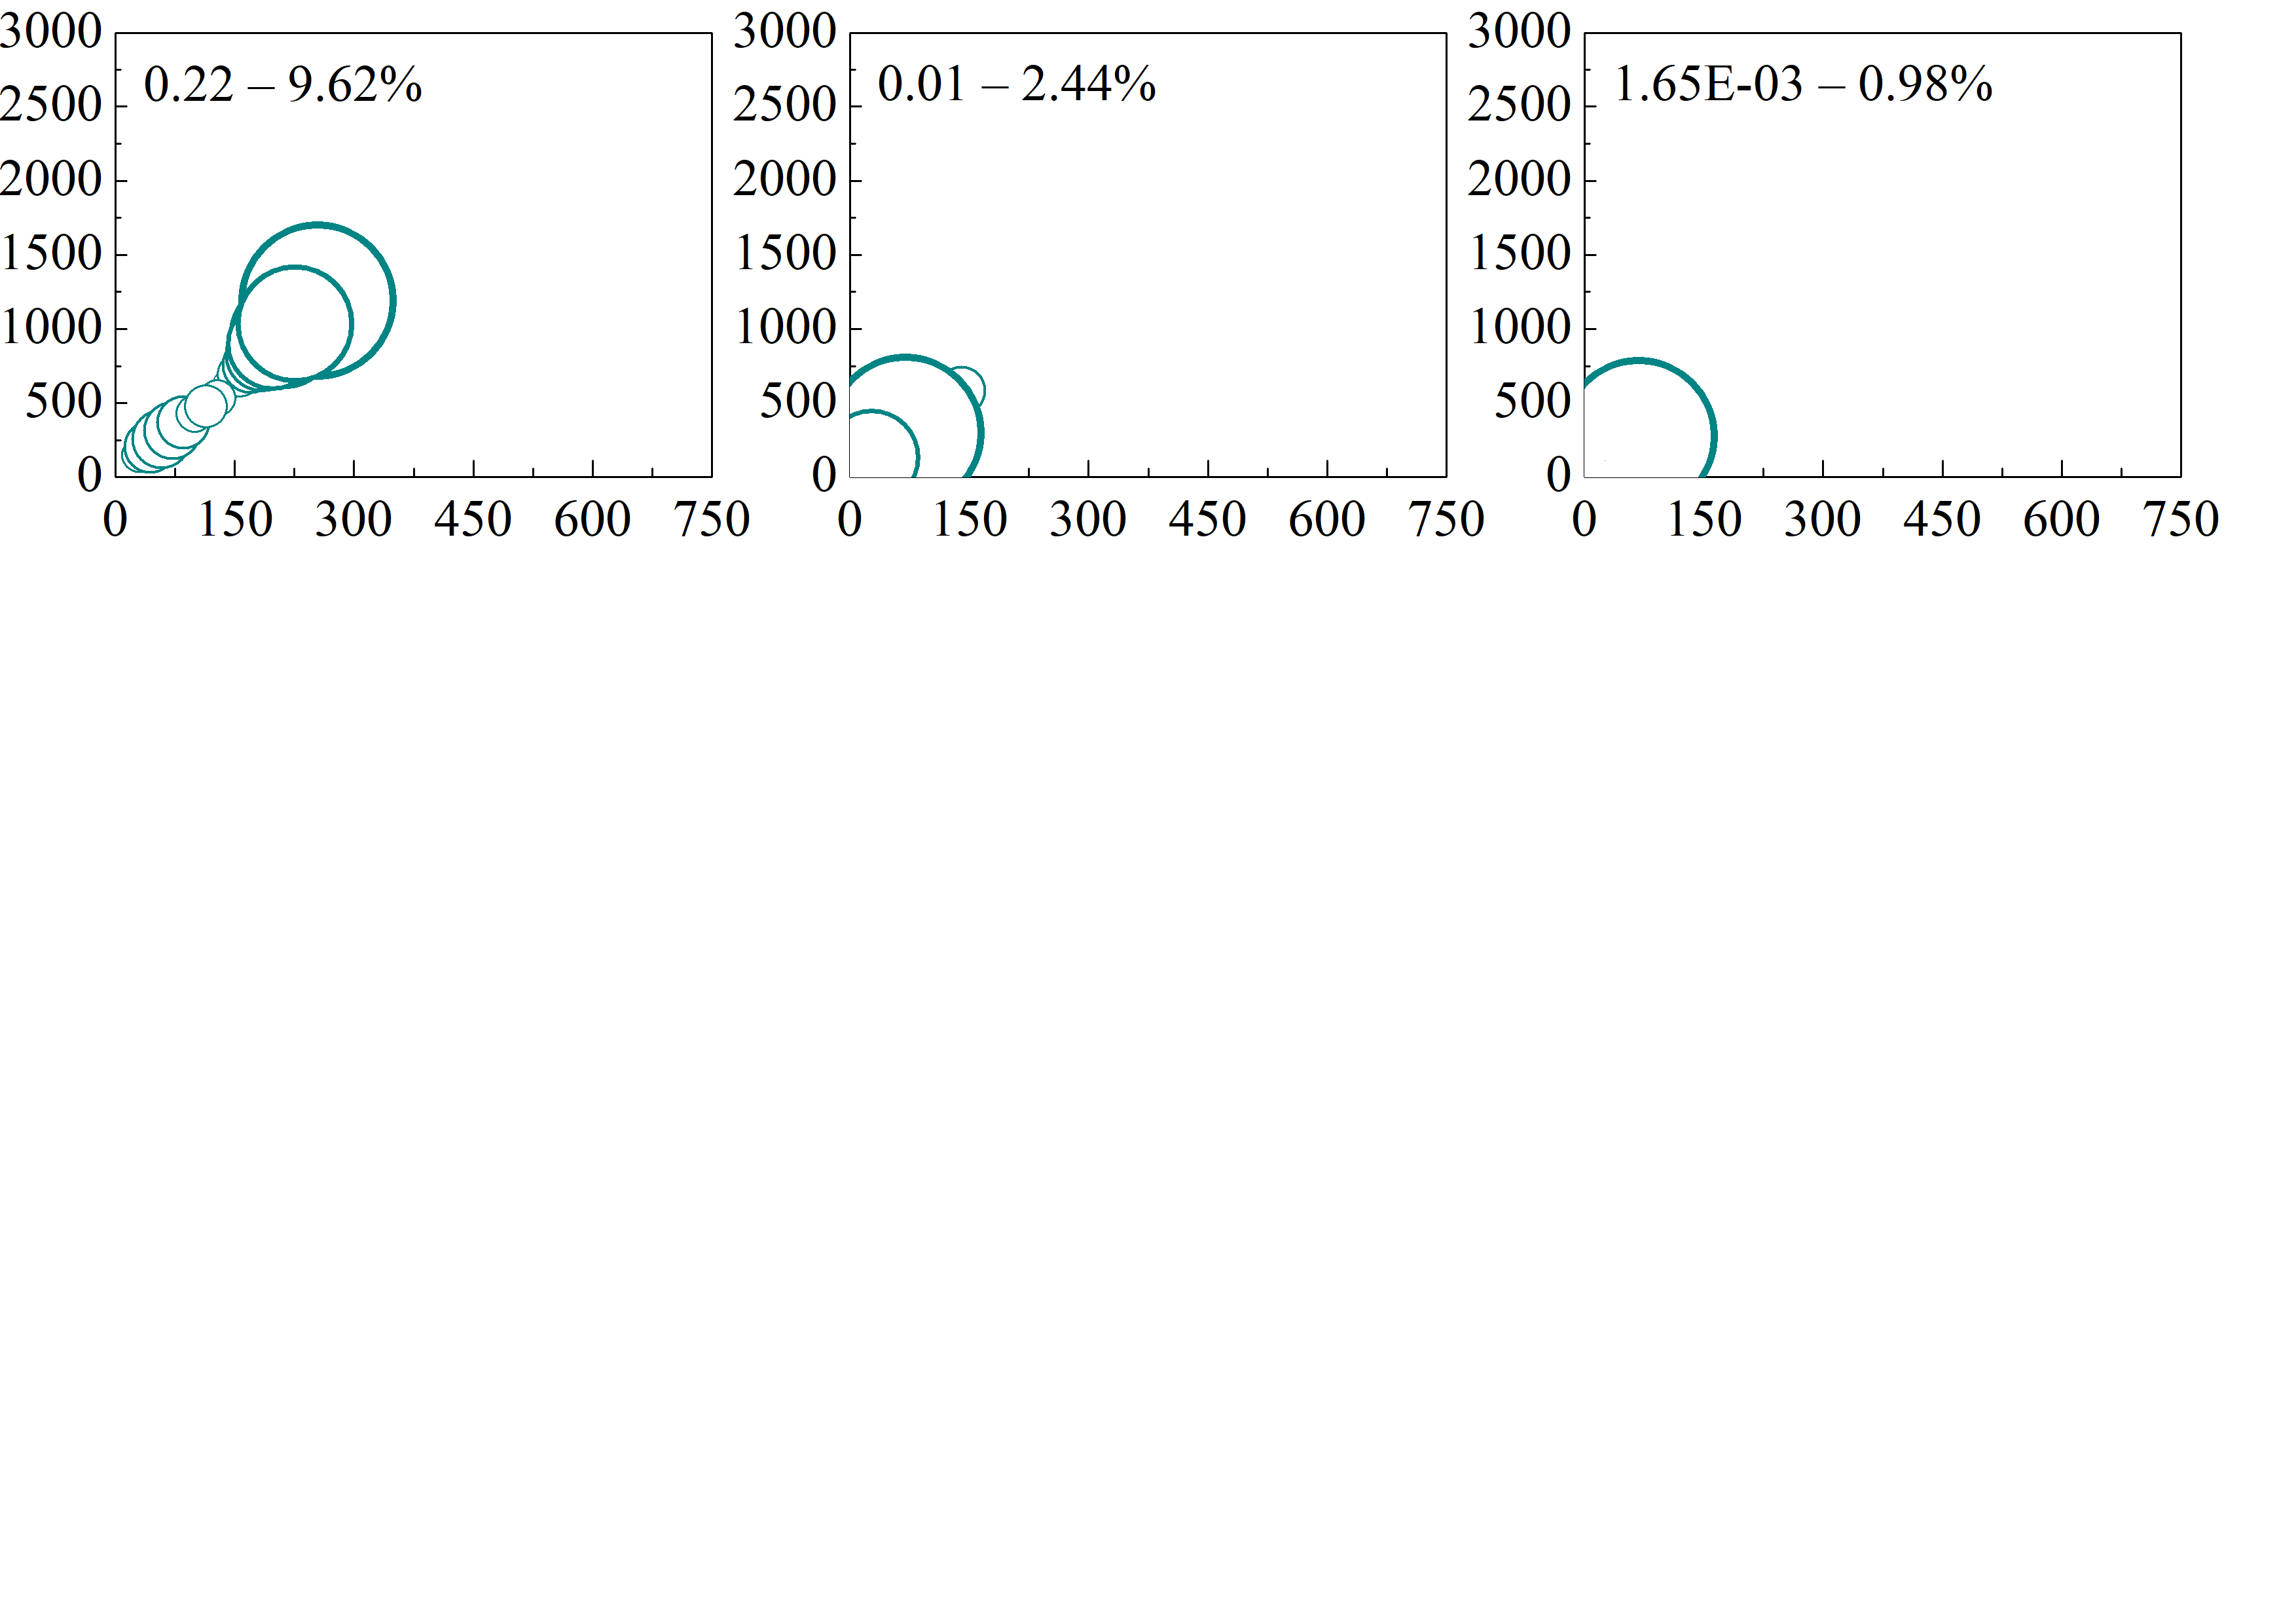* | | | |
| *d) Cyclic hydrocarbon* | *e) Aromatic hydrocarbon* | *f) Alcohol* |
| *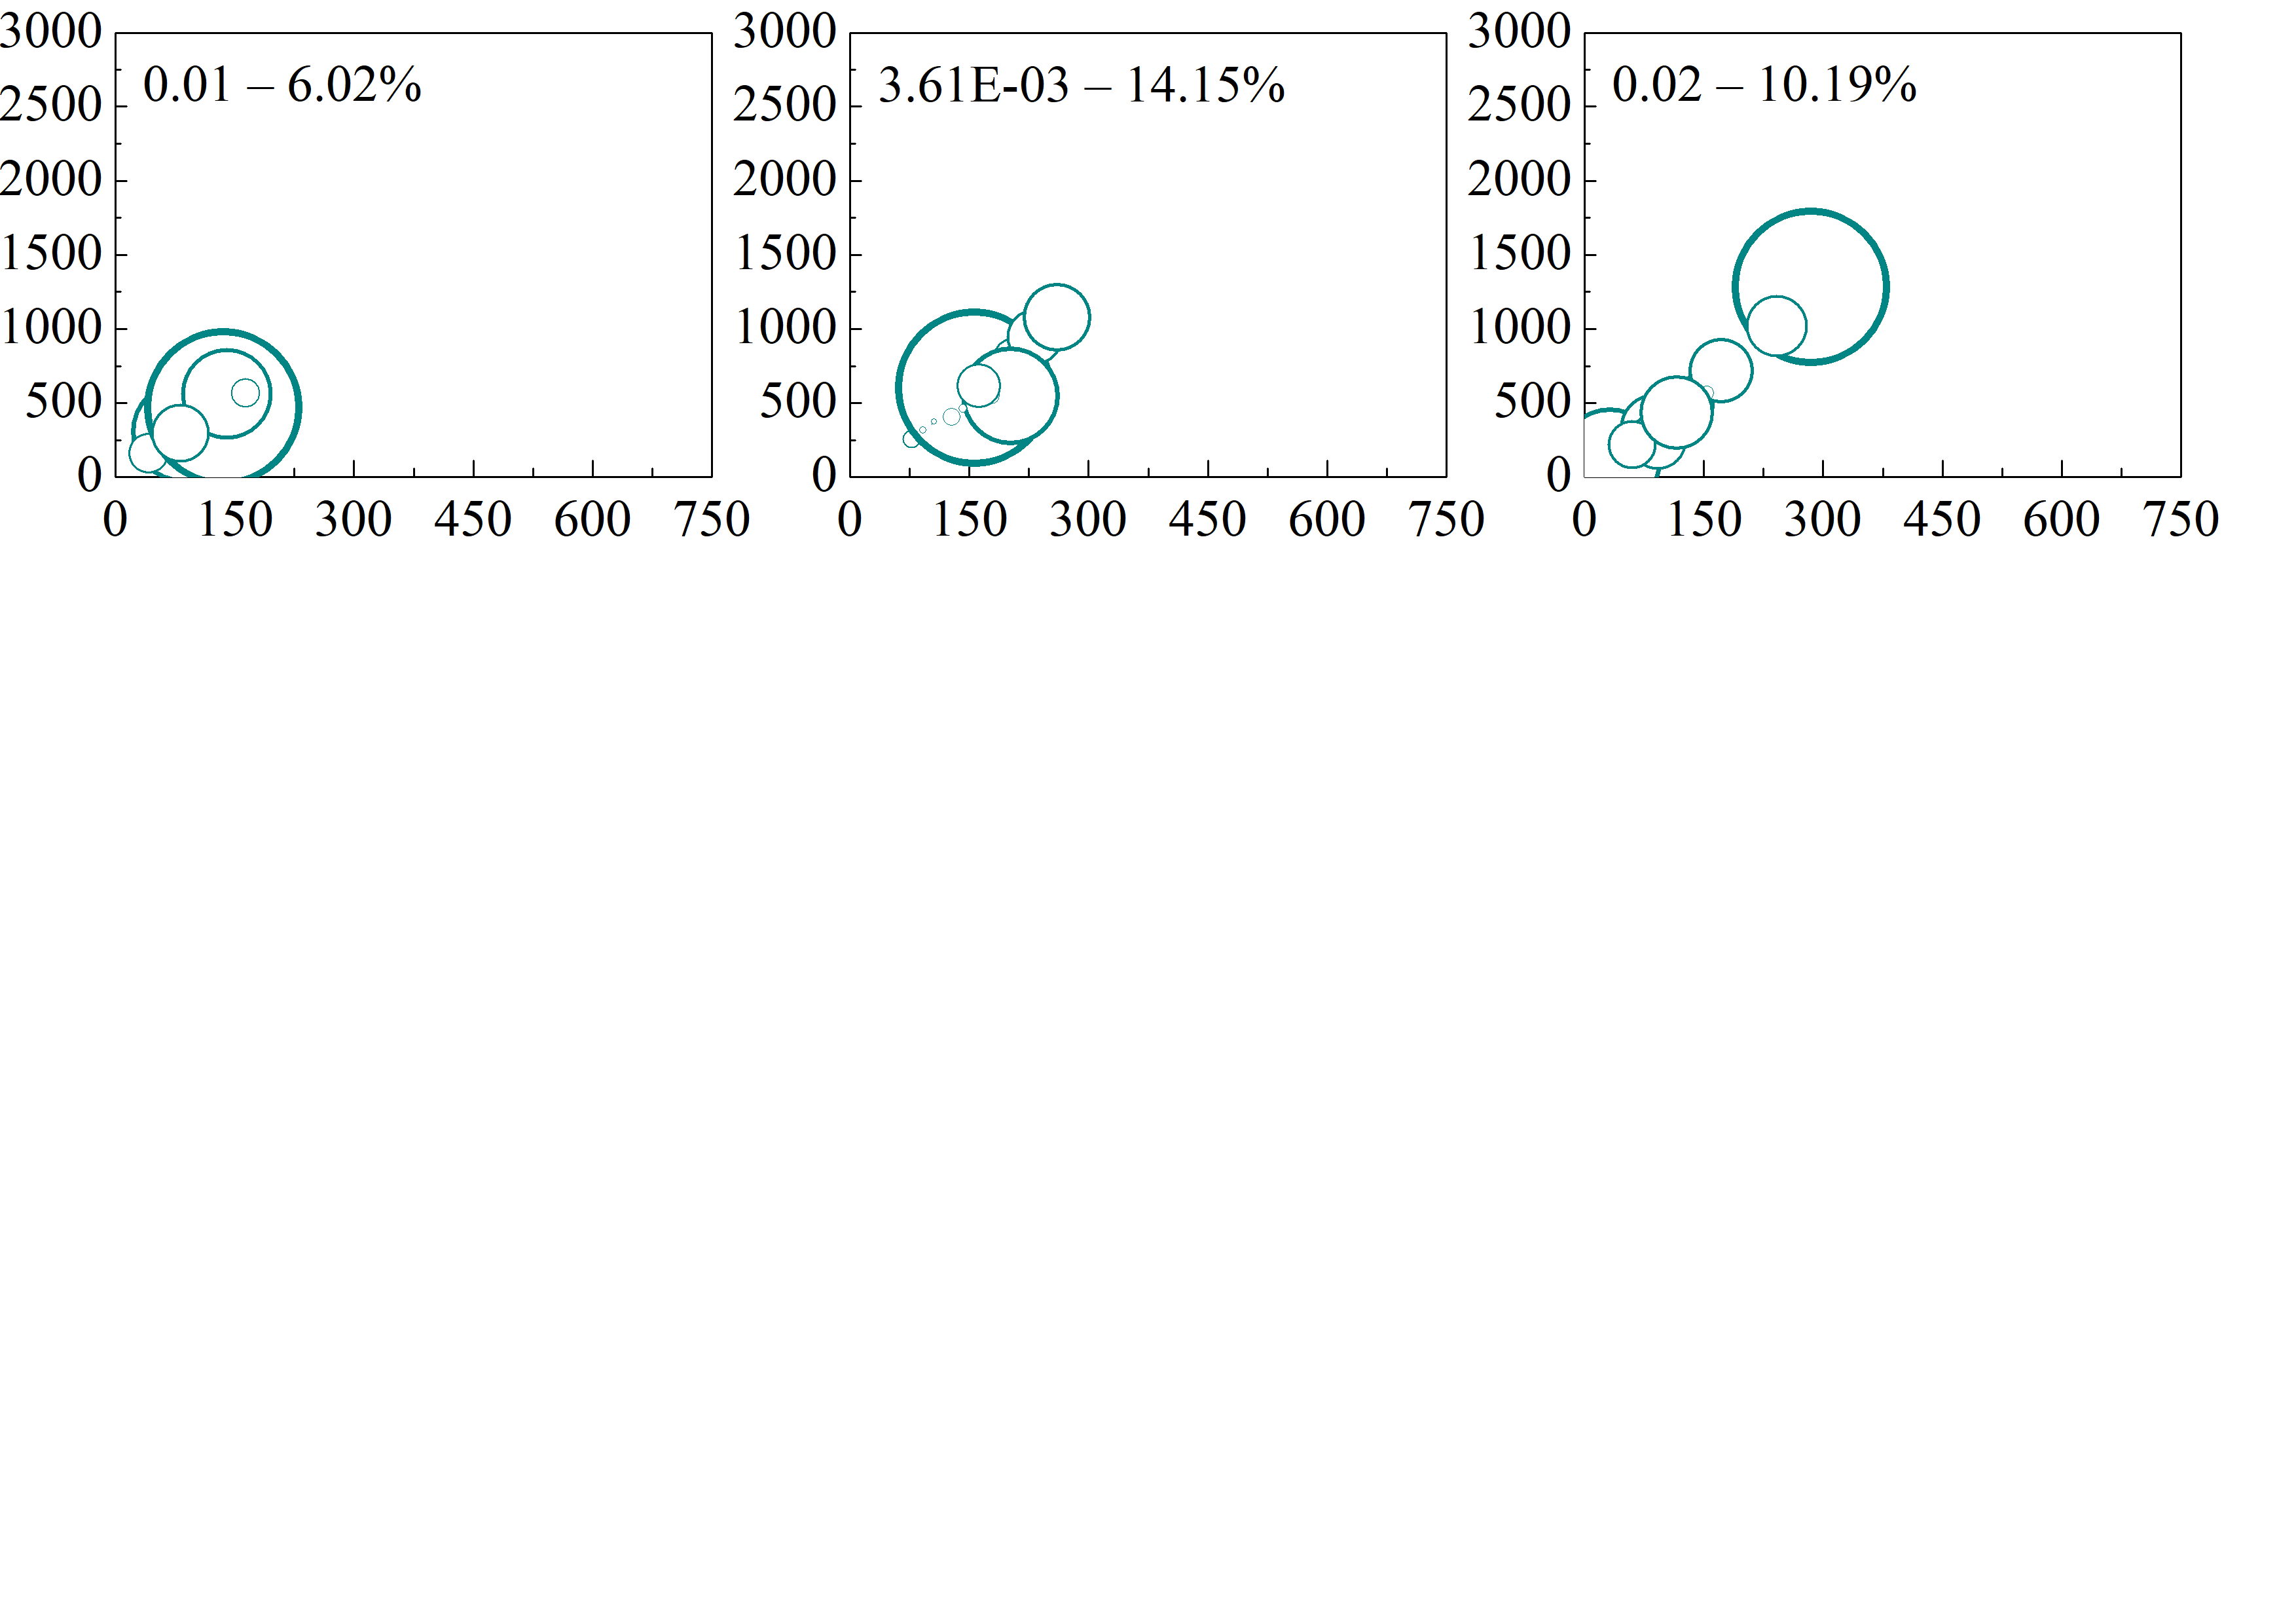* | | | |
| *g) Phenol* | *h) Carboxylic acid* | *i) Aldehyde* |
| *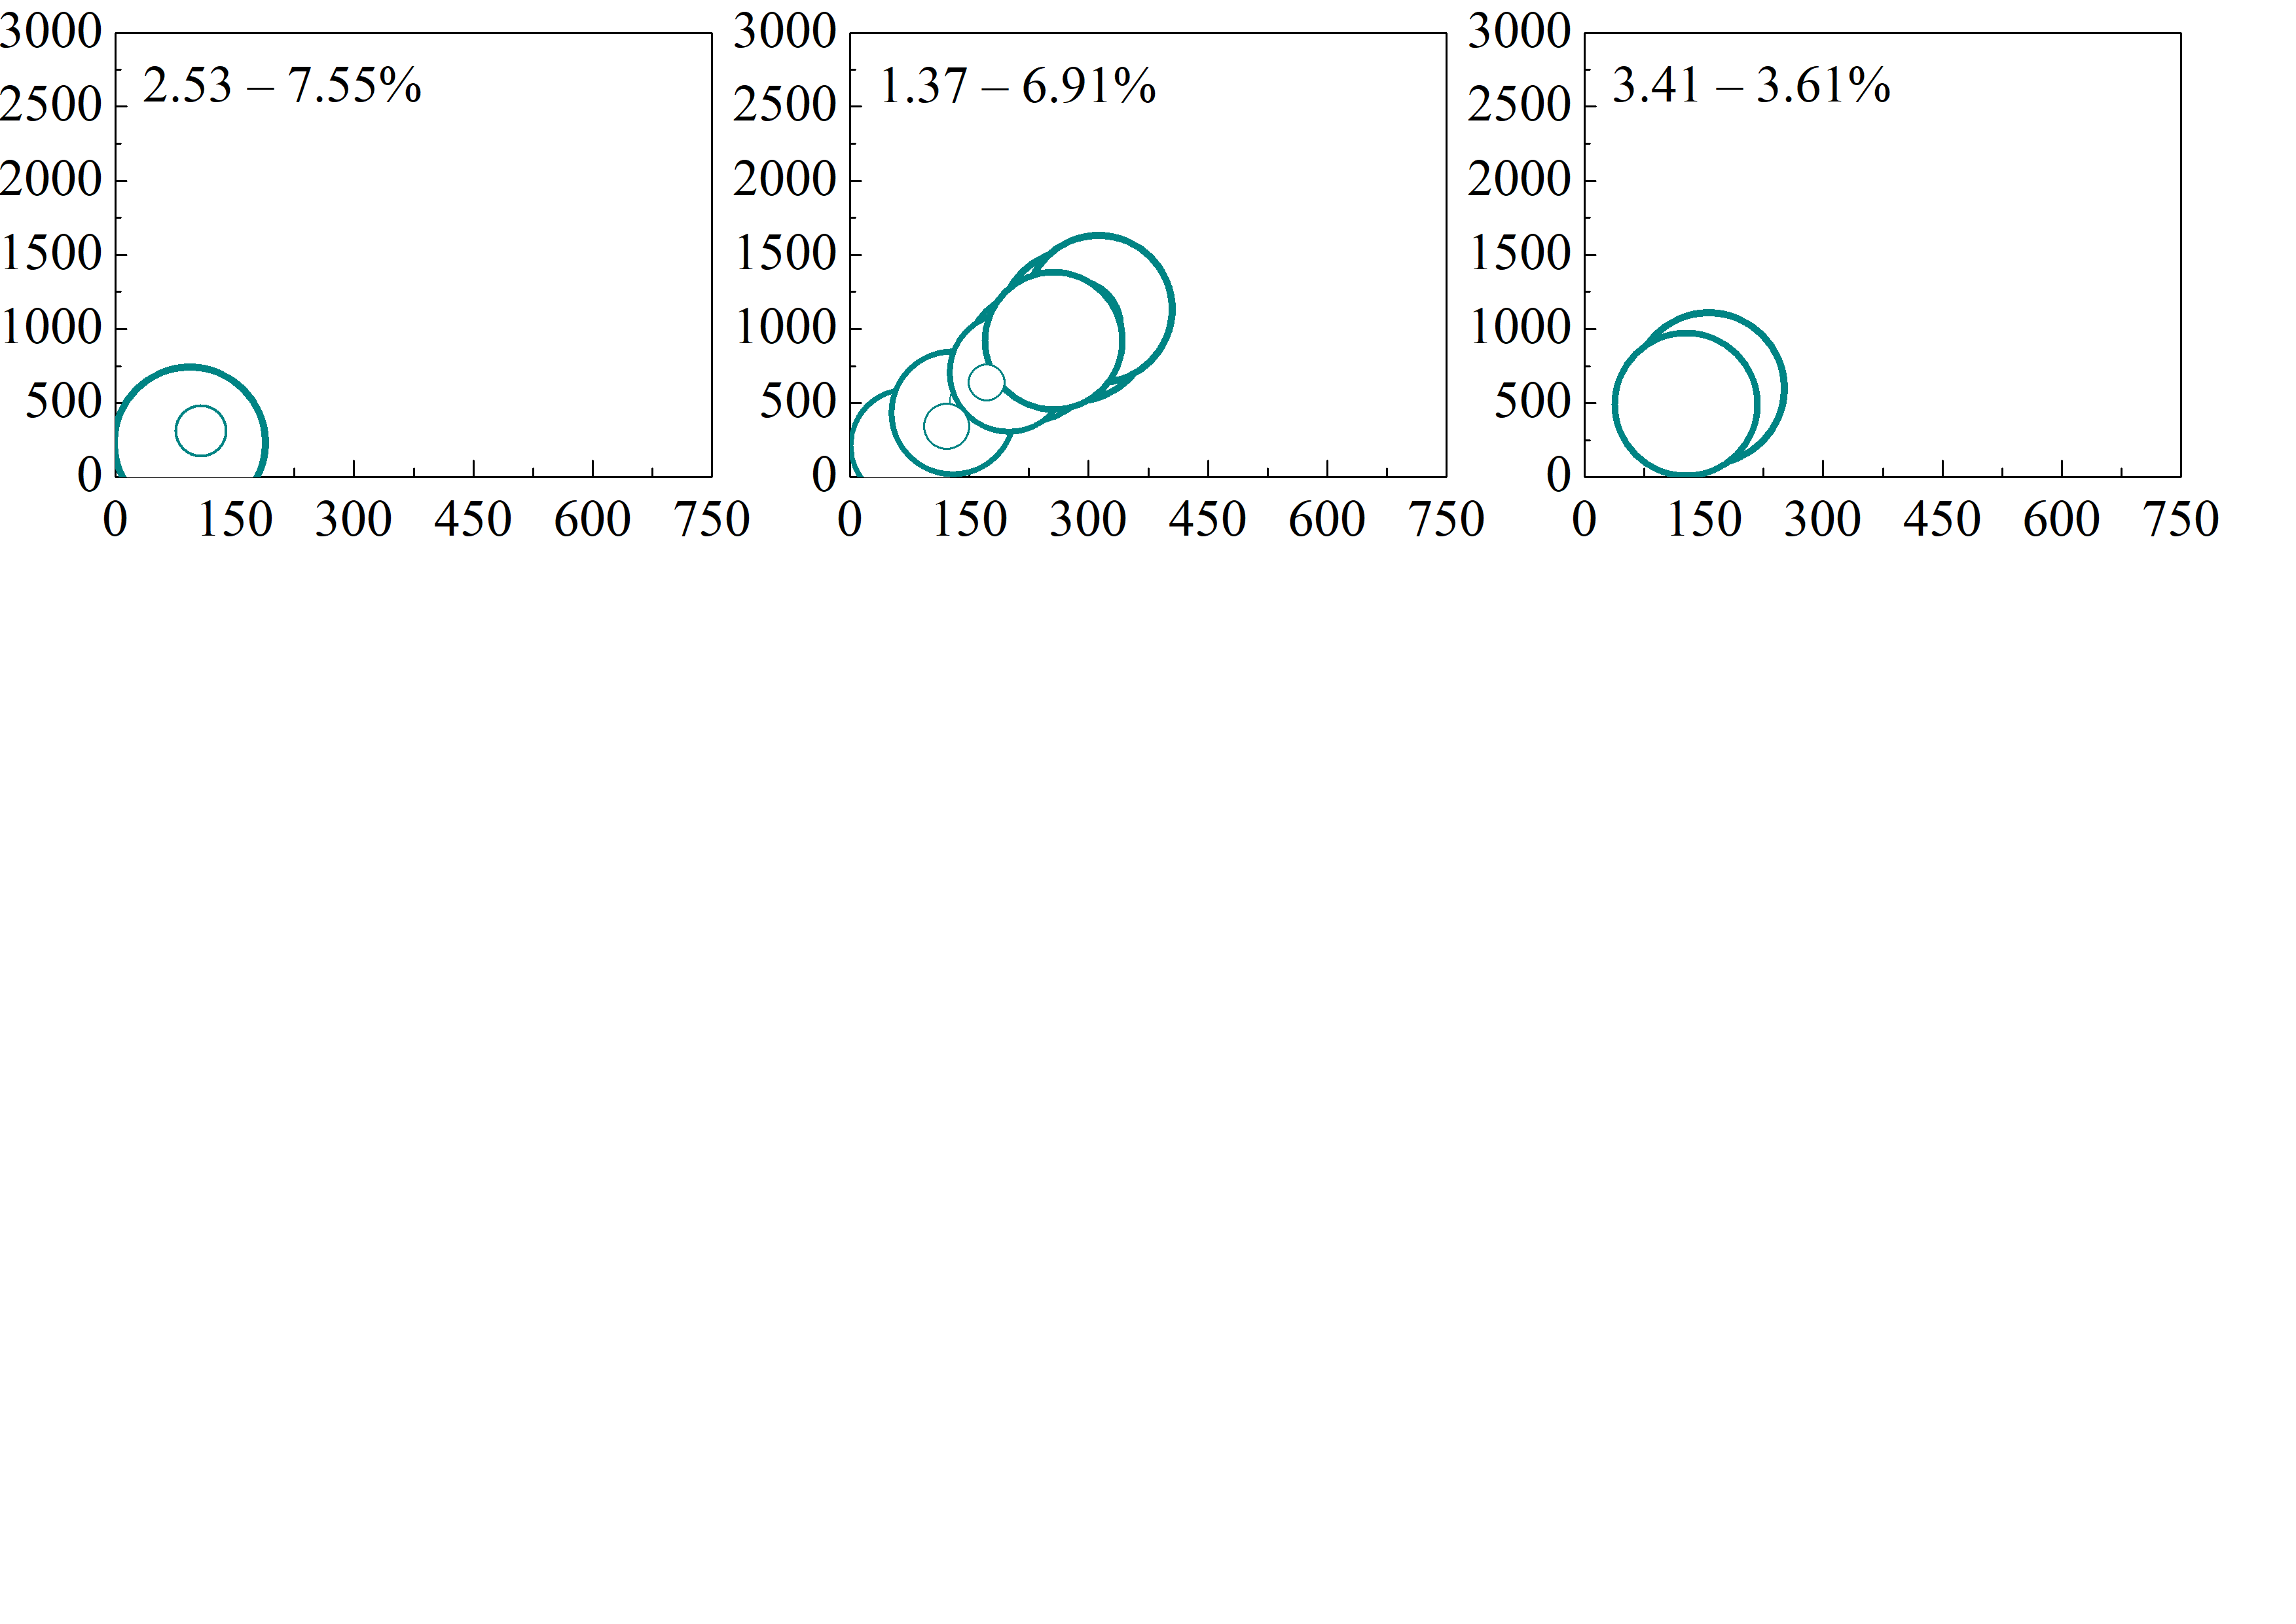* | | | |
| *j) Ketone* | *k) Ether* | *l) Ester* |
| *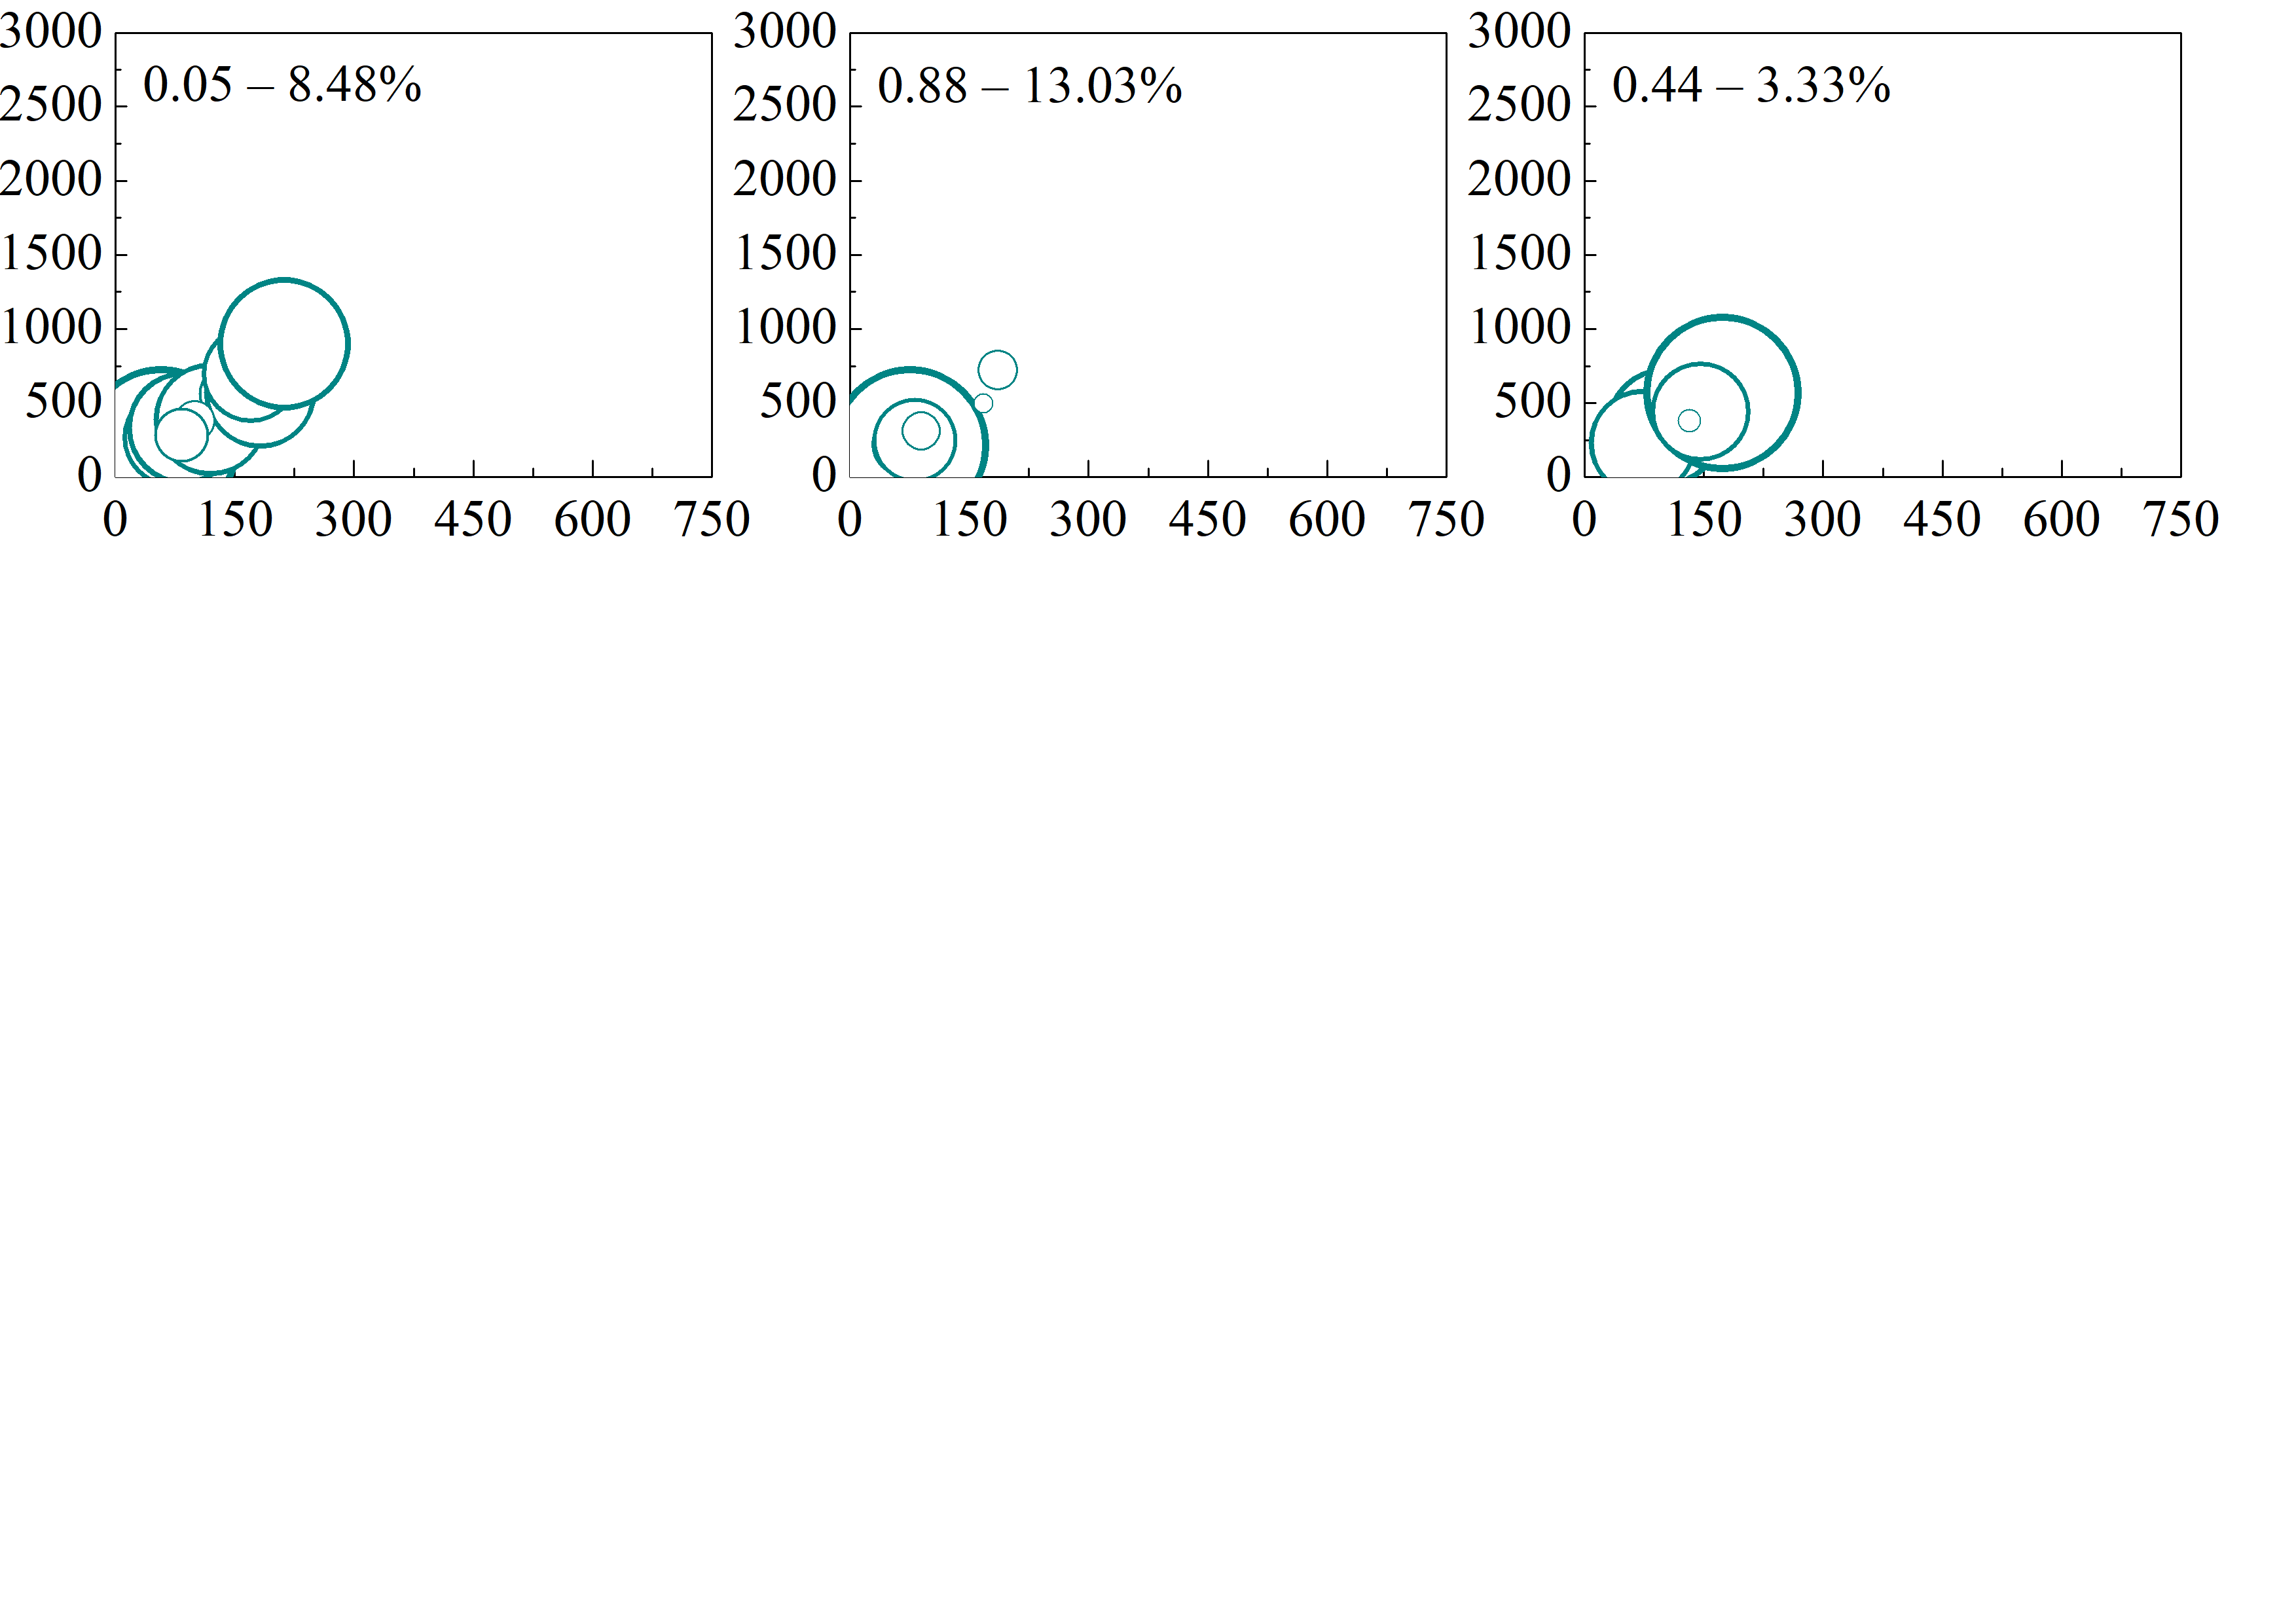* | | | |
|  | *Molecular weight, g/mol* | | | |

*ARD* values are shown as a function of *MM* and *Vc* for different families where the magnitude of *ARD* is indicated by the size of the symbol “O”. Compounds with the highest deviations: octadecane; 2-methyl-2-butene; 3-methyl-1-butyne; limonene; 2,7-dimethylnaphthalene; 1-nonadecanol; phenol; stearic acid; 1-decanal; acetone; methylal; diethyl butanedioate.

**Figure S6 (continuation).**

| *Experimental critical volume Vc, cm3/mol* | *a) Nitrogen* | *b) Multifunctional oxygen* | *c) Chlorine* |
| --- | --- | --- | --- |
| *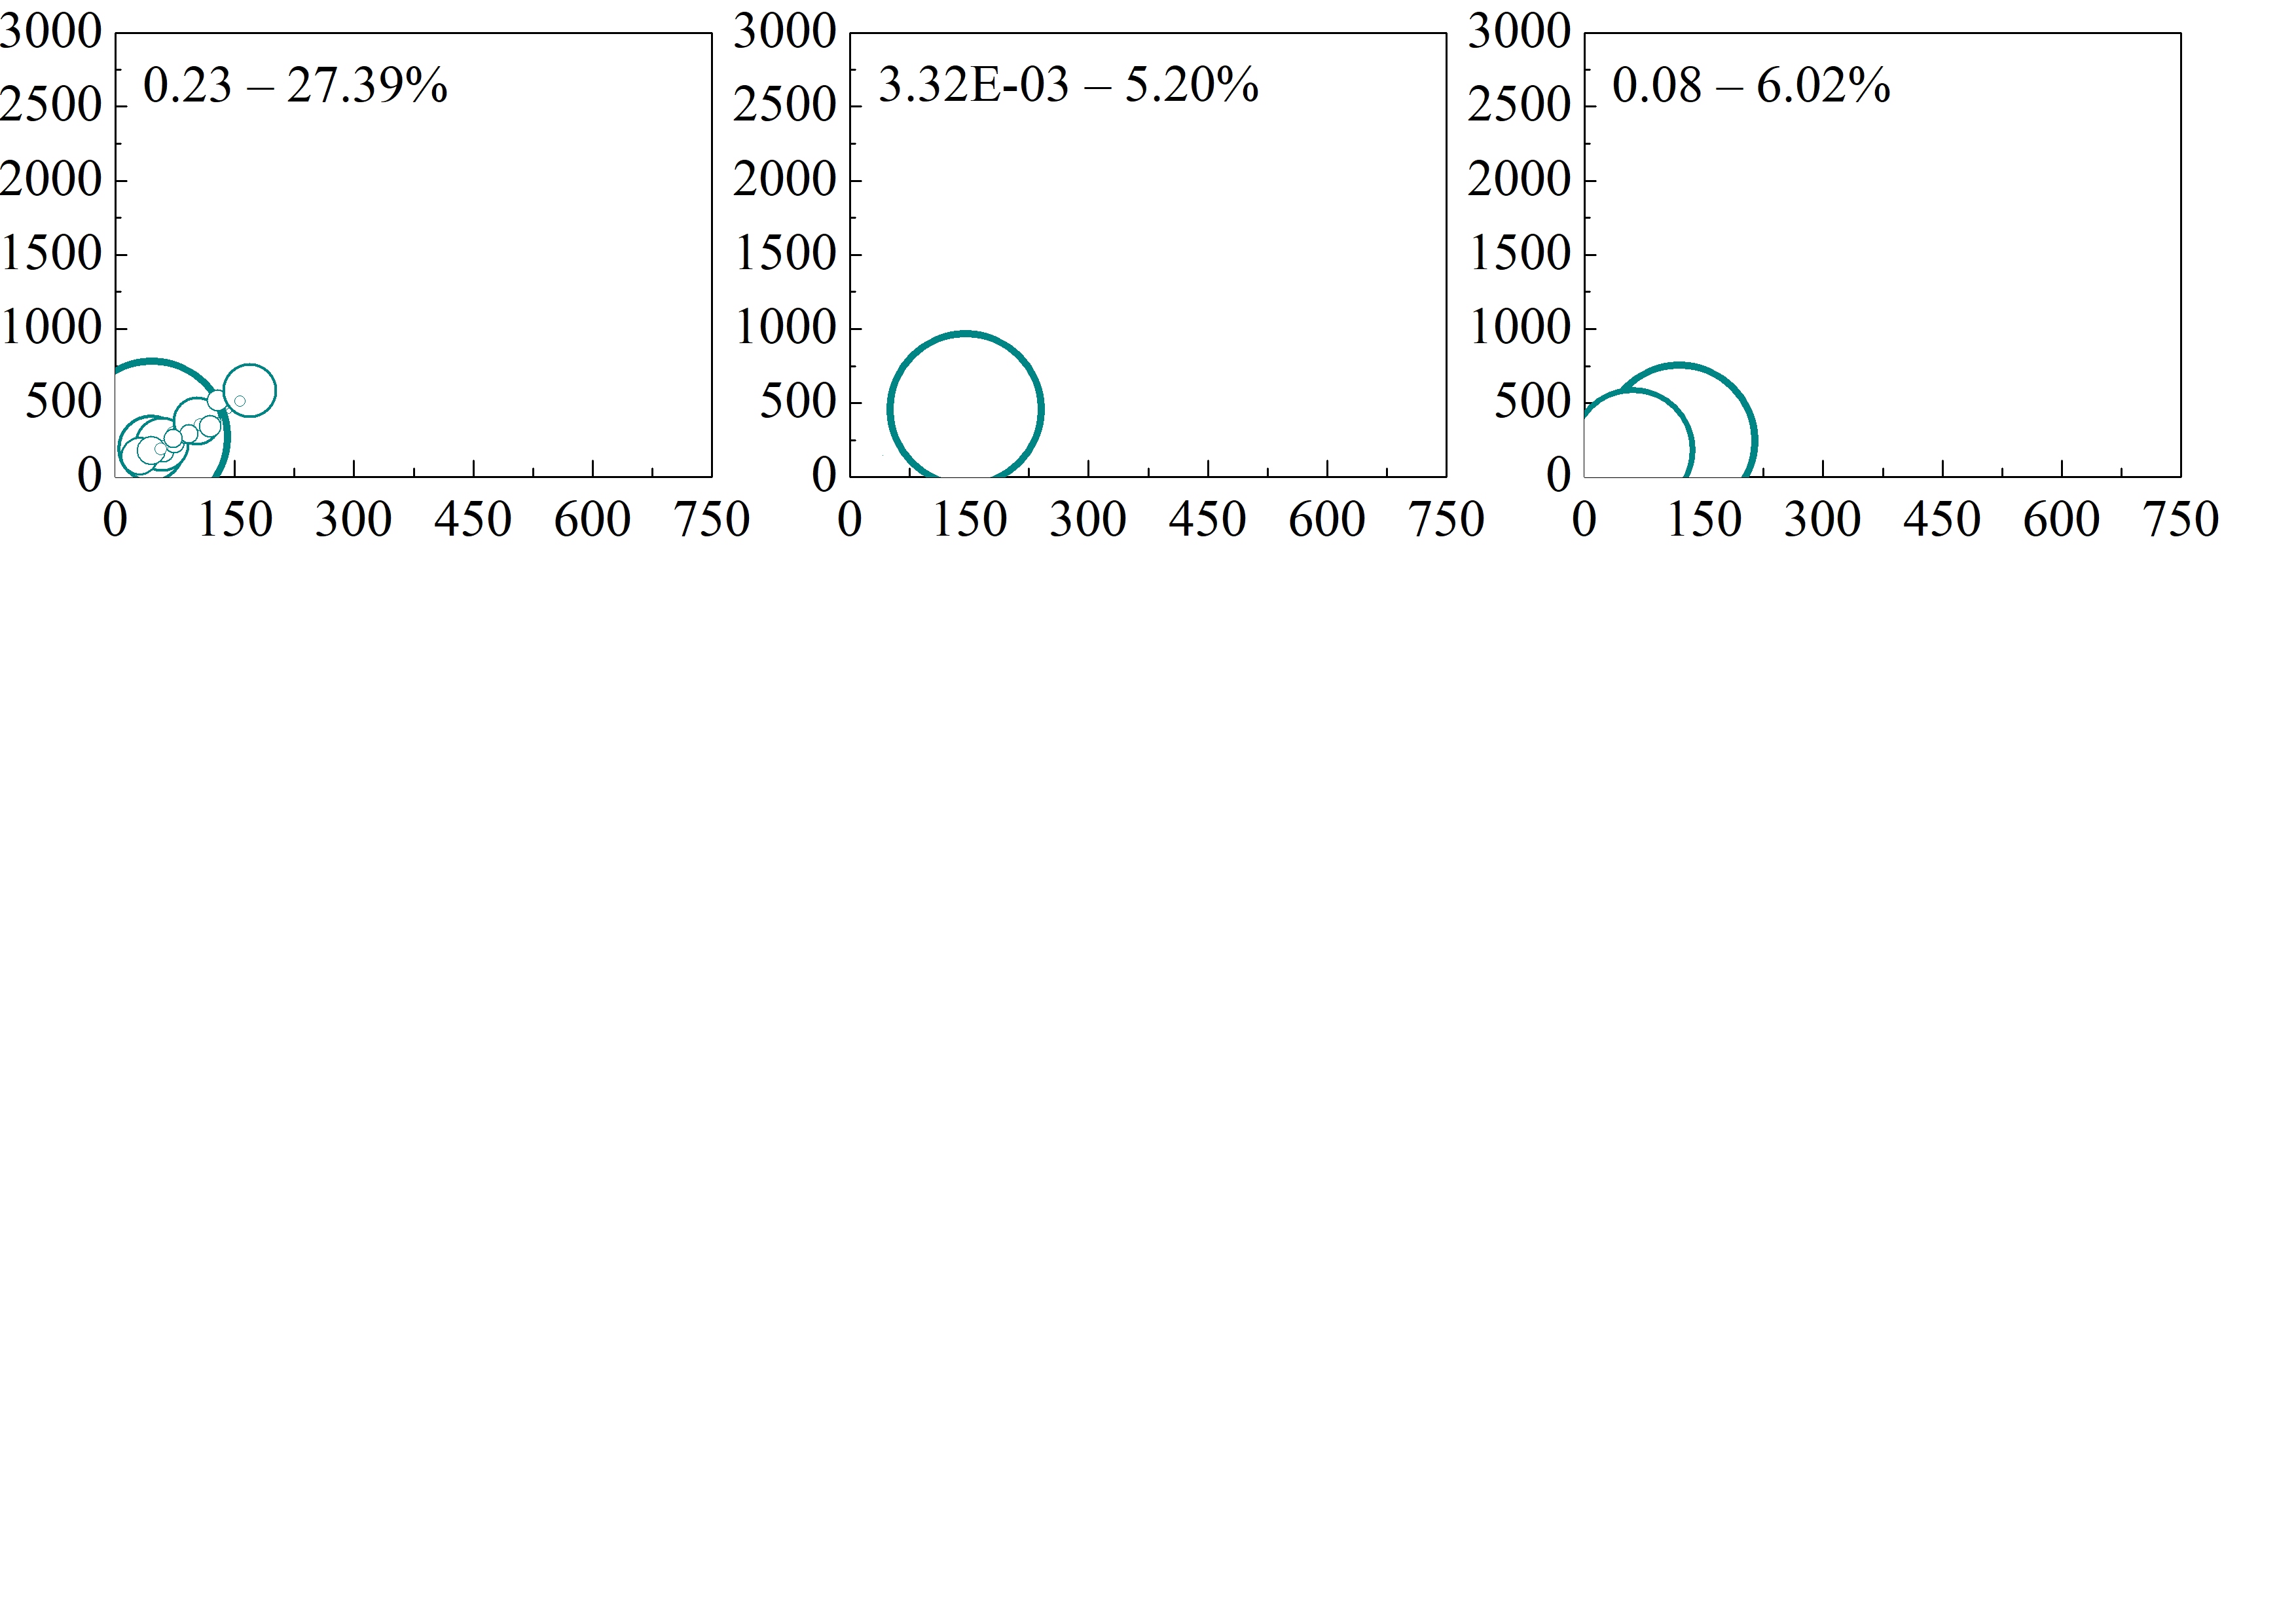* | | | |
| *d) Fluorine* | *e) Bromine* | *f) Iodine* |
| *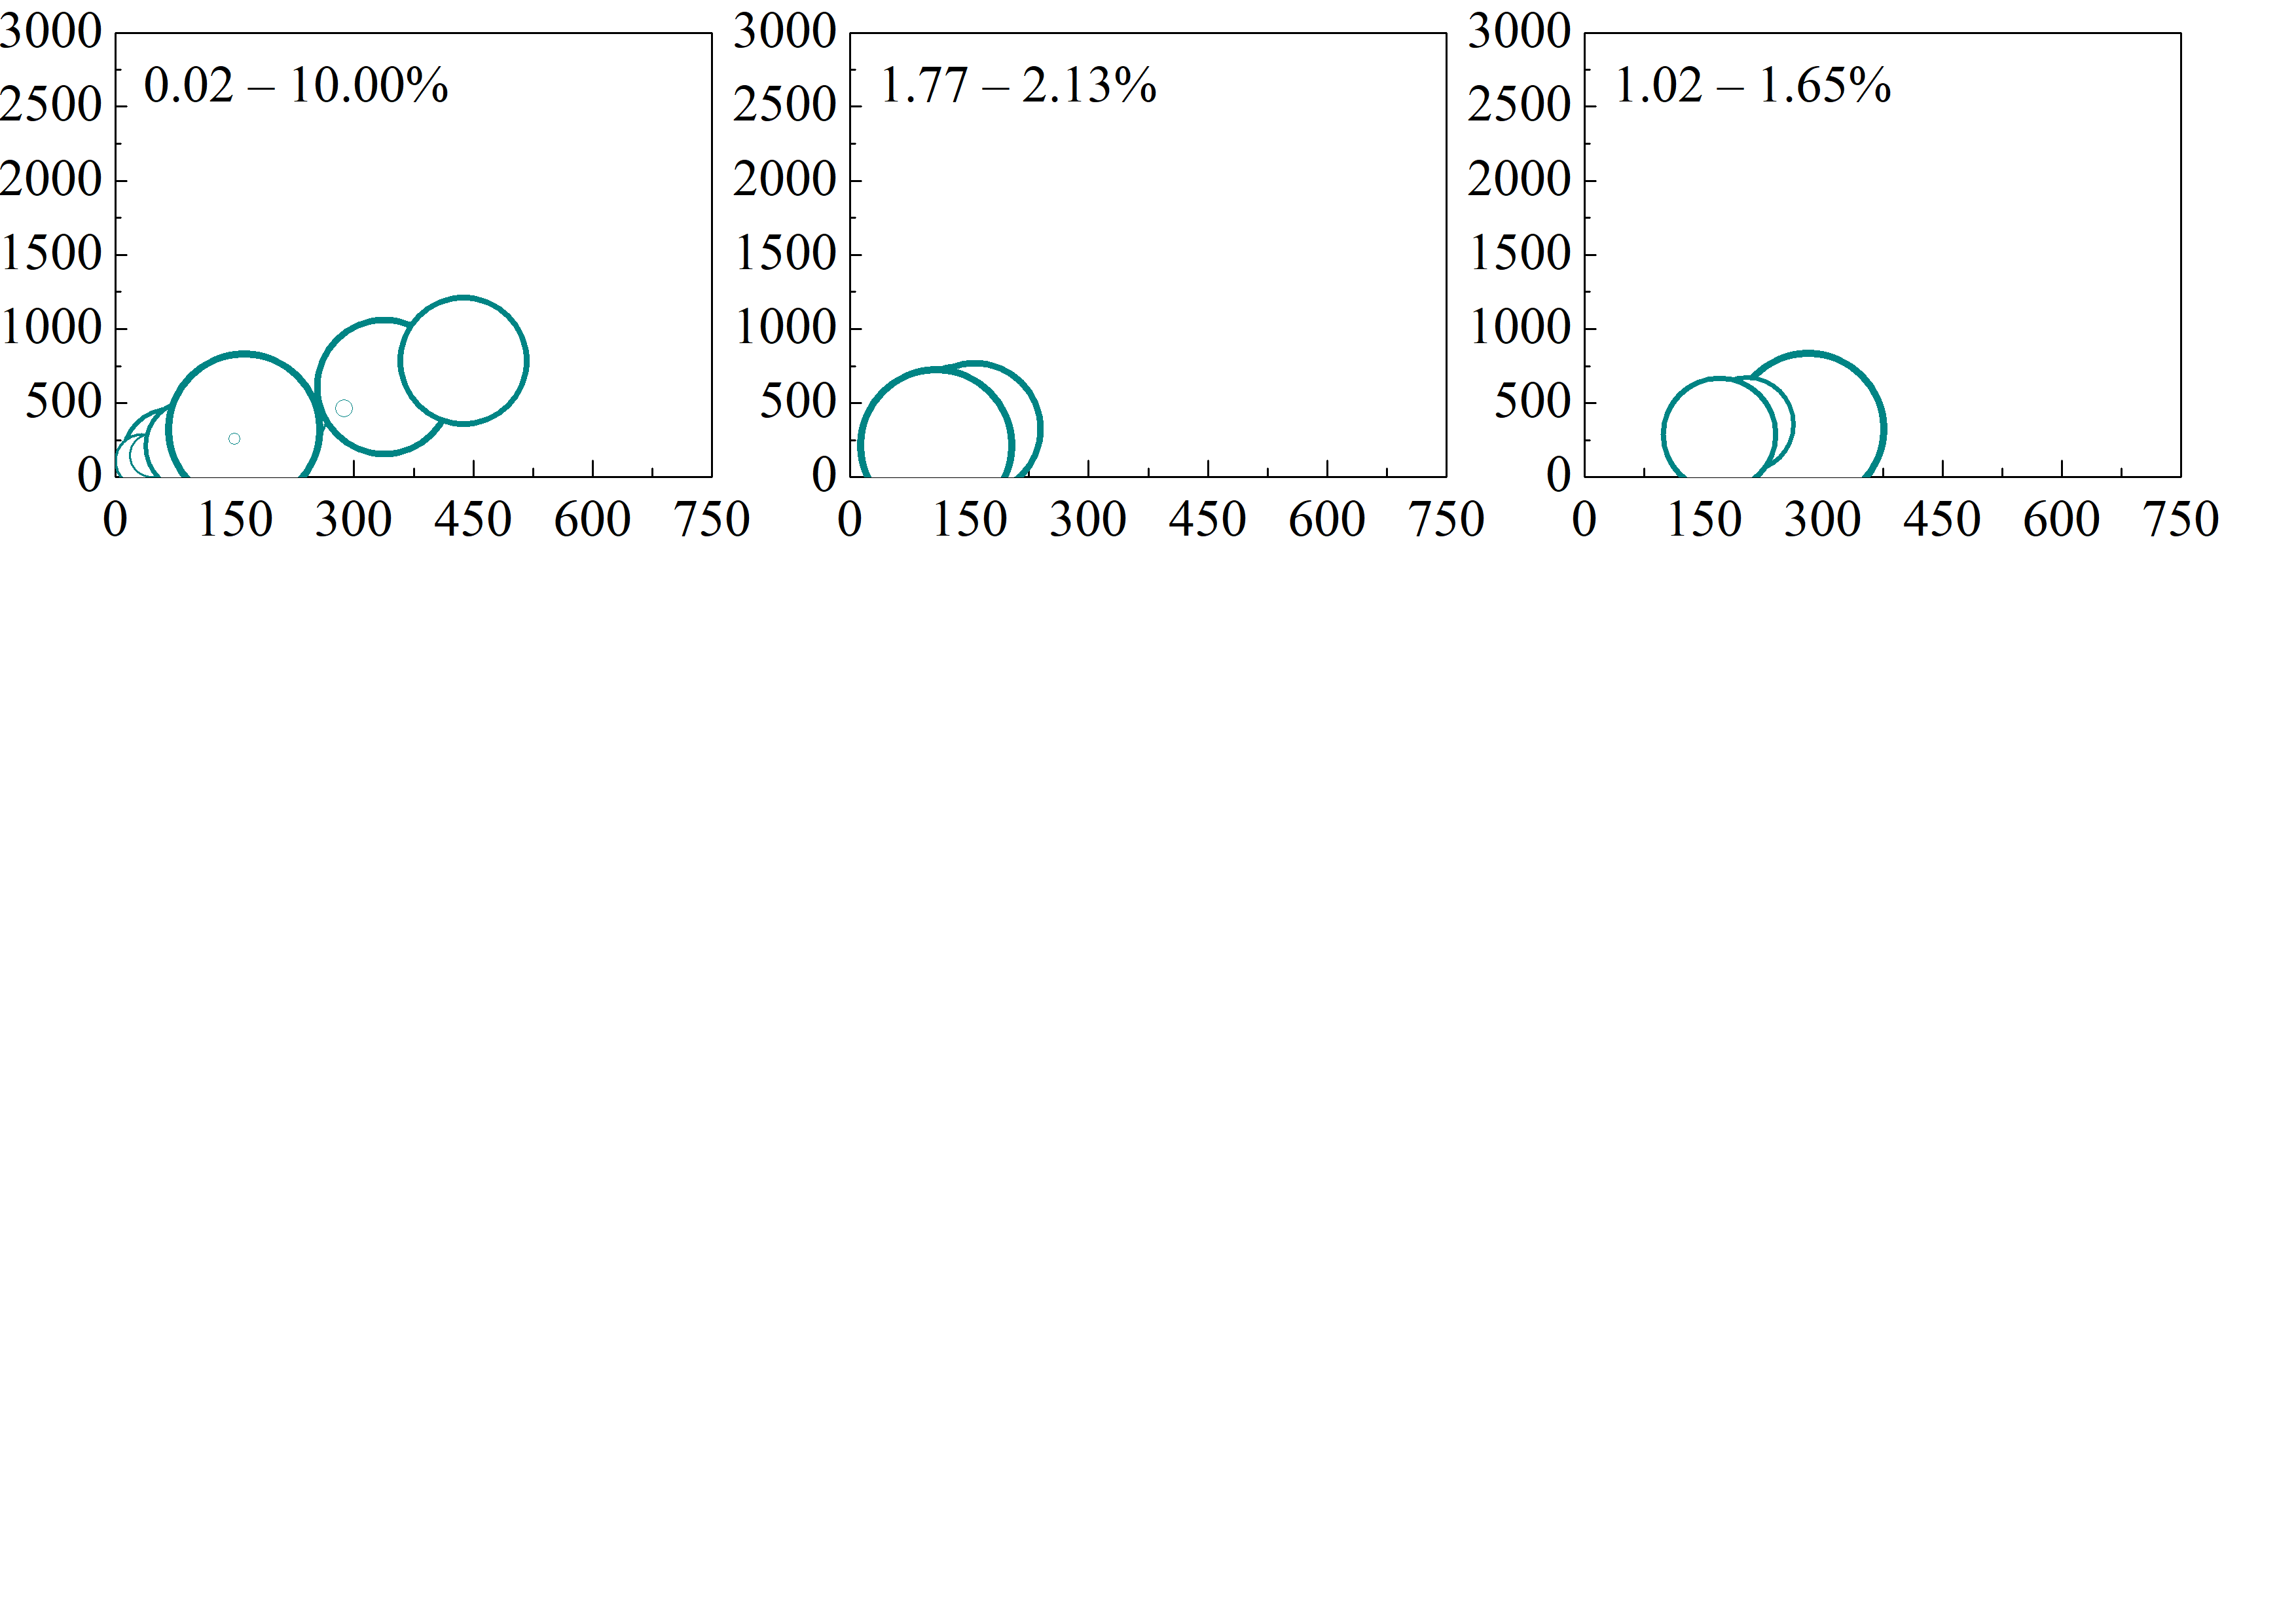* | | | |
| *g) Other halogenated* | *h) Sulfur* | *i) Silicon* |
| *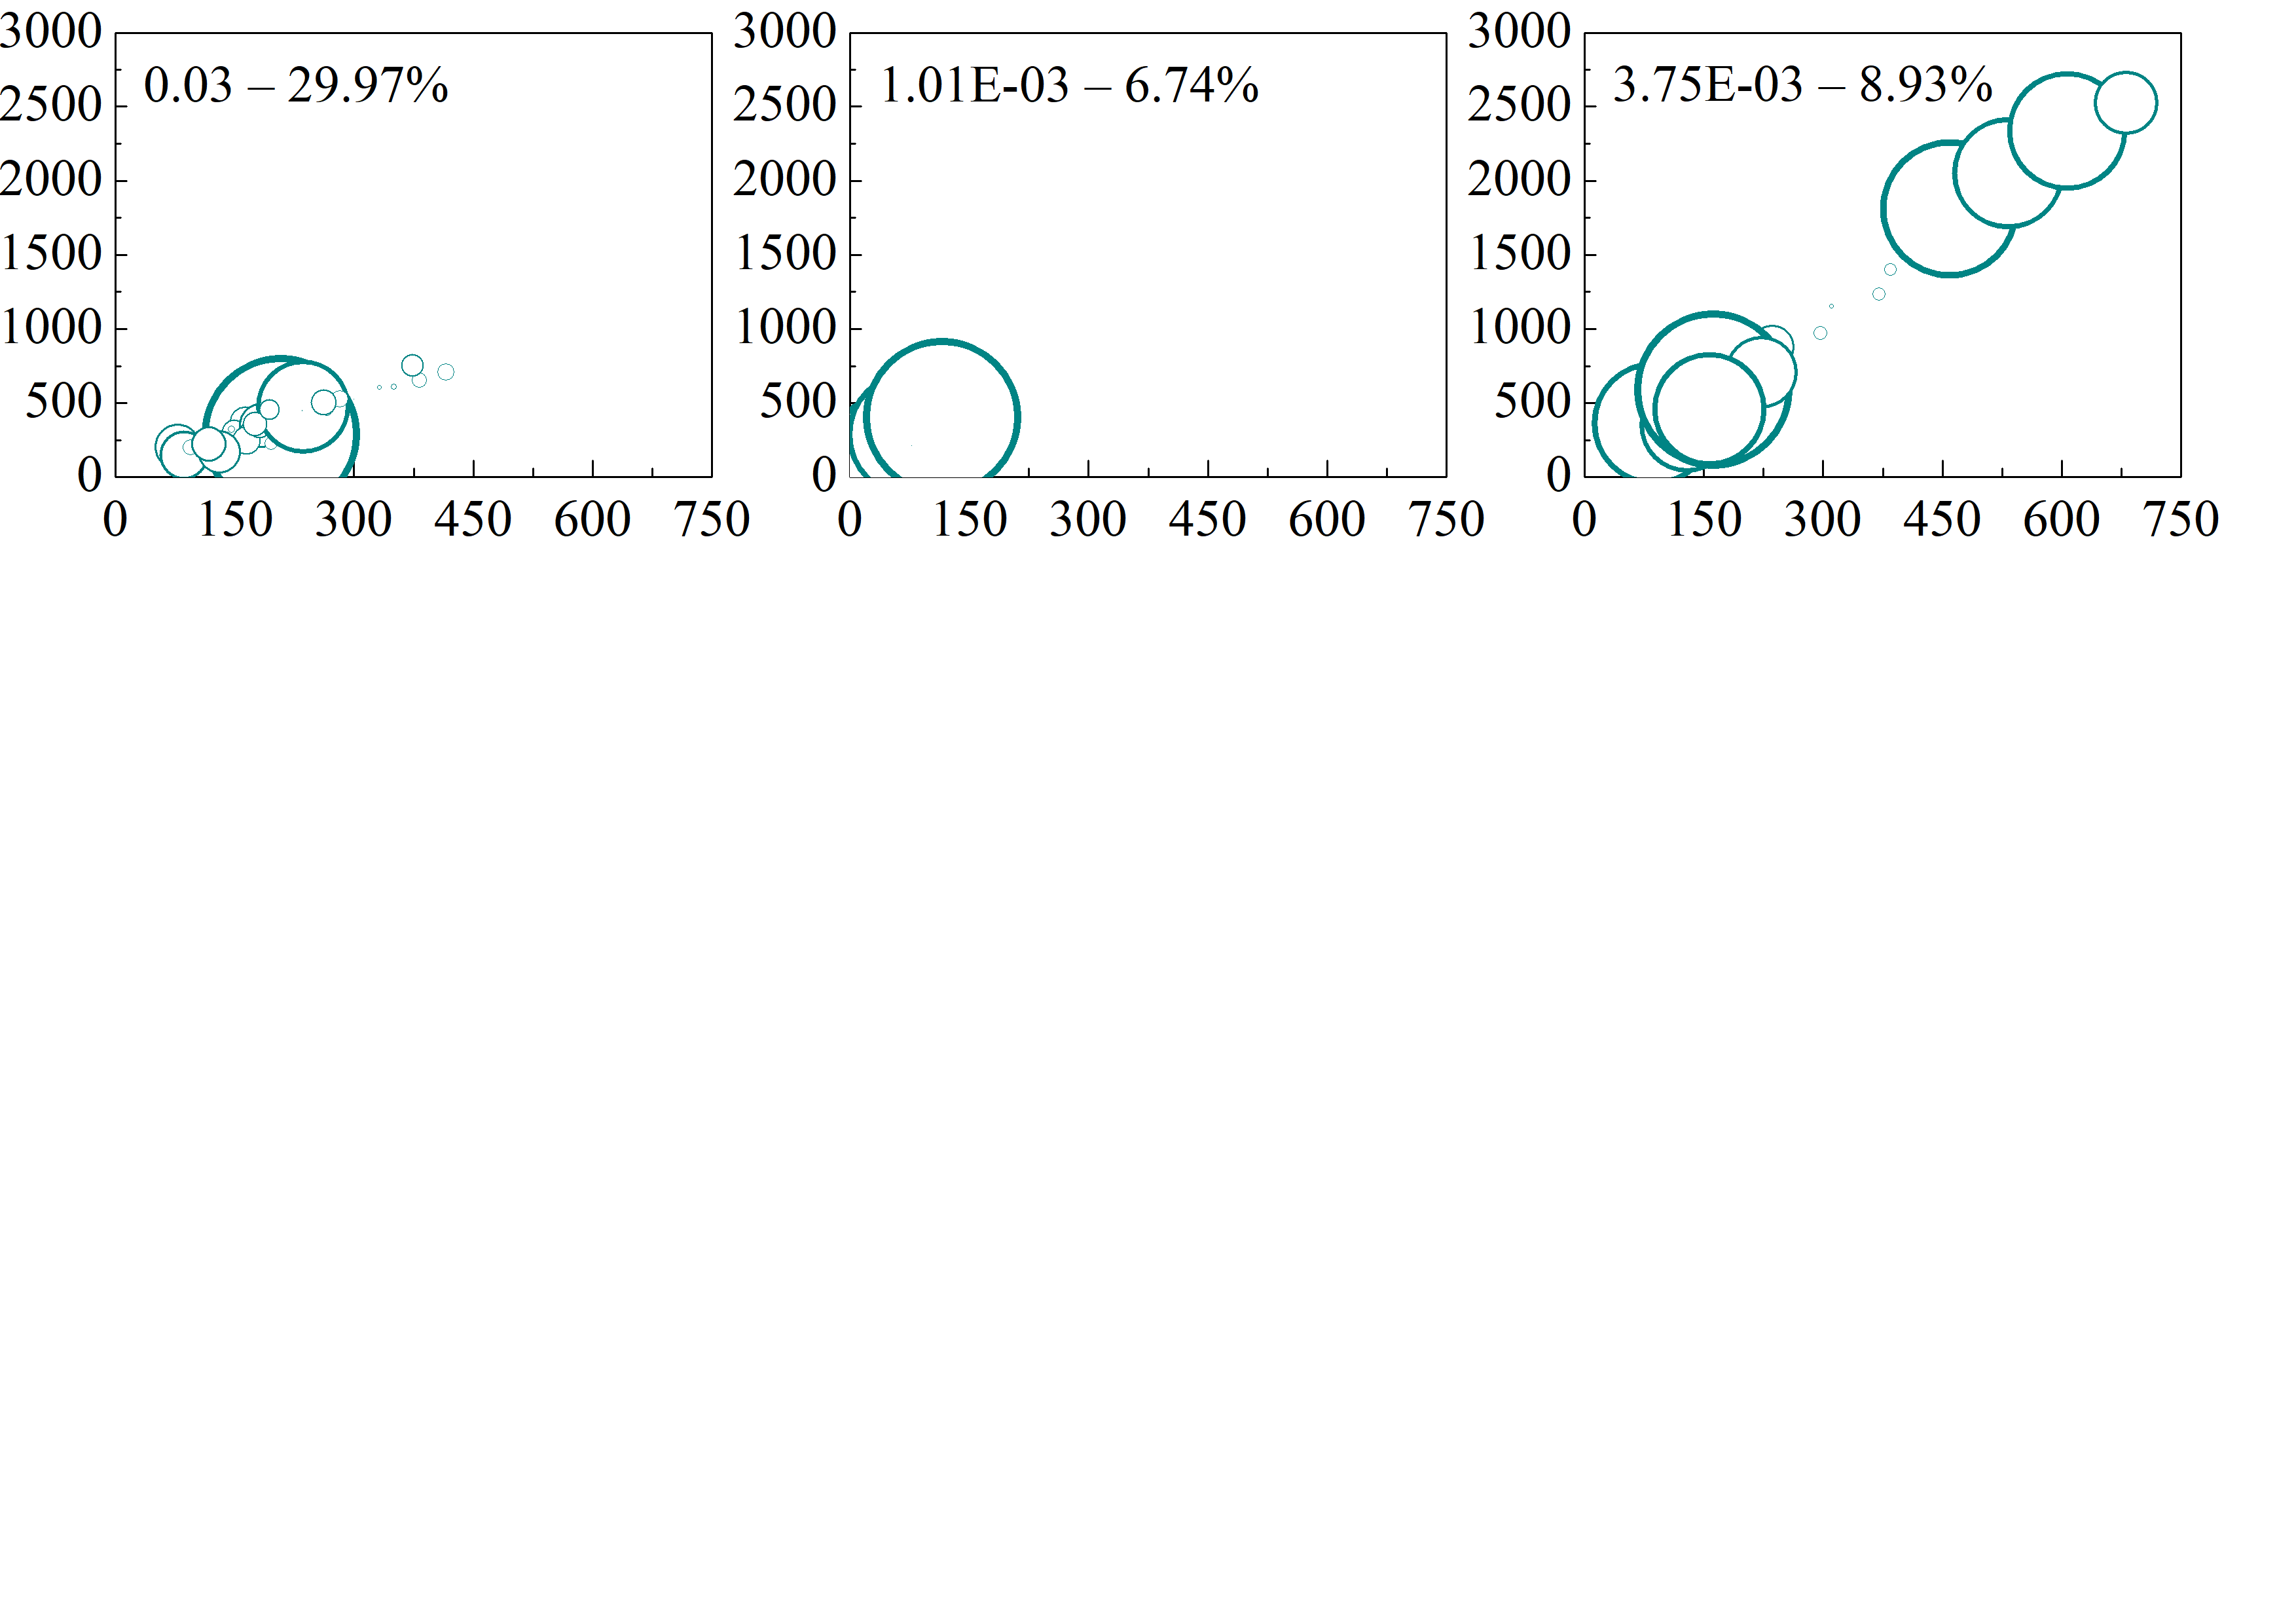* | | | |
|  | *Molecular weight, g/mol* | | | |

Compounds with the highest deviations: methyl hydrazine; ethyl 3-ethoxypropanoate; chloroform; hexafluoro-1,3-butadiene; bromoethane; 1,2-diiodoethane; 1,1,1,5,5,5-hexafluoro-2,4-pentanedione; cyclohexanethiol; hexamethyldisiloxane.
